# Supplementary material for: Evaluating the density of organic compounds at variable temperatures by a norm descriptor-based QSPR model
Source: Royal Society of Chemistry journal article supplement (doi:10.1039/d5me00035a), 2025-01-01
Supplement: d5me00035a1.xlsx [file d5me00035a1.xlsx]

## Sheet: ρ(NI, T)-QSPR model
cas	chemicals	T	ρ_exp(kg/m3)	ρ_cal(kg/m3)	train0/test1
100_00_5	Benzene, 1-chloro-4-nitro-	363.12	1293	1311.96	0
100_00_5	Benzene, 1-chloro-4-nitro-	383.13	1272	1292.6	0
100_00_5	Benzene, 1-chloro-4-nitro-	398.13	1256	1278.46	0
100_00_5	Benzene, 1-chloro-4-nitro-	413.03	1242	1264.68	0
100_00_5	Benzene, 1-chloro-4-nitro-	428.14	1225	1250.97	0
100_00_5	Benzene, 1-chloro-4-nitro-	448.34	1204	1232.98	0
100_00_5	Benzene, 1-chloro-4-nitro-	467.55	1184	1216.2	0
100_00_5	Benzene, 1-chloro-4-nitro-	482.36	1169	1203.46	0
100_02_7	Phenol, 4-nitro-	418.63	1249	1235.8	0
100_02_7	Phenol, 4-nitro-	435.14	1234	1220.93	0
100_02_7	Phenol, 4-nitro-	449.64	1222	1208.07	0
100_02_7	Phenol, 4-nitro-	469.65	1205	1190.6	0
100_02_7	Phenol, 4-nitro-	423.13	1246.2	1231.72	0
100_02_7	Phenol, 4-nitro-	463.15	1208.8	1196.25	0
100_02_7	Phenol, 4-nitro-	387.12	1285.4	1264.98	0
100_02_7	Phenol, 4-nitro-	390.12	1282.8	1262.16	0
100_02_7	Phenol, 4-nitro-	395.12	1278.1	1257.47	0
100_02_7	Phenol, 4-nitro-	400.12	1272.6	1252.81	0
100_02_7	Phenol, 4-nitro-	405.12	1270	1248.18	0
100_02_7	Phenol, 4-nitro-	408.12	1266.9	1245.41	0
100_02_7	Phenol, 4-nitro-	413.12	1262.6	1240.83	0
100_06_1	4-Acetylanisole	314.43	1081.6	1062.74	1
100_15_2	Benzenamine, N-methyl-4-nitro-	428.34	1201	1111.32	0
100_15_2	Benzenamine, N-methyl-4-nitro-	443.14	1189	1099.2	0
100_15_2	Benzenamine, N-methyl-4-nitro-	459.15	1176	1086.2	0
100_15_2	Benzenamine, N-methyl-4-nitro-	472.15	1165	1075.72	0
100_15_2	Benzenamine, N-methyl-4-nitro-	483.16	1156	1066.9	0
100_17_4	Benzene, 1-methoxy-4-nitro-	333.62	1216	1206.59	0
100_17_4	Benzene, 1-methoxy-4-nitro-	356.12	1194	1186.14	0
100_17_4	Benzene, 1-methoxy-4-nitro-	368.12	1183	1175.47	0
100_17_4	Benzene, 1-methoxy-4-nitro-	388.33	1165	1157.83	0
100_17_4	Benzene, 1-methoxy-4-nitro-	417.63	1137	1132.87	0
100_17_4	Benzene, 1-methoxy-4-nitro-	440.34	1115	1113.95	0
100_17_4	Benzene, 1-methoxy-4-nitro-	453.25	1101	1103.33	0
100_17_4	Benzene, 1-methoxy-4-nitro-	467.65	1086	1091.6	0
100_17_4	Benzene, 1-methoxy-4-nitro-	493.16	1059	1071.05	0
100_17_4	Benzene, 1-methoxy-4-nitro-	348.12	1201	1193.34	0
100_18_5	Benzene, 1,4-bis(1-methylethyl)-	293.14	857.6	877.561	0
100_18_5	Benzene, 1,4-bis(1-methylethyl)-	303.13	849.4	869.786	0
100_18_5	Benzene, 1,4-bis(1-methylethyl)-	298.15	852.5	873.666	0
100_29_8	Benzene, 1-ethoxy-4-nitro-	380.63	1111	1096.63	0
100_29_8	Benzene, 1-ethoxy-4-nitro-	397.63	1094	1081.76	0
100_29_8	Benzene, 1-ethoxy-4-nitro-	413.13	1079	1068.35	0
100_29_8	Benzene, 1-ethoxy-4-nitro-	430.14	1063	1053.77	0
100_29_8	Benzene, 1-ethoxy-4-nitro-	443.14	1051	1042.71	0
100_29_8	Benzene, 1-ethoxy-4-nitro-	458.75	1036	1029.52	0
100_29_8	Benzene, 1-ethoxy-4-nitro-	474.15	1020	1016.61	0
100_29_8	Benzene, 1-ethoxy-4-nitro-	493.16	1002	1000.77	0
100_37_8	N,N-Diethyl-2-aminoethanol	296	880.9	880.621	1
100_37_8	N,N-Diethyl-2-aminoethanol	353.7	829	835.044	1
100_37_8	N,N-Diethyl-2-aminoethanol	372.3	809.8	820.275	1
100_37_8	N,N-Diethyl-2-aminoethanol	392	790.4	804.602	1
100_37_8	N,N-Diethyl-2-aminoethanol	413.4	768.7	787.545	1
100_37_8	N,N-Diethyl-2-aminoethanol	298.15	879.54	878.931	1
100_37_8	N,N-Diethyl-2-aminoethanol	303.15	874.82	874.998	1
100_37_8	N,N-Diethyl-2-aminoethanol	313.15	865.56	867.119	1
100_37_8	N,N-Diethyl-2-aminoethanol	283.15	894.041	890.707	1
100_37_8	N,N-Diethyl-2-aminoethanol	288.15	888.773	886.786	1
100_37_8	N,N-Diethyl-2-aminoethanol	278.1	897.37	894.662	1
100_37_8	N,N-Diethyl-2-aminoethanol	333.15	846.49	851.323	1
100_37_8	N,N-Diethyl-2-aminoethanol	348.13	830.7	839.461	1
100_37_8	N,N-Diethyl-2-aminoethanol	373.12	806.3	819.623	1
100_37_8	N,N-Diethyl-2-aminoethanol	398.12	782.6	799.727	1
100_37_8	N,N-Diethyl-2-aminoethanol	423.12	758.3	779.788	1
100_37_8	N,N-Diethyl-2-aminoethanol	308.15	873.78	871.06	1
100_37_8	N,N-Diethyl-2-aminoethanol	318.15	865.08	863.175	1
100_37_8	N,N-Diethyl-2-aminoethanol	323.15	855.5	859.227	1
100_37_8	N,N-Diethyl-2-aminoethanol	343.15	838.157	843.407	1
100_37_8	N,N-Diethyl-2-aminoethanol	363.15	818.597	827.544	1
100_41_4	Ethylbenzene	273.15	883.14	894.444	0
100_41_4	Ethylbenzene	281.64	877.02	886.518	0
100_41_4	Ethylbenzene	227.99	924.13	936.885	0
100_41_4	Ethylbenzene	370.72	796.3	803.957	0
100_41_4	Ethylbenzene	334.12	832.1	837.768	0
100_41_4	Ethylbenzene	300.03	861.201	869.39	0
100_41_4	Ethylbenzene	319.99	843.19	850.858	0
100_41_4	Ethylbenzene	339.98	825.22	832.346	0
100_41_4	Ethylbenzene	359.98	806.88	813.866	0
100_41_4	Ethylbenzene	379.97	788.12	795.43	0
100_41_4	Ethylbenzene	399.97	768.77	777.014	0
100_41_4	Ethylbenzene	348.15	817.75	824.793	0
100_41_4	Ethylbenzene	295.05	865.25	874.023	0
100_41_4	Ethylbenzene	304.75	856.73	865.003	0
100_41_4	Ethylbenzene	323.15	840.39	847.928	0
100_41_4	Ethylbenzene	328.15	835.39	843.296	0
100_41_4	Ethylbenzene	343.15	822.19	829.415	0
100_41_4	Ethylbenzene	353.15	812.73	820.173	0
100_41_4	Ethylbenzene	363.15	803.75	810.941	0
100_41_4	Ethylbenzene	373.15	794.21	801.717	0
100_41_4	Ethylbenzene	310.65	851.407	859.523	0
100_41_4	Ethylbenzene	315.65	846.964	854.883	0
100_42_5	Styrene	416.13	792.6	799.031	0
100_42_5	Styrene	273.15	925.1	921.916	0
100_42_5	Styrene	285.54	908.6	911.283	0
100_42_5	Styrene	348.12	849.4	857.522	0
100_42_5	Styrene	255.36	941	937.176	0
100_42_5	Styrene	268.75	929.7	925.691	0
100_42_5	Styrene	313.15	886.88	887.573	0
100_42_5	Styrene	323.15	877.32	878.982	0
100_42_5	Styrene	333.15	867.76	870.389	0
100_42_5	Styrene	343.15	858.2	861.794	0
100_42_5	Styrene	353.15	848.64	853.198	0
100_42_5	Styrene	363.15	843.99	844.6	0
100_43_6	Pyridine, 4-ethenyl-	293.14	983.6	979.629	0
100_43_6	Pyridine, 4-ethenyl-	313.13	966.7	962.574	0
100_44_7	Benzyl chloride	448.14	945.2	956.82	0
100_44_7	Benzyl chloride	278.15	1112.47	1113.06	0
100_44_7	Benzyl chloride	283.14	1107.71	1108.14	0
100_44_7	Benzyl chloride	273.15	1118.73	1118.02	0
100_44_7	Benzyl chloride	313.83	1080.6	1078.53	0
100_44_7	Benzyl chloride	298.15	1094.82	1093.53	0
100_44_7	Benzyl chloride	308.15	1089.4	1083.94	0
100_46_9	Benzylamine	277.15	995.704	1014.27	0
100_46_9	Benzylamine	278.15	994.774	1013.39	0
100_46_9	Benzylamine	283.14	990.154	1009.04	0
100_46_9	Benzylamine	288.14	985.561	1004.68	0
100_46_9	Benzylamine	294.34	980.8	999.286	0
100_46_9	Benzylamine	353.82	929.7	947.883	0
100_46_9	Benzylamine	374.12	911.6	930.455	0
100_46_9	Benzylamine	414.03	875.8	896.313	0
100_46_9	Benzylamine	429.34	862	883.251	0
100_46_9	Benzylamine	451.34	841.8	864.509	0
100_46_9	Benzylamine	315.13	965.3	981.251	0
100_46_9	Benzylamine	334.12	948.9	964.845	0
100_46_9	Benzylamine	359.72	927.2	942.813	0
100_46_9	Benzylamine	303.15	973.7	991.633	0
100_46_9	Benzylamine	323.15	957	974.315	0
100_46_9	Benzylamine	298.15	978.337	995.974	0
100_46_9	Benzylamine	308.15	970	987.297	0
100_46_9	Benzylamine	318.15	961.3	978.638	0
100_46_9	Benzylamine	328.15	952.5	969.997	0
100_46_9	Benzylamine	338.15	943.7	961.371	0
100_46_9	Benzylamine	343.15	939.4	957.064	0
100_46_9	Benzylamine	348.15	935	952.76	0
100_46_9	Benzylamine	363.15	921.8	939.867	0
100_46_9	Benzylamine	368.15	917.3	935.576	0
100_46_9	Benzylamine	378.15	908.5	927.001	0
100_46_9	Benzylamine	383.15	904	922.717	0
100_46_9	Benzylamine	388.15	899.7	918.436	0
100_46_9	Benzylamine	393.15	895.2	914.157	0
100_46_9	Benzylamine	398.15	890.6	909.881	0
100_46_9	Benzylamine	403.15	886.2	905.606	0
100_46_9	Benzylamine	408.15	881.6	901.334	0
100_46_9	Benzylamine	418.15	872.5	892.796	0
100_46_9	Benzylamine	423.15	867.9	888.53	0
100_46_9	Benzylamine	433.15	858.7	880.003	0
100_46_9	Benzylamine	438.15	854	875.742	0
100_46_9	Benzylamine	443.15	849.3	871.483	0
100_47_0	Benzonitrile	291.14	1005.2	1026.18	0
100_47_0	Benzonitrile	298.64	1000.3	1019.37	0
100_47_0	Benzonitrile	278.15	1018.07	1038.07	0
100_47_0	Benzonitrile	348.12	960	975.294	0
100_47_0	Benzonitrile	373.82	934.6	952.857	0
100_47_0	Benzonitrile	393.13	917.5	936.153	0
100_47_0	Benzonitrile	433.54	879.6	901.543	0
100_47_0	Benzonitrile	453.85	859	884.294	0
100_47_0	Benzonitrile	313.43	988.5	1006.05	0
100_47_0	Benzonitrile	333.62	971.3	988.076	0
100_47_0	Benzonitrile	359.72	948.6	965.135	0
100_47_0	Benzonitrile	353.12	951.8	970.908	0
100_47_0	Benzonitrile	413.13	897.5	918.971	0
100_47_0	Benzonitrile	397.97	911.8	931.985	0
100_47_0	Benzonitrile	422.96	885.1	910.565	0
100_47_0	Benzonitrile	447.96	859.8	889.287	0
100_47_0	Benzonitrile	303.2	996.088	1015.25	0
100_47_0	Benzonitrile	323.15	978.341	997.369	0
100_47_0	Benzonitrile	308.15	991.06	1010.79	0
100_47_0	Benzonitrile	318.15	982.13	1001.83	0
100_47_0	Benzonitrile	285.15	1012.21	1031.64	0
100_48_1	4-Pyridinecarbonitrile	363.13	1029.2	1073.1	0
100_48_1	4-Pyridinecarbonitrile	373.07	1019.8	1064.08	0
100_48_1	4-Pyridinecarbonitrile	383.12	1010.3	1055.04	0
100_48_1	4-Pyridinecarbonitrile	398.12	995.5	1041.67	0
100_49_2	Cyclohexanemethanol	353.12	886.2	873.514	0
100_49_2	Cyclohexanemethanol	293.15	929.76	925.685	0
100_49_2	Cyclohexanemethanol	298.15	926.25	921.3	0
100_49_2	Cyclohexanemethanol	303.15	922.71	916.922	0
100_49_2	Cyclohexanemethanol	308.15	919.14	912.551	0
100_49_2	Cyclohexanemethanol	313.15	915.53	908.188	0
100_49_2	Cyclohexanemethanol	318.15	911.88	903.831	0
100_49_2	Cyclohexanemethanol	323.15	908.19	899.479	0
100_49_2	Cyclohexanemethanol	328.15	904.45	895.134	0
100_49_2	Cyclohexanemethanol	333.15	900.67	890.795	0
100_50_5	3-Cyclohexene-1-carboxaldehyde	293.14	970.9	959.598	1
100_51_6	Benzyl alcohol	295.14	1041.2	1057.41	0
100_51_6	Benzyl alcohol	278.15	1057.17	1074.06	0
100_51_6	Benzyl alcohol	283.14	1053.03	1069.14	0
100_51_6	Benzyl alcohol	338.12	1009.15	1016.49	0
100_51_6	Benzyl alcohol	348.12	1000.59	1007.18	0
100_51_6	Benzyl alcohol	353.12	996.484	1002.54	0
100_51_6	Benzyl alcohol	363.12	988.194	993.313	0
100_51_6	Benzyl alcohol	368.12	984.133	988.721	0
100_51_6	Benzyl alcohol	373.12	980.207	984.142	0
100_51_6	Benzyl alcohol	306.03	1037.9	1046.89	0
100_51_6	Benzyl alcohol	324.63	1022.6	1029.17	0
100_51_6	Benzyl alcohol	330.92	1018.4	1023.24	0
100_51_6	Benzyl alcohol	344.52	1007.8	1010.52	0
100_51_6	Benzyl alcohol	290.14	1049	1062.28	0
100_51_6	Benzyl alcohol	273.15	1060.93	1079.03	0
100_51_6	Benzyl alcohol	258.06	1070.6	1094.22	0
100_51_6	Benzyl alcohol	314.23	1030.1	1039.04	0
100_51_6	Benzyl alcohol	334.12	1015.2	1020.24	0
100_51_6	Benzyl alcohol	359.72	995.2	996.444	0
100_51_6	Benzyl alcohol	393.13	964.6	965.939	0
100_51_6	Benzyl alcohol	413.13	946.4	947.918	0
100_51_6	Benzyl alcohol	433.14	928.8	930.039	0
100_51_6	Benzyl alcohol	453.14	910.8	912.298	0
100_51_6	Benzyl alcohol	473.15	891.4	894.662	0
100_51_6	Benzyl alcohol	298.15	1041.6	1054.49	0
100_51_6	Benzyl alcohol	318.15	1025.8	1035.31	0
100_51_6	Benzyl alcohol	308.5	1033.64	1044.52	0
100_53_8	Benzenemethanethiol	298.14	1051.43	1043.92	0
100_54_9	3-Pyridinecarbonitrile	333.13	1065	1095.08	0
100_54_9	3-Pyridinecarbonitrile	348.13	1051.1	1081.09	0
100_54_9	3-Pyridinecarbonitrile	373.07	1027.6	1058.27	0
100_54_9	3-Pyridinecarbonitrile	398.12	1004.3	1035.8	0
100_55_0	Nicotinyl alcohol	333.12	1109.3	1108.88	0
100_55_0	Nicotinyl alcohol	358.12	1071.4	1085.16	0
100_55_0	Nicotinyl alcohol	291.15	1138.2	1150.23	0
100_55_0	Nicotinyl alcohol	295.15	1135.3	1146.19	0
100_55_0	Nicotinyl alcohol	300.15	1131.8	1141.17	0
100_55_0	Nicotinyl alcohol	304.15	1128.9	1137.18	0
100_55_0	Nicotinyl alcohol	310.15	1124.7	1131.24	0
100_55_0	Nicotinyl alcohol	315.15	1121.2	1126.32	0
100_55_0	Nicotinyl alcohol	318.15	1119.3	1123.39	0
100_60_7	Cyclohexanamine, N-methyl-	298.15	865.2	855.525	0
100_60_7	Cyclohexanamine, N-methyl-	308.15	856.57	847.427	0
100_60_7	Cyclohexanamine, N-methyl-	318.15	847.67	839.316	0
100_60_7	Cyclohexanamine, N-methyl-	328.15	838.68	831.195	0
100_61_8	Aniline, N-methyl-	280.95	998.3	987.66	0
100_61_8	Aniline, N-methyl-	283.14	994.253	985.695	0
100_61_8	Aniline, N-methyl-	291.14	987.9	978.533	0
100_61_8	Aniline, N-methyl-	304.13	977.5	966.95	0
100_61_8	Aniline, N-methyl-	314.93	968.7	957.358	0
100_61_8	Aniline, N-methyl-	325.43	960.2	948.062	0
100_61_8	Aniline, N-methyl-	328.13	957.1	945.676	0
100_61_8	Aniline, N-methyl-	343.12	946.79	932.46	0
100_61_8	Aniline, N-methyl-	338.12	952	936.863	0
100_61_8	Aniline, N-methyl-	354.02	936	922.88	0
100_61_8	Aniline, N-methyl-	377.62	915	902.211	0
100_61_8	Aniline, N-methyl-	395.13	899	886.933	0
100_61_8	Aniline, N-methyl-	425.13	872	860.851	0
100_61_8	Aniline, N-methyl-	451.94	850	837.626	0
100_61_8	Aniline, N-methyl-	273.15	1002.14	994.672	0
100_61_8	Aniline, N-methyl-	368.62	926.1	910.082	0
100_61_8	Aniline, N-methyl-	453.65	853.5	836.147	0
100_61_8	Aniline, N-methyl-	333.42	955.5	941.006	0
100_61_8	Aniline, N-methyl-	358.62	935	918.843	0
100_61_8	Aniline, N-methyl-	253.17	1019	1012.75	0
100_61_8	Aniline, N-methyl-	373.12	921.3	906.145	0
100_61_8	Aniline, N-methyl-	413.13	887.1	871.27	0
100_61_8	Aniline, N-methyl-	433.14	869.4	853.904	0
100_61_8	Aniline, N-methyl-	294.15	986.5	975.844	0
100_61_8	Aniline, N-methyl-	308.15	973.9	963.375	0
100_61_8	Aniline, N-methyl-	318.15	966.3	954.504	0
100_61_8	Aniline, N-methyl-	300.15	979.8	970.493	0
100_63_0	Hydrazine, phenyl-	293.44	1097.8	1105.15	1
100_63_0	Hydrazine, phenyl-	298.14	1093.77	1101.32	1
100_63_0	Hydrazine, phenyl-	303.13	1089.9	1097.26	1
100_63_0	Hydrazine, phenyl-	318.13	1077.07	1085.09	1
100_63_0	Hydrazine, phenyl-	333.12	1065.3	1072.97	1
100_66_3	Anisole	278.15	1006.97	1004.32	1
100_66_3	Anisole	252.07	1029	1029.93	1
100_66_3	Anisole	273.55	1010	1008.79	1
100_66_3	Anisole	363.92	927	923.914	1
100_66_3	Anisole	383.13	907	906.43	1
100_66_3	Anisole	407.83	882	884.141	1
100_66_3	Anisole	424.13	865	869.534	1
100_66_3	Anisole	291.14	995.6	991.821	1
100_66_3	Anisole	329.03	960.9	956.085	1
100_66_3	Anisole	353.62	938.1	933.351	1
100_66_3	Anisole	374.12	918.2	914.613	1
100_66_3	Anisole	387.63	903.9	902.354	1
100_66_3	Anisole	401.13	890.1	890.167	1
100_66_3	Anisole	415.23	874.5	877.5	1
100_66_3	Anisole	333.52	958.5	951.911	1
100_66_3	Anisole	359.82	933.9	927.665	1
100_66_3	Anisole	394.03	901	896.569	1
100_66_3	Anisole	298.15	990.1	985.133	1
100_66_3	Anisole	303.15	984.6	980.386	1
100_66_3	Anisole	308.15	981.4	975.657	1
100_66_3	Anisole	313.15	975.7	970.945	1
100_66_3	Anisole	323.15	963.5	961.57	1
100_66_3	Anisole	318.15	968.9	966.249	1
100_66_3	Anisole	338.15	956.4	947.617	1
100_66_3	Anisole	348.15	941.3	938.382	1
100_66_3	Anisole	283.15	1003.97	999.493	1
100_68_5	Benzene, (methylthio)-	293.14	1059.4	1039.27	0
100_68_5	Benzene, (methylthio)-	315.43	1039.7	1016.65	0
100_68_5	Benzene, (methylthio)-	334.42	1021.5	997.768	0
100_68_5	Benzene, (methylthio)-	359.02	999.6	973.737	0
100_68_5	Benzene, (methylthio)-	298.14	1053.92	1034.15	0
100_69_6	Pyridine, 2-ethenyl-	293.14	974.2	975.407	0
100_69_6	Pyridine, 2-ethenyl-	290.09	976.4	978.084	0
100_70_9	2-Pyridinecarbonitrile	303.14	1078.5	1114.97	0
100_70_9	2-Pyridinecarbonitrile	313.14	1069.4	1105.33	0
100_70_9	2-Pyridinecarbonitrile	323.14	1060.1	1095.79	0
100_70_9	2-Pyridinecarbonitrile	348.13	1037.7	1072.42	0
100_70_9	2-Pyridinecarbonitrile	373.07	1014.5	1049.62	0
100_70_9	2-Pyridinecarbonitrile	398.12	991.2	1027.15	0
100_71_0	Pyridine, 2-ethyl-	285.74	944.1	943.153	1
100_71_0	Pyridine, 2-ethyl-	313.13	912.6	917.621	1
100_71_0	Pyridine, 2-ethyl-	333.12	894.5	899.112	1
100_71_0	Pyridine, 2-ethyl-	358.12	873.2	876.082	1
100_71_0	Pyridine, 2-ethyl-	298.14	926.5	931.567	1
100_74_3	N-Ethylmorpholine	288.14	916.589	961.065	0
100_74_3	N-Ethylmorpholine	298.14	910.319	952.972	0
100_79_8	1,3-Dioxolane-4-methanol, 2,2-dimethyl-	293.15	1067.8	1077.01	0
100_79_8	1,3-Dioxolane-4-methanol, 2,2-dimethyl-	303.15	1058.9	1067.14	0
100_79_8	1,3-Dioxolane-4-methanol, 2,2-dimethyl-	313.15	1049.9	1057.37	0
100_79_8	1,3-Dioxolane-4-methanol, 2,2-dimethyl-	323.15	1040.8	1047.67	0
100_80_1	Benzene, 1-ethenyl-3-methyl-	289.14	906	908.616	0
100_80_1	Benzene, 1-ethenyl-3-methyl-	293.14	898.9	905.142	0
100_80_1	Benzene, 1-ethenyl-3-methyl-	273.15	928.3	922.509	0
100_80_1	Benzene, 1-ethenyl-3-methyl-	308.13	899.2	892.131	0
100_83_4	Benzaldehyde, 3-hydroxy-	423.13	1101.1	1073.41	0
100_83_4	Benzaldehyde, 3-hydroxy-	448.14	1078	1051.22	0
100_83_4	Benzaldehyde, 3-hydroxy-	463.15	1068.3	1038.08	0
100_84_5	Benzene, 1-methoxy-3-methyl-	277.15	985.204	981.637	0
100_84_5	Benzene, 1-methoxy-3-methyl-	278.15	984.375	980.714	0
100_84_5	Benzene, 1-methoxy-3-methyl-	283.14	980.057	976.119	0
100_84_5	Benzene, 1-methoxy-3-methyl-	288.14	975.67	971.53	0
100_84_5	Benzene, 1-methoxy-3-methyl-	293.14	971.328	966.954	0
100_84_5	Benzene, 1-methoxy-3-methyl-	318.08	954.6	944.316	0
100_84_5	Benzene, 1-methoxy-3-methyl-	298.15	966.39	962.383	0
1000_63_1	1-Tert-butoxybutane	293.1	761.8	759.019	0
1000_63_1	1-Tert-butoxybutane	288.15	767.2	763.126	0
1000_63_1	1-Tert-butoxybutane	308.14	749.2	746.447	0
1000_63_1	1-Tert-butoxybutane	298.15	759.36	754.812	0
1000_86_8	1,3-Pentadiene, 2,4-dimethyl-	293.14	736.8	726.075	0
100055_02_5	2-CYANO-3-ETHYL-2-HEXENOIC ACID, ETHYL ESTER	293.14	976.8	974.601	1
100055_02_5	2-CYANO-3-ETHYL-2-HEXENOIC ACID, ETHYL ESTER	335.02	942.4	938.485	1
100055_02_5	2-CYANO-3-ETHYL-2-HEXENOIC ACID, ETHYL ESTER	359.42	922.1	917.909	1
1001_89_4	Heptane, 2-chloro-	295.14	865.1	861.196	0
1002_36_4	2-Heptyn-1-ol	293.14	886.8	886.86	0
1002_36_4	2-Heptyn-1-ol	298.14	883.2	882.622	0
1002_36_4	2-Heptyn-1-ol	303.13	879.4	878.389	0
1002_43_3	Undecane, 3-methyl-	298.14	749.1	745.754	0
1002_43_3	Undecane, 3-methyl-	283.15	758.3	755.808	0
1002_43_3	Undecane, 3-methyl-	293.15	751.1	749.129	0
1002_43_3	Undecane, 3-methyl-	303.15	743.9	742.339	0
1002_43_3	Undecane, 3-methyl-	313.15	736.6	735.449	0
1002_43_3	Undecane, 3-methyl-	323.15	729.3	728.469	0
1002_43_3	Undecane, 3-methyl-	333.15	721.9	721.406	0
1002_43_3	Undecane, 3-methyl-	343.15	714.4	714.267	0
1002_43_3	Undecane, 3-methyl-	353.15	707	707.06	0
1002_43_3	Undecane, 3-methyl-	363.15	699.4	699.789	0
1002_43_3	Undecane, 3-methyl-	373.15	691.9	692.461	0
1002_56_8	2-chlorodecane	293.14	870.6	857.775	0
1002_69_3	Decane, 1-chloro-	334.62	837.2	830.885	1
1002_69_3	Decane, 1-chloro-	358.52	818	814.172	1
1002_69_3	Decane, 1-chloro-	289.97	873.2	860.813	1
1002_69_3	Decane, 1-chloro-	315.85	852.4	843.699	1
1002_69_3	Decane, 1-chloro-	346.66	827.7	822.516	1
1002_69_3	Decane, 1-chloro-	356.2	820.5	815.812	1
1002_69_3	Decane, 1-chloro-	378.62	802	799.831	1
1002_69_3	Decane, 1-chloro-	384.99	796.6	795.239	1
1002_69_3	Decane, 1-chloro-	396.07	787.2	787.202	1
1002_69_3	Decane, 1-chloro-	407.97	776.7	778.505	1
1002_69_3	Decane, 1-chloro-	417.05	768.5	771.828	1
1002_69_3	Decane, 1-chloro-	298.15	862.4	855.482	1
1002_69_3	Decane, 1-chloro-	303.15	858.8	852.186	1
1002_69_3	Decane, 1-chloro-	308.15	855.1	848.864	1
1002_69_3	Decane, 1-chloro-	253.15	899.9	883.698	1
1002_69_3	Decane, 1-chloro-	263.15	892.3	877.687	1
1002_69_3	Decane, 1-chloro-	273.15	884.2	871.514	1
1002_69_3	Decane, 1-chloro-	283.15	876.8	865.197	1
1002_69_3	Decane, 1-chloro-	323.15	845.6	838.751	1
1002_69_3	Decane, 1-chloro-	363.15	814.2	810.89	1
1002_69_3	Decane, 1-chloro-	423.15	764.6	767.323	1
10020_43_6	Ethanol, 2-(octyloxy)-	293.15	882.7	877.491	1
10021_92_8	trans-Cyclohexane-1,3-dicarboxylic acid dimethyl ester	293.14	1109.5	1101.22	0
1003_03_8	Cyclopentanamine	273.15	878.41	877.355	0
1003_03_8	Cyclopentanamine	288.14	864.47	863.73	0
1003_03_8	Cyclopentanamine	303.13	850.45	850.104	0
1003_03_8	Cyclopentanamine	298.14	860	854.64	0
1003_09_4	Thiophene, 2-bromo-	293.14	1707.1	1707.24	0
1003_09_4	Thiophene, 2-bromo-	313.13	1678.1	1672.05	0
1003_09_4	Thiophene, 2-bromo-	333.12	1663.2	1639.26	0
1003_09_4	Thiophene, 2-bromo-	358.12	1612.1	1601.05	0
1003_30_1	Furan, 2-ethyltetrahydro-	298.14	849	865.629	0
1003_31_2	2-Thiophenecarbonitrile	293.14	1177.8	1189.66	0
1003_31_2	2-Thiophenecarbonitrile	313.13	1158.6	1166.87	0
1003_31_2	2-Thiophenecarbonitrile	333.12	1138	1144.97	0
1003_31_2	2-Thiophenecarbonitrile	358.12	1112.9	1118.61	0
1003_38_9	Furan, tetrahydro-2,5-dimethyl-	298.15	825.27	848.993	0
1003_64_1	Cyclohexane, ethylidene-	293.14	823	811.214	0
1003_64_1	Cyclohexane, ethylidene-	290.44	823.9	813.692	0
1003_73_2	Pyridine, 3-methyl-, 1-oxide	318.14	1119.4	1075.52	0
1003_73_2	Pyridine, 3-methyl-, 1-oxide	323.14	1115.6	1070.56	0
1003_73_2	Pyridine, 3-methyl-, 1-oxide	348.13	1096.1	1046.09	0
1003_73_2	Pyridine, 3-methyl-, 1-oxide	373.12	1076.5	1022.08	0
1003_73_2	Pyridine, 3-methyl-, 1-oxide	398.12	1056.8	998.45	0
1003_78_7	2,4-Dimethylsulfolane	298.14	1131	1157.07	1
10031_87_5	Acetic acid, 2-ethylbutyl ester	298.14	876.4	877.235	0
100314_88_3	9-DECYNOIC ACID, ETHYL ESTER	293.14	906.6	902.853	0
100314_88_3	9-DECYNOIC ACID, ETHYL ESTER	314.73	889.7	887.654	0
100314_88_3	Unsaturated-Aliphatic-Esters	335.02	873.4	873.136	0
100314_88_3	Unsaturated-Aliphatic-Esters	360.22	853.4	854.849	0
100383_97_9	1,2-dipropylcyclohexene	298.14	868	824.056	0
10048_32_5	(S)-(+)-5,6-dihydro-6-methyl-2H-pryan-2-one	293.09	1078	1067.91	1
1005_68_1	Cyclopentane, (3-methylbutyl)-	298.14	783.7	777.554	0
1005_68_1	Cyclopentane, (3-methylbutyl)-	293.64	786.8	781.062	0
100544_12_5	1-butyl-2-propylcyclohexene	298.14	868	828.499	0
100618_60_8	pyridine-3-carboxylic acid, n-heptyl ester	293.14	1005	998.246	1
100618_60_8	pyridine-3-carboxylic acid, n-heptyl ester	313.13	989	983.29	1
100618_60_8	pyridine-3-carboxylic acid, n-heptyl ester	333.12	973	968.255	1
100618_60_8	pyridine-3-carboxylic acid, n-heptyl ester	358.12	953.1	949.358	1
1007_26_7	Benzene, (2,2-dimethylpropyl)-	291.44	858.1	854.386	0
1007_32_5	1-Phenyl-2-butanone	293.14	987.7	980.433	0
1007_32_5	1-Phenyl-2-butanone	313.53	971.7	962.429	0
1007_32_5	1-Phenyl-2-butanone	333.92	955.6	944.552	0
1007_32_5	1-Phenyl-2-butanone	359.02	934.4	922.689	0
1007_52_9	(2,4-pentadienyl)benzene	293.14	931.2	918.728	0
10074_43_8	p-hexylstyrene	298.14	874.2	879.365	1
1008_17_9	α-Ethyldecalin	310.91	871.3	875.627	0
1008_89_5	Pyridine, 2-phenyl-	293.14	1089.1	1080.55	0
100859_79_8	hexane, 2,3-dibromo-2-methyl-	293.14	1511.6	1518.35	1
10086_64_3	1-Fluoro-2-methylbutane	293.14	790.6	783.281	0
100950_89_8	(3-ethyl-1,3-heptadienyl)benzene	293.14	906	900.393	1
10099_71_5	Diamyl maleate	293.14	974.1	970.36	0
10099_71_5	Diamyl maleate	314.53	957.6	953.791	0
10099_71_5	Diamyl maleate	334.62	941.3	938.246	0
10099_71_5	Diamyl maleate	360.12	920.5	918.533	0
101_02_0	Phosphorous acid, triphenyl ester	298.14	1180	1175.52	0
101_39_3	2-Propenal, 2-methyl-3-phenyl-	298.15	1039	1017.29	0
101_41_7	Benzeneacetic acid, methyl ester	293.14	1067.9	1068.42	0
101_41_7	Benzeneacetic acid, methyl ester	314.43	1047.9	1048.93	0
101_41_7	Benzeneacetic acid, methyl ester	333.62	1030.3	1031.67	0
101_41_7	Benzeneacetic acid, methyl ester	359.82	1006.5	1008.49	0
101_41_7	Benzeneacetic acid, methyl ester	297.99	1062.1	1063.95	0
101_81_5	Diphenylmethane	299.14	1000.8	1007.02	0
101_81_5	Diphenylmethane	404.13	918.1	929.091	0
101_81_5	Diphenylmethane	343.12	967.241	974.721	0
101_81_5	Diphenylmethane	353.12	959.073	967.297	0
101_81_5	Diphenylmethane	363.12	950.933	959.849	0
101_81_5	Diphenylmethane	368.12	947	956.117	0
101_81_5	Diphenylmethane	418.53	908.2	918.223	0
101_81_5	Diphenylmethane	434.64	895	906.028	0
101_81_5	Diphenylmethane	451.44	882.1	893.275	0
101_81_5	Diphenylmethane	464.45	871.1	883.377	0
101_81_5	Diphenylmethane	484.16	856.9	868.347	0
101_81_5	Diphenylmethane	304.13	997.4	1003.39	0
101_81_5	Diphenylmethane	309.33	993.2	999.597	0
101_81_5	Diphenylmethane	318.33	986.1	993.006	0
101_81_5	Diphenylmethane	328.43	978.2	985.578	0
101_81_5	Diphenylmethane	341.72	967.6	975.758	0
101_81_5	Diphenylmethane	359.92	953.5	962.235	0
101_81_5	Diphenylmethane	383.13	935	944.881	0
101_81_5	Diphenylmethane	399.23	922.1	932.782	0
101_81_5	Diphenylmethane	313.14	989.92	996.81	0
101_81_5	Diphenylmethane	333.15	975.5	982.096	0
101_81_5	Diphenylmethane	373.15	943.2	952.357	0
101_81_5	Diphenylmethane	393.15	926.8	937.357	0
101_81_5	Diphenylmethane	413.15	910.1	922.287	0
101_81_5	Diphenylmethane	323.14	985.3	989.473	0
101_83_7	Cyclohexanamine, N-cyclohexyl-	313.73	897.8	905.338	1
101_83_7	Cyclohexanamine, N-cyclohexyl-	333.22	884.2	891.153	1
101_83_7	Cyclohexanamine, N-cyclohexyl-	358.42	866.2	872.677	1
101_83_7	Cyclohexanamine, N-cyclohexyl-	288.15	915.498	923.783	1
101_83_7	Cyclohexanamine, N-cyclohexyl-	293.15	911.705	920.195	1
101_83_7	Cyclohexanamine, N-cyclohexyl-	298.15	907.923	916.598	1
101_83_7	Cyclohexanamine, N-cyclohexyl-	303.15	904.144	912.993	1
101_83_7	Cyclohexanamine, N-cyclohexyl-	308.15	900.372	909.38	1
101_83_7	Cyclohexanamine, N-cyclohexyl-	318.15	892.847	902.13	1
101_83_7	Cyclohexanamine, N-cyclohexyl-	323.15	889.089	898.495	1
101_84_8	Diphenyl ether	309.93	1059.9	1057.84	0
101_84_8	Diphenyl ether	319.93	1051.1	1050.09	0
101_84_8	Diphenyl ether	329.92	1042.4	1042.35	0
101_84_8	Diphenyl ether	303.15	1066	1063.1	0
101_84_8	Diphenyl ether	313.15	1057.4	1055.34	0
101_84_8	Diphenyl ether	323.15	1048.8	1047.59	0
101_84_8	Diphenyl ether	333.15	1040	1039.84	0
101_84_8	Diphenyl ether	343.15	1031.4	1032.1	0
101_84_8	Diphenyl ether	363.15	1014	1016.63	0
101_84_8	Diphenyl ether	353.15	1022.3	1024.36	0
101_84_8	Diphenyl ether	373.15	1005.2	1008.9	0
101_97_3	Benzeneacetic acid, ethyl ester	284.84	1038.5	1041.28	0
101_97_3	Benzeneacetic acid, ethyl ester	277.15	1055.5	1048.28	0
101_97_3	Benzeneacetic acid, ethyl ester	278.15	1054.47	1047.37	0
101_97_3	Benzeneacetic acid, ethyl ester	293.14	1040.6	1033.76	0
101_97_3	Benzeneacetic acid, ethyl ester	315.13	1013.1	1014.06	0
101_97_3	Benzeneacetic acid, ethyl ester	334.62	994.8	996.808	0
101_97_3	Benzeneacetic acid, ethyl ester	288.15	1036.35	1038.28	0
101_97_3	Benzeneacetic acid, ethyl ester	298.15	1026.96	1029.25	0
101_97_3	Benzeneacetic acid, ethyl ester	308.15	1017.6	1020.29	0
101_97_3	Benzeneacetic acid, ethyl ester	318.15	1008.26	1011.38	0
101_97_3	Benzeneacetic acid, ethyl ester	328.15	998.93	1002.52	0
101_97_3	Benzeneacetic acid, ethyl ester	338.15	989.61	993.701	0
101_97_3	Benzeneacetic acid, ethyl ester	348.15	980.28	984.927	0
101_97_3	Benzeneacetic acid, ethyl ester	358.15	970.95	976.191	0
10100_95_5	Amyl-t-butyl ether	288.15	775.1	770.43	0
10100_95_5	Amyl-t-butyl ether	298.14	766.4	762.488	0
10100_95_5	Amyl-t-butyl ether	308.14	757.8	754.468	0
1012_72_2	Benzene, 1,4-bis(1,1-dimethylethyl)-	373.13	805.9	805.04	0
1012_72_2	Benzene, 1,4-bis(1,1-dimethylethyl)-	398.12	785.7	785.583	0
1012_72_2	Benzene, 1,4-bis(1,1-dimethylethyl)-	423.12	765.8	765.988	0
1012_72_2	Benzene, 1,4-bis(1,1-dimethylethyl)-	448.11	745.7	746.293	0
1012_72_2	Benzene, 1,4-bis(1,1-dimethylethyl)-	473.11	724.9	726.497	0
1012_72_2	Benzene, 1,4-bis(1,1-dimethylethyl)-	498.11	702.6	706.624	0
10124_73_9	1-Hexene, 2-chloro-	298.14	888.6	887.544	0
101257_63_0	1-chloro-3-methylhexane	302.13	854	862.613	0
1013_08_7	Phenanthrene, 1,2,3,4-tetrahydro-	313.13	1060.1	1039.03	0
10137_90_3	5-ethylnon-3-en-2-one	293.14	905.9	849.381	0
1014_41_1	1,4-bis(1-methylpropyl)benzene	298.14	854.8	879.918	1
1014_41_1	1,4-bis(1-methylpropyl)benzene	293.14	862	883.618	1
1014_60_4	Benzene, 1,3-bis(1,1-dimethylethyl)-	293.14	858.9	866.405	0
1014_60_4	Benzene, 1,3-bis(1,1-dimethylethyl)-	298.14	854.7	862.515	0
10143_23_4	1-Pentanol, 2,3-dimethyl-	296.14	836	841.567	0
101432_90_0	5-ethyl-4-isobutyl-2-methylnonane	293.14	783.6	792.189	0
101452_98_6	2-propyldodecanoic acid	298.14	877.6	889.265	0
101452_98_6	2-propyldodecanoic acid	343.12	845.1	857.535	0
101654_30_2	hexane, 3-chloro-2,3-dimethyl-	293.14	886.9	882.181	0
10199_67_4	1-Benzylpyrazole	298.15	1078	1091.56	0
102_09_0	Diphenyl carbonate	358.15	1113.14	1101.68	0
102_25_0	Benzene, 1,3,5-triethyl-	293.14	863.3	874.096	1
102_25_0	Benzene, 1,3,5-triethyl-	290.14	863.6	876.506	1
102_25_0	Benzene, 1,3,5-triethyl-	298.14	856.8	870.076	1
102_25_0	Benzene, 1,3,5-triethyl-	273.15	877.2	890.122	1
102_25_0	Benzene, 1,3,5-triethyl-	323.14	839.1	849.919	1
102_25_0	Benzene, 1,3,5-triethyl-	348.13	819.5	829.689	1
102_25_0	Benzene, 1,3,5-triethyl-	373.12	799.4	809.395	1
102_25_0	Benzene, 1,3,5-triethyl-	398.12	778.3	789.041	1
102_25_0	Benzene, 1,3,5-triethyl-	423.12	755.2	768.643	1
102_25_0	Benzene, 1,3,5-triethyl-	448.11	733.7	748.217	1
102_25_0	Benzene, 1,3,5-triethyl-	473.11	711.8	727.753	1
102_27_2	Benzenamine, N-ethyl-3-methyl-	298.1	957	930.876	0
102_69_2	1-Propanamine, N,N-dipropyl-	291.34	756.3	759.654	0
102_69_2	1-Propanamine, N,N-dipropyl-	277.55	770.3	769.561	0
102_69_2	1-Propanamine, N,N-dipropyl-	283.09	763.2	765.601	0
102_69_2	1-Propanamine, N,N-dipropyl-	295.94	753.5	756.315	0
102_69_2	1-Propanamine, N,N-dipropyl-	348.12	713	717.474	0
102_69_2	1-Propanamine, N,N-dipropyl-	202.1	830	819.75	0
102_69_2	1-Propanamine, N,N-dipropyl-	298.74	753	754.274	0
102_69_2	1-Propanamine, N,N-dipropyl-	328.63	729	732.165	0
102_69_2	1-Propanamine, N,N-dipropyl-	353.32	709	713.524	0
102_69_2	1-Propanamine, N,N-dipropyl-	365.32	699	704.362	0
102_69_2	1-Propanamine, N,N-dipropyl-	389.23	680	685.941	0
102_69_2	1-Propanamine, N,N-dipropyl-	409.13	664	670.464	0
102_69_2	1-Propanamine, N,N-dipropyl-	422.63	653	659.899	0
102_69_2	1-Propanamine, N,N-dipropyl-	315.13	741.1	742.221	0
102_69_2	1-Propanamine, N,N-dipropyl-	335.12	725.8	727.295	0
102_69_2	1-Propanamine, N,N-dipropyl-	361.02	705.6	707.652	0
102_69_2	1-Propanamine, N,N-dipropyl-	213.2	818.9	812.949	0
102_69_2	1-Propanamine, N,N-dipropyl-	233.18	803.8	800.104	0
102_69_2	1-Propanamine, N,N-dipropyl-	253.17	788.2	786.633	0
102_69_2	1-Propanamine, N,N-dipropyl-	273.15	772.4	772.687	0
102_69_2	1-Propanamine, N,N-dipropyl-	373.12	691.7	698.376	0
102_69_2	1-Propanamine, N,N-dipropyl-	393.13	674.4	682.918	0
102_69_2	1-Propanamine, N,N-dipropyl-	413.13	657	667.339	0
102_69_2	1-Propanamine, N,N-dipropyl-	303.15	749.15	751.049	0
102_69_2	1-Propanamine, N,N-dipropyl-	308.15	745.8	747.376	0
102_69_2	1-Propanamine, N,N-dipropyl-	318.15	737.7	739.981	0
102_69_2	1-Propanamine, N,N-dipropyl-	323.15	733.75	736.26	0
102_76_1	Triacetin	294.14	1161	1152.74	0
102_76_1	Triacetin	308.33	1144	1137.84	0
102_76_1	Triacetin	323.33	1127	1122.5	0
102_76_1	Triacetin	338.12	1110	1107.72	0
102_76_1	Triacetin	348.32	1100	1097.72	0
102_76_1	Triacetin	363.32	1085	1083.24	0
102_76_1	Triacetin	372.92	1075	1074.11	0
102_76_1	Triacetin	388.13	1060	1059.85	0
102_76_1	Triacetin	398.13	1051	1050.58	0
102_76_1	Triacetin	412.93	1040	1037.04	0
102_76_1	Triacetin	428.14	1028	1023.29	0
102_76_1	Triacetin	442.34	1016	1010.6	0
102_76_1	Triacetin	458.35	1007	996.441	0
102_76_1	Triacetin	318.14	1130.9	1127.76	0
102_76_1	Triacetin	278	1175.5	1170.22	0
102_76_1	Triacetin	283	1169.8	1164.74	0
102_76_1	Triacetin	303.15	1147.3	1143.24	0
102_76_1	Triacetin	313.15	1136.6	1132.87	0
102_79_4	Ethanol, 2,2'-(butylimino)bis-	298.15	966.48	980.578	0
102_79_4	Ethanol, 2,2'-(butylimino)bis-	303.15	962.45	976.644	0
102_79_4	Ethanol, 2,2'-(butylimino)bis-	313.15	955.18	968.791	0
102_79_4	Ethanol, 2,2'-(butylimino)bis-	333.15	940.19	953.139	0
102_79_4	Ethanol, 2,2'-(butylimino)bis-	353.15	925.65	937.548	0
102_82_9	Tributylamine	273.15	791	790.628	0
102_82_9	Tributylamine	283.14	785.713	783.977	0
102_82_9	Tributylamine	353.12	733.294	735.113	0
102_82_9	Tributylamine	373.12	717.293	720.613	0
102_82_9	Tributylamine	296.04	776.1	775.245	0
102_82_9	Tributylamine	315.13	763.4	762.068	0
102_82_9	Tributylamine	334.92	748.7	748.133	0
102_82_9	Tributylamine	360.22	730	729.987	0
102_82_9	Tributylamine	363.02	728	727.958	0
102_82_9	Tributylamine	233.18	823.7	816.011	0
102_82_9	Tributylamine	253.17	808.6	803.591	0
102_82_9	Tributylamine	393.13	702	705.934	0
102_82_9	Tributylamine	413.13	686.1	691.116	0
102_82_9	Tributylamine	433.14	669.9	676.164	0
102_82_9	Tributylamine	453.14	652.8	661.11	0
102_82_9	Tributylamine	473.15	635.3	645.953	0
102_82_9	Tributylamine	298.15	774.23	773.803	0
102_82_9	Tributylamine	303.15	770.1	770.371	0
102_82_9	Tributylamine	308.15	766.2	766.918	0
102_82_9	Tributylamine	318.15	759.74	759.958	0
102_82_9	Tributylamine	323.15	756.04	756.451	0
102_82_9	Tributylamine	328.15	752.58	752.928	0
102_82_9	Tributylamine	288.15	781.336	780.604	0
102_85_2	Phosphorous acid, tributyl ester	293.14	914.6	925.331	0
102_85_2	Phosphorous acid, tributyl ester	313.13	898.6	909.184	0
102_85_2	Phosphorous acid, tributyl ester	333.12	881.4	892.943	0
102_85_2	Phosphorous acid, tributyl ester	358.12	860.6	872.526	0
102_86_3	1-Hexanamine, N,N-dihexyl-	303.15	794.33	792.541	1
102_86_3	1-Hexanamine, N,N-dihexyl-	308.15	791.02	789.319	1
102_86_3	1-Hexanamine, N,N-dihexyl-	313.15	787.73	786.075	1
102_86_3	1-Hexanamine, N,N-dihexyl-	318.15	784.46	782.81	1
102_86_3	1-Hexanamine, N,N-dihexyl-	323.15	781.15	779.526	1
102_87_4	Tridodecylamine	298.15	821.5	829.664	0
102_87_4	Tridodecylamine	303.15	818.34	826.506	0
102_87_4	Tridodecylamine	308.15	815.25	823.327	0
102_87_4	Tridodecylamine	313.15	812.18	820.129	0
102_87_4	Tridodecylamine	318.15	809.12	816.913	0
102_87_4	Tridodecylamine	323.15	805.94	813.68	0
1020_14_0	1,4-Bis(2-pentyl)benzene	293.14	863	881.057	0
10203_28_8	2-Dodecanol	293.14	829.3	824.767	0
10203_28_8	2-Dodecanol	298.14	825.8	821.406	0
10203_28_8	2-Dodecanol	303.13	822.3	818.027	0
10203_28_8	2-Dodecanol	308.13	818.7	814.619	0
10203_28_8	2-Dodecanol	313.13	815.1	811.189	0
10203_28_8	2-Dodecanol	318.13	811.5	807.738	0
10203_28_8	2-Dodecanol	323.13	808	804.268	0
10203_28_8	2-Dodecanol	328.13	804.6	800.778	0
10203_28_8	2-Dodecanol	333.12	800.6	797.278	0
10203_28_8	2-Dodecanol	338.12	796.9	793.753	0
10203_28_8	2-Dodecanol	343.12	793.3	790.211	0
10203_28_8	2-Dodecanol	348.12	789.4	786.654	0
10203_28_8	2-Dodecanol	353.12	785.8	783.082	0
10203_28_8	2-Dodecanol	358.12	781.8	779.495	0
10203_28_8	2-Dodecanol	363.12	777.8	775.894	0
10203_30_2	3-Dodecanol	353.12	783.3	784.753	0
10203_30_2	3-Dodecanol	293.14	831.6	826.644	0
10203_30_2	3-Dodecanol	298.14	828	823.257	0
10203_30_2	3-Dodecanol	303.13	824.3	819.853	0
10203_30_2	3-Dodecanol	308.13	820.6	816.422	0
10203_30_2	3-Dodecanol	313.13	816.9	812.971	0
10203_30_2	3-Dodecanol	318.13	813.3	809.501	0
10203_30_2	3-Dodecanol	323.13	809.7	806.013	0
10203_30_2	3-Dodecanol	328.13	805.8	802.508	0
10203_30_2	3-Dodecanol	333.12	801.9	798.993	0
10203_30_2	3-Dodecanol	338.12	798.1	795.455	0
10203_30_2	3-Dodecanol	343.12	794.3	791.902	0
10203_30_2	3-Dodecanol	348.12	790.4	788.334	0
10203_30_2	3-Dodecanol	358.12	782.6	781.158	0
10203_30_2	3-Dodecanol	363.12	778.7	777.551	0
10203_32_4	4-Dodecanol	293.14	829.2	825.397	0
10203_32_4	4-Dodecanol	298.14	825.5	821.965	0
10203_32_4	4-Dodecanol	303.13	821.9	818.519	0
10203_32_4	4-Dodecanol	308.13	818.3	815.046	0
10203_32_4	4-Dodecanol	313.13	814.6	811.554	0
10203_32_4	4-Dodecanol	318.13	810.9	808.044	0
10203_32_4	4-Dodecanol	323.13	807.3	804.517	0
10203_32_4	4-Dodecanol	328.13	803.4	800.973	0
10203_32_4	4-Dodecanol	333.12	799.6	797.421	0
10203_32_4	4-Dodecanol	338.12	795.7	793.847	0
10203_32_4	4-Dodecanol	343.12	791.9	790.258	0
10203_32_4	4-Dodecanol	348.12	788.1	786.656	0
10203_32_4	4-Dodecanol	353.12	784.1	783.041	0
10203_32_4	4-Dodecanol	358.12	780.1	779.413	0
10203_32_4	4-Dodecanol	363.12	776.1	775.773	0
10203_33_5	5-Dodecanol	293.14	829.5	824.514	1
10203_33_5	5-Dodecanol	298.14	826	821.065	1
10203_33_5	5-Dodecanol	303.13	822.5	817.602	1
10203_33_5	5-Dodecanol	308.13	818.9	814.114	1
10203_33_5	5-Dodecanol	313.13	815.4	810.607	1
10203_33_5	5-Dodecanol	318.13	811.7	807.082	1
10203_33_5	5-Dodecanol	323.13	807.9	803.541	1
10203_33_5	5-Dodecanol	328.13	804.1	799.984	1
10203_33_5	5-Dodecanol	333.12	800.3	796.419	1
10203_33_5	5-Dodecanol	338.12	796.3	792.832	1
10203_33_5	5-Dodecanol	343.12	792.3	789.231	1
10203_33_5	5-Dodecanol	348.12	788.6	785.617	1
10203_33_5	5-Dodecanol	353.12	784.8	781.99	1
10203_33_5	5-Dodecanol	358.12	780.7	778.351	1
10203_33_5	5-Dodecanol	363.12	776.6	774.701	1
102116_45_0	Other-Saturated-Aliphatic-Esters	303	1038.6	1044.04	0
102116_45_0	Other-Saturated-Aliphatic-Esters	313	1031	1034.78	0
102116_45_0	Other-Saturated-Aliphatic-Esters	323	1022.6	1025.62	0
102116_45_0	Other-Saturated-Aliphatic-Esters	333	1013.8	1016.57	0
102116_45_0	Other-Saturated-Aliphatic-Esters	343	1005.5	1007.6	0
102116_45_0	Other-Saturated-Aliphatic-Esters	353	997	998.721	0
102116_45_0	Other-Saturated-Aliphatic-Esters	363	989.7	989.916	0
102116_45_0	Other-Saturated-Aliphatic-Esters	373	980.8	981.182	0
102116_45_0	Other-Saturated-Aliphatic-Esters	383	971.3	972.512	0
102116_45_0	Other-Saturated-Aliphatic-Esters	393	962.6	963.902	0
102116_45_0	Other-Saturated-Aliphatic-Esters	403	954.4	955.347	0
102116_45_0	Other-Saturated-Aliphatic-Esters	413	945.9	946.843	0
102166_56_3	3-methyl-3,5-diphenylheptane	293.14	966.5	956.11	1
102175_39_3	Unsaturated-Aliphatic-Esters	293.14	965.5	958.215	0
102175_39_3	Unsaturated-Aliphatic-Esters	313.13	950.8	944.186	0
102175_39_3	Unsaturated-Aliphatic-Esters	333.12	935.5	930.057	0
102175_39_3	Unsaturated-Aliphatic-Esters	358.12	916.5	912.273	0
10222_95_4	Benzene, 1,2,4-trimethyl-5-(1-methylethyl)-	294.14	879.5	874.92	0
10224_72_3	Other-Saturated-Aliphatic-Esters	293.14	1119.8	1114.57	0
10224_72_3	Other-Saturated-Aliphatic-Esters	335.62	1078	1068.36	0
10224_72_3	Other-Saturated-Aliphatic-Esters	358.92	1050.9	1044.14	0
10224_72_3	Other-Saturated-Aliphatic-Esters	313.33	1098.1	1092.23	0
10224_72_3	Other-Saturated-Aliphatic-Esters	365.02	1046.4	1037.91	0
10224_91_6	Benzene, 1,1'-ethylidenebis[4-ethyl-	293.14	964.6	977.264	0
10226_07_0	Polyfunctional-C,H,O,S	293.14	1001.9	1014.2	0
10226_07_0	Polyfunctional-C,H,O,S	314.13	985.5	995.098	0
10226_07_0	Polyfunctional-C,H,O,S	333.92	969.1	977.265	0
10226_07_0	Polyfunctional-C,H,O,S	360.52	947.5	953.51	0
102276_59_5	(S)-ethyl 3-methylheptanoate	297.14	862	866.8	1
10228_54_3	Polyfunctional-Esters	293.14	961.6	951.19	0
10228_54_3	Polyfunctional-Esters	313.13	942.1	933.252	0
10228_54_3	Polyfunctional-Esters	333.12	922.9	915.436	0
10228_54_3	Polyfunctional-Esters	358.12	898.6	893.297	0
102312_39_0	pentane, 2-chloro-2,3,4-trimethyl-	293.14	888	878.424	1
10233_13_3	Dodecanoic acid, 1-methylethyl ester	293.14	853.6	849.224	0
10233_13_3	Dodecanoic acid, 1-methylethyl ester	310.93	839.9	837.15	0
10233_13_3	Dodecanoic acid, 1-methylethyl ester	333.12	823.2	821.747	0
10233_13_3	Dodecanoic acid, 1-methylethyl ester	372.02	793.2	794.021	0
102370_18_3	1-ethyl-2-methylcyclohexanol	273.15	922	933.058	0
10250_48_3	Butanoic acid, 3,3-dimethyl-, methyl ester	293.14	871	877.378	0
10258_96_5	2-nonenoic acid, propyl ester	293.14	905.52	881.262	1
10258_96_5	2-nonenoic acid, propyl ester	298.14	902.3	877.503	1
10258_96_5	2-nonenoic acid, propyl ester	373.07	837	820.046	1
10258_96_5	2-nonenoic acid, propyl ester	453.14	769.2	757.139	1
10259_22_0	Ethyl-3-methoxybenzoate	277.15	1114.7	1108.87	0
10259_22_0	Ethyl-3-methoxybenzoate	278.15	1113.77	1107.87	0
10259_22_0	Ethyl-3-methoxybenzoate	283.14	1109.11	1102.9	0
10259_22_0	Ethyl-3-methoxybenzoate	288.14	1104.45	1097.96	0
10259_22_0	Ethyl-3-methoxybenzoate	293.14	1099.89	1093.05	0
10259_22_0	Ethyl-3-methoxybenzoate	298.14	1095.47	1088.18	0
10273_89_9	2-(o-tolyl)pyridine	293.14	1062.1	1064.05	0
10275_66_8	3-octylbicyclo[4.4.0]decane	293.14	868.5	873.577	0
10275_66_8	3-octylbicyclo[4.4.0]decane	310.91	856.7	861.592	0
10275_66_8	3-octylbicyclo[4.4.0]decane	339.32	838.2	842.032	0
102839_08_7	dihydro-3-Cyclopentene-1-acetic acid,2,2,3-trimethyl-, ethyl ester	252.07	961	969.274	0
102839_08_7	dihydro-3-Cyclopentene-1-acetic acid,2,2,3-trimethyl-, ethyl ester	273.1	945	951.124	0
102839_08_7	dihydro-3-Cyclopentene-1-acetic acid,2,2,3-trimethyl-, ethyl ester	298.44	924	929.499	0
102839_08_7	dihydro-3-Cyclopentene-1-acetic acid,2,2,3-trimethyl-, ethyl ester	313.53	912	916.723	0
102839_08_7	dihydro-3-Cyclopentene-1-acetic acid,2,2,3-trimethyl-, ethyl ester	327.23	901	905.179	0
102839_08_7	dihydro-3-Cyclopentene-1-acetic acid,2,2,3-trimethyl-, ethyl ester	348.62	884	887.244	0
102839_08_7	dihydro-3-Cyclopentene-1-acetic acid,2,2,3-trimethyl-, ethyl ester	368.12	869	870.976	0
102839_08_7	dihydro-3-Cyclopentene-1-acetic acid,2,2,3-trimethyl-, ethyl ester	388.33	852	854.183	0
102839_08_7	dihydro-3-Cyclopentene-1-acetic acid,2,2,3-trimethyl-, ethyl ester	407.93	837	837.955	0
102839_08_7	dihydro-3-Cyclopentene-1-acetic acid,2,2,3-trimethyl-, ethyl ester	426.14	822	822.921	0
102839_08_7	dihydro-3-Cyclopentene-1-acetic acid,2,2,3-trimethyl-, ethyl ester	449.24	804	803.902	0
102839_08_7	dihydro-3-Cyclopentene-1-acetic acid,2,2,3-trimethyl-, ethyl ester	467.15	789	789.192	0
102877_00_9	4,5,5-trimethyl-2-hexene	298.14	738.2	744.501	0
10288_13_8	Butane, 1,2-dibromo-3-methyl-	293.14	1677.6	1687.15	0
102880_60_4	3,7-dimethyl-1,3-octanediol	293.14	916.5	914.482	1
10289_68_6	3-Tridecanol	353.12	786.5	786.628	0
102896_48_0	10-pentyleicosane	295.64	798.1	806.662	0
102943_96_4	p-bis(1,1,3,3-tetramethylbutyl)benzene	293.14	883.1	859.084	0
102944_03_6	3,3-dimethyldodecanoic acid	298.14	884.1	885.436	0
103_08_2	2-Nonanol, 5-ethyl-	303.13	826.7	826.528	0
103_09_3	Acetic acid, 2-ethylhexyl ester	283.46	880.38	881.516	1
103_09_3	Acetic acid, 2-ethylhexyl ester	293.46	871.89	873.598	1
103_09_3	Acetic acid, 2-ethylhexyl ester	303.41	862.94	865.703	1
103_09_3	Acetic acid, 2-ethylhexyl ester	313.34	854.53	857.808	1
103_09_3	Acetic acid, 2-ethylhexyl ester	308.15	859.15	861.936	1
103_09_3	Acetic acid, 2-ethylhexyl ester	318.15	850.39	853.979	1
103_09_3	Acetic acid, 2-ethylhexyl ester	328.15	841.61	846.008	1
103_09_3	Acetic acid, 2-ethylhexyl ester	333.15	837.2	842.018	1
103_09_3	Acetic acid, 2-ethylhexyl ester	338.15	832.78	838.025	1
103_09_3	Acetic acid, 2-ethylhexyl ester	343.15	828.35	834.029	1
103_09_3	Acetic acid, 2-ethylhexyl ester	358.15	814.98	822.026	1
103_09_3	Acetic acid, 2-ethylhexyl ester	363.15	810.49	818.02	1
103_09_3	Acetic acid, 2-ethylhexyl ester	323.16	846.08	849.987	1
103_09_3	Acetic acid, 2-ethylhexyl ester	353.16	819.54	826.021	1
103_09_3	Acetic acid, 2-ethylhexyl ester	383.15	792.46	801.974	1
103_09_3	Acetic acid, 2-ethylhexyl ester	393.16	783.27	793.932	1
103_11_7	2-Ethylhexyl acrylate	293.14	885.2	885.348	1
103_11_7	2-Ethylhexyl acrylate	308.15	875	873.898	1
103_23_1	Hexanedioic acid, bis(2-ethylhexyl) ester	298.15	925.741	915.951	0
103_23_1	Hexanedioic acid, bis(2-ethylhexyl) ester	288.17	929.21	923.085	0
103_23_1	Hexanedioic acid, bis(2-ethylhexyl) ester	308.04	914.16	908.863	0
103_23_1	Hexanedioic acid, bis(2-ethylhexyl) ester	318.17	906.52	901.586	0
103_23_1	Hexanedioic acid, bis(2-ethylhexyl) ester	327.82	899.18	894.639	0
103_23_1	Hexanedioic acid, bis(2-ethylhexyl) ester	337.95	892.02	887.332	0
103_23_1	Hexanedioic acid, bis(2-ethylhexyl) ester	348.1	884.57	879.997	0
103_23_1	Hexanedioic acid, bis(2-ethylhexyl) ester	357.79	877.53	872.983	0
103_23_1	Hexanedioic acid, bis(2-ethylhexyl) ester	367.65	870.4	865.836	0
103_23_1	Hexanedioic acid, bis(2-ethylhexyl) ester	293.15	925.4	919.527	0
103_23_1	Hexanedioic acid, bis(2-ethylhexyl) ester	313.15	910.3	905.194	0
103_23_1	Hexanedioic acid, bis(2-ethylhexyl) ester	333.15	895.3	890.796	0
103_23_1	Hexanedioic acid, bis(2-ethylhexyl) ester	353.15	880.4	876.343	0
103_23_1	Hexanedioic acid, bis(2-ethylhexyl) ester	373.15	865.4	861.845	0
103_25_3	Benzenepropanoic acid, methyl ester	293.14	1043.2	1040.73	0
103_25_3	Benzenepropanoic acid, methyl ester	314.13	1025.4	1022.11	0
103_25_3	Benzenepropanoic acid, methyl ester	333.72	1007.7	1004.94	0
103_25_3	Benzenepropanoic acid, methyl ester	360.42	984.1	981.783	0
103_26_4	2-Propenoic acid, 3-phenyl-, methyl ester	318.13	1062	1060.71	0
103_26_4	2-Propenoic acid, 3-phenyl-, methyl ester	344.12	1038	1038.86	0
103_26_4	2-Propenoic acid, 3-phenyl-, methyl ester	363.72	1020	1022.63	0
103_26_4	2-Propenoic acid, 3-phenyl-, methyl ester	389.33	997	1001.68	0
103_26_4	2-Propenoic acid, 3-phenyl-, methyl ester	408.53	980	986.126	0
103_26_4	2-Propenoic acid, 3-phenyl-, methyl ester	432.84	958	966.603	0
103_26_4	2-Propenoic acid, 3-phenyl-, methyl ester	463.65	930	942.084	0
103_26_4	2-Propenoic acid, 3-phenyl-, methyl ester	484.06	911	925.957	0
103_26_4	2-Propenoic acid, 3-phenyl-, methyl ester	373.07	1015.3	1014.95	0
103_26_4	2-Propenoic acid, 3-phenyl-, methyl ester	453.14	943.7	950.422	0
103_28_6	Propanoic acid, 2-methyl-, phenylmethyl ester	296.14	1005.8	1000.8	1
103_29_7	Bibenzyl	353.72	941.6	944.348	0
103_29_7	Bibenzyl	338.12	954.831	955.736	0
103_29_7	Bibenzyl	343.12	950.815	952.098	0
103_29_7	Bibenzyl	325.13	968.2	965.129	0
103_29_7	Bibenzyl	331.12	958	960.808	0
103_29_7	Bibenzyl	358.12	939	941.117	0
103_29_7	Bibenzyl	393.13	913	915.146	0
103_29_7	Bibenzyl	420.13	891	894.852	0
103_29_7	Bibenzyl	451.14	867	871.317	0
103_29_7	Bibenzyl	374.12	926.2	929.302	0
103_30_0	(E)-Stilbene	400.12	956.3	947.847	0
103_30_0	(E)-Stilbene	406.12	951.7	943.625	0
103_30_0	(E)-Stilbene	410.12	948.7	940.805	0
103_30_0	(E)-Stilbene	416.12	944.3	936.568	0
103_30_0	(E)-Stilbene	418.12	942.8	935.154	0
103_30_0	(E)-Stilbene	423.11	939.1	931.622	0
103_32_2	Benzenemethanamine, N-phenyl-	308.13	1053.85	1043.8	0
103_32_2	Benzenemethanamine, N-phenyl-	328.13	1038	1029.88	0
103_36_6	2-Propenoic acid, 3-phenyl-, ethyl ester	286.04	1055.57	1046.03	0
103_36_6	2-Propenoic acid, 3-phenyl-, ethyl ester	288.14	1053.6	1044.17	0
103_36_6	2-Propenoic acid, 3-phenyl-, ethyl ester	318.13	1028.62	1017.93	0
103_36_6	2-Propenoic acid, 3-phenyl-, ethyl ester	323.13	1024.47	1013.59	0
103_36_6	2-Propenoic acid, 3-phenyl-, ethyl ester	338.12	1011.01	1000.65	0
103_36_6	2-Propenoic acid, 3-phenyl-, ethyl ester	343.12	1006.45	996.354	0
103_36_6	2-Propenoic acid, 3-phenyl-, ethyl ester	348.12	1001.96	992.064	0
103_36_6	2-Propenoic acid, 3-phenyl-, ethyl ester	353.12	997.553	987.782	0
103_36_6	2-Propenoic acid, 3-phenyl-, ethyl ester	368.12	984.614	974.981	0
103_36_6	2-Propenoic acid, 3-phenyl-, ethyl ester	373.12	980.687	970.727	0
103_36_6	2-Propenoic acid, 3-phenyl-, ethyl ester	298.84	1045	1034.76	0
103_36_6	2-Propenoic acid, 3-phenyl-, ethyl ester	328.93	1018	1008.58	0
103_36_6	2-Propenoic acid, 3-phenyl-, ethyl ester	365.12	987	977.536	0
103_36_6	2-Propenoic acid, 3-phenyl-, ethyl ester	389.63	966	956.728	0
103_36_6	2-Propenoic acid, 3-phenyl-, ethyl ester	409.13	953	940.272	0
103_36_6	2-Propenoic acid, 3-phenyl-, ethyl ester	422.63	941	928.924	0
103_36_6	2-Propenoic acid, 3-phenyl-, ethyl ester	449.14	922	906.732	0
103_36_6	2-Propenoic acid, 3-phenyl-, ethyl ester	467.95	909	891.05	0
103_36_6	2-Propenoic acid, 3-phenyl-, ethyl ester	315.13	1031	1020.53	0
103_36_6	2-Propenoic acid, 3-phenyl-, ethyl ester	333.22	1015.8	1004.87	0
103_36_6	2-Propenoic acid, 3-phenyl-, ethyl ester	359.32	993.9	982.483	0
103_41_3	Benzyl cinnamate	373.07	1049.7	1033.26	1
103_41_3	Benzyl cinnamate	453.14	986.9	977.542	1
103_45_7	Acetic acid, 2-phenylethyl ester	295.64	1050.7	1034.6	0
103_49_1	Dibenzylamine	278.15	1040.67	1044.22	0
103_49_1	Dibenzylamine	254.66	1060	1058.59	0
103_49_1	Dibenzylamine	273.1	1045	1047.36	0
103_49_1	Dibenzylamine	298.24	1024	1031.5	0
103_49_1	Dibenzylamine	314.63	1011	1020.88	0
103_49_1	Dibenzylamine	329.13	999	1011.34	0
103_49_1	Dibenzylamine	344.12	988	1001.34	0
103_49_1	Dibenzylamine	389.13	950	970.701	0
103_49_1	Dibenzylamine	403.63	938	960.664	0
103_49_1	Dibenzylamine	419.13	925	949.861	0
103_49_1	Dibenzylamine	435.64	912	938.28	0
103_49_1	Dibenzylamine	449.14	901	928.759	0
103_49_1	Dibenzylamine	469.95	884	914.002	0
103_49_1	Dibenzylamine	482.66	873	904.945	0
103_49_1	Dibenzylamine	501.16	858	891.71	0
103_49_1	Dibenzylamine	283.15	1034.3	1041.08	0
103_49_1	Dibenzylamine	288.15	1030.3	1037.93	0
103_49_1	Dibenzylamine	293.15	1026.2	1034.75	0
103_49_1	Dibenzylamine	303.15	1018.1	1028.34	0
103_49_1	Dibenzylamine	308.15	1014.2	1025.1	0
103_49_1	Dibenzylamine	318.15	1006.3	1018.58	0
103_49_1	Dibenzylamine	323.15	1002.4	1015.29	0
103_49_1	Dibenzylamine	333.15	994.6	1008.67	0
103_49_1	Dibenzylamine	338.15	990.8	1005.34	0
103_49_1	Dibenzylamine	348.15	983.1	998.637	0
103_49_1	Dibenzylamine	353.15	979.3	995.268	0
103_49_1	Dibenzylamine	358.15	975.4	991.886	0
103_49_1	Dibenzylamine	363.15	971.6	988.494	0
103_49_1	Dibenzylamine	368.15	967.8	985.09	0
103_49_1	Dibenzylamine	373.15	964	981.677	0
103_49_1	Dibenzylamine	378.15	960.2	978.253	0
103_49_1	Dibenzylamine	383.15	956.4	974.82	0
103_49_1	Dibenzylamine	393.15	948.8	967.925	0
103_49_1	Dibenzylamine	398.15	945	964.465	0
103_49_1	Dibenzylamine	408.15	937.4	957.521	0
103_49_1	Dibenzylamine	413.15	933.6	954.037	0
103_49_1	Dibenzylamine	423.15	926	947.048	0
103_49_1	Dibenzylamine	428.15	922.2	943.543	0
103_49_1	Dibenzylamine	438.15	914.6	936.513	0
103_49_1	Dibenzylamine	443.15	910.8	932.989	0
103_50_4	Benzene, 1,1'-[oxybis(methylene)]bis-	273.15	1059.88	1053.91	0
103_50_4	Benzene, 1,1'-[oxybis(methylene)]bis-	282.99	1051.1	1047.41	0
103_50_4	Benzene, 1,1'-[oxybis(methylene)]bis-	292.99	1043.63	1040.74	0
103_50_4	Benzene, 1,1'-[oxybis(methylene)]bis-	302.98	1035.13	1034.03	0
103_50_4	Benzene, 1,1'-[oxybis(methylene)]bis-	312.98	1027.37	1027.26	0
103_50_4	Benzene, 1,1'-[oxybis(methylene)]bis-	332.97	1010.49	1013.59	0
103_50_4	Benzene, 1,1'-[oxybis(methylene)]bis-	352.97	994.896	999.764	0
103_50_4	Benzene, 1,1'-[oxybis(methylene)]bis-	372.97	977.957	985.809	0
103_50_4	Benzene, 1,1'-[oxybis(methylene)]bis-	298.2	1039.32	1037.25	0
103_53_7	2-Propenoic acid, 3-phenyl-, 2-phenylethyl ester	373.07	1030.2	1002.91	0
103_53_7	2-Propenoic acid, 3-phenyl-, 2-phenylethyl ester	453.14	966.4	945.834	0
103_63_9	Benzene, (2-bromoethyl)-	293.14	1358.7	1351.94	0
103_63_9	Benzene, (2-bromoethyl)-	314.33	1336	1325.9	0
103_63_9	Benzene, (2-bromoethyl)-	334.22	1314.8	1302.43	0
103_63_9	Benzene, (2-bromoethyl)-	358.82	1288.1	1274.46	0
103_65_1	Benzene, propyl-	294.54	860.5	871.538	0
103_65_1	Benzene, propyl-	283.14	870.196	881.58	0
103_65_1	Benzene, propyl-	281.45	871.9	883.067	0
103_65_1	Benzene, propyl-	178.09	957.35	972.867	0
103_65_1	Benzene, propyl-	189.59	948.28	963.044	0
103_65_1	Benzene, propyl-	227.99	915.82	929.868	0
103_65_1	Benzene, propyl-	250.27	897.52	910.429	0
103_65_1	Benzene, propyl-	311.43	846.89	856.632	0
103_65_1	Benzene, propyl-	349.22	814.8	823.183	0
103_65_1	Benzene, propyl-	403.13	766.06	775.296	0
103_65_1	Benzene, propyl-	315.13	843.4	853.363	0
103_65_1	Benzene, propyl-	334.62	828	836.12	0
103_65_1	Benzene, propyl-	359.12	807.2	814.402	0
103_65_1	Benzene, propyl-	323.14	836.798	846.28	0
103_65_1	Benzene, propyl-	373.12	795.993	801.974	0
103_65_1	Benzene, propyl-	298.15	857.7	868.355	0
103_65_1	Benzene, propyl-	318.15	840.98	850.693	0
103_67_3	Benzenemethanamine, N-methyl-	283.15	952.8	970.853	0
103_67_3	Benzenemethanamine, N-methyl-	288.15	948.4	966.705	0
103_67_3	Benzenemethanamine, N-methyl-	293.15	944	962.556	0
103_67_3	Benzenemethanamine, N-methyl-	298.15	939.6	958.407	0
103_67_3	Benzenemethanamine, N-methyl-	303.15	935.1	954.257	0
103_67_3	Benzenemethanamine, N-methyl-	308.15	930.7	950.108	0
103_67_3	Benzenemethanamine, N-methyl-	313.15	926.4	945.958	0
103_67_3	Benzenemethanamine, N-methyl-	318.15	922	941.808	0
103_67_3	Benzenemethanamine, N-methyl-	323.15	917.6	937.658	0
103_67_3	Benzenemethanamine, N-methyl-	328.15	913.3	933.508	0
103_67_3	Benzenemethanamine, N-methyl-	333.15	908.9	929.358	0
103_67_3	Benzenemethanamine, N-methyl-	338.15	904.5	925.207	0
103_67_3	Benzenemethanamine, N-methyl-	343.15	900	921.056	0
103_67_3	Benzenemethanamine, N-methyl-	348.15	895.6	916.905	0
103_67_3	Benzenemethanamine, N-methyl-	353.15	891.2	912.755	0
103_67_3	Benzenemethanamine, N-methyl-	358.15	886.7	908.603	0
103_67_3	Benzenemethanamine, N-methyl-	363.15	882.3	904.452	0
103_67_3	Benzenemethanamine, N-methyl-	368.15	877.8	900.301	0
103_67_3	Benzenemethanamine, N-methyl-	373.15	873.4	896.149	0
103_67_3	Benzenemethanamine, N-methyl-	378.15	868.9	891.998	0
103_67_3	Benzenemethanamine, N-methyl-	383.15	864.4	887.846	0
103_67_3	Benzenemethanamine, N-methyl-	388.15	860	883.694	0
103_67_3	Benzenemethanamine, N-methyl-	393.15	855.4	879.542	0
103_67_3	Benzenemethanamine, N-methyl-	398.15	851	875.39	0
103_67_3	Benzenemethanamine, N-methyl-	403.15	846.4	871.238	0
103_67_3	Benzenemethanamine, N-methyl-	408.15	841.8	867.086	0
103_67_3	Benzenemethanamine, N-methyl-	413.15	837.3	862.934	0
103_67_3	Benzenemethanamine, N-methyl-	418.15	832.6	858.781	0
103_69_5	Benzenamine, N-ethyl-	291.14	953	951.762	0
103_69_5	Benzenamine, N-ethyl-	278.15	971.875	963.1	0
103_69_5	Benzenamine, N-ethyl-	283.14	967.462	958.744	0
103_69_5	Benzenamine, N-ethyl-	328.13	931.9	919.495	0
103_69_5	Benzenamine, N-ethyl-	343.12	918.021	906.425	0
103_69_5	Benzenamine, N-ethyl-	382.63	885.6	871.988	0
103_69_5	Benzenamine, N-ethyl-	394.53	875.1	861.619	0
103_69_5	Benzenamine, N-ethyl-	407.53	863.7	850.294	0
103_69_5	Benzenamine, N-ethyl-	419.23	853	840.101	0
103_69_5	Benzenamine, N-ethyl-	430.44	842.1	830.337	0
103_69_5	Benzenamine, N-ethyl-	443.34	829.5	819.101	0
103_69_5	Benzenamine, N-ethyl-	458.15	814.9	806.204	0
103_69_5	Benzenamine, N-ethyl-	469.45	803.7	796.363	0
103_69_5	Benzenamine, N-ethyl-	314.63	943.1	931.269	0
103_69_5	Benzenamine, N-ethyl-	334.82	927.3	913.661	0
103_69_5	Benzenamine, N-ethyl-	359.22	908.2	892.39	0
103_69_5	Benzenamine, N-ethyl-	253.17	995.1	984.915	0
103_69_5	Benzenamine, N-ethyl-	273.15	978.4	967.465	0
103_69_5	Benzenamine, N-ethyl-	353.12	911	897.707	0
103_69_5	Benzenamine, N-ethyl-	373.12	894.2	880.276	0
103_69_5	Benzenamine, N-ethyl-	413.13	859.8	845.415	0
103_69_5	Benzenamine, N-ethyl-	433.14	842	827.985	0
103_69_5	Benzenamine, N-ethyl-	453.14	823.7	810.567	0
103_69_5	Benzenamine, N-ethyl-	473.15	804.8	793.141	0
103_69_5	Benzenamine, N-ethyl-	303.15	951.9	941.283	0
103_69_5	Benzenamine, N-ethyl-	323.15	935.9	923.838	0
103_69_5	Benzenamine, N-ethyl-	298.15	956.53	945.645	0
103_69_5	Benzenamine, N-ethyl-	308.15	948.45	936.921	0
103_69_5	Benzenamine, N-ethyl-	293.15	960.77	950.008	0
103_69_5	Benzenamine, N-ethyl-	318.15	939.97	928.198	0
103_70_8	Formamide, N-phenyl-	323.13	1118.73	1102.36	0
103_70_8	Formamide, N-phenyl-	328.13	1114.87	1097.96	0
103_70_8	Formamide, N-phenyl-	333.12	1110.92	1093.59	0
103_70_8	Formamide, N-phenyl-	338.12	1107.11	1089.23	0
103_70_8	Formamide, N-phenyl-	343.12	1103.34	1084.89	0
103_70_8	Formamide, N-phenyl-	348.12	1099.53	1080.56	0
103_70_8	Formamide, N-phenyl-	353.12	1095.79	1076.25	0
103_70_8	Formamide, N-phenyl-	363.12	1086.6	1067.67	0
103_70_8	Formamide, N-phenyl-	378.13	1074.3	1054.9	0
103_71_9	Benzene, isocyanato-	293.14	1095.2	1137.92	0
103_71_9	Benzene, isocyanato-	298.15	1081	1133.07	0
103_72_0	Benzene, isothiocyanato-	277.15	1147.7	1173.85	0
103_72_0	Benzene, isothiocyanato-	278.15	1146.67	1172.87	0
103_72_0	Benzene, isothiocyanato-	288.14	1137.12	1163.15	0
103_72_0	Benzene, isothiocyanato-	293.14	1132.53	1158.35	0
103_72_0	Benzene, isothiocyanato-	286.34	1140	1164.89	0
103_72_0	Benzene, isothiocyanato-	311.93	1114.8	1140.57	0
103_72_0	Benzene, isothiocyanato-	327.93	1100	1125.75	0
103_72_0	Benzene, isothiocyanato-	382.33	1049.3	1077.05	0
103_72_0	Benzene, isothiocyanato-	425.13	1008.3	1040.07	0
103_72_0	Benzene, isothiocyanato-	300.14	1131	1151.67	0
103_73_1	Benzene, ethoxy-	350.72	911	901.365	0
103_73_1	Benzene, ethoxy-	278.15	978.375	969.144	0
103_73_1	Benzene, ethoxy-	252.07	1006	994.025	0
103_73_1	Benzene, ethoxy-	273.45	986	973.602	0
103_73_1	Benzene, ethoxy-	298.34	962	950.105	0
103_73_1	Benzene, ethoxy-	363.72	899	889.38	0
103_73_1	Benzene, ethoxy-	383.13	889	871.55	0
103_73_1	Benzene, ethoxy-	423.23	849	834.916	0
103_73_1	Benzene, ethoxy-	433.64	839	825.443	0
103_73_1	Benzene, ethoxy-	291.14	964.8	956.875	0
103_73_1	Benzene, ethoxy-	330.92	927.7	919.696	0
103_73_1	Benzene, ethoxy-	370.22	890.8	883.401	0
103_73_1	Benzene, ethoxy-	390.13	872.5	865.137	0
103_73_1	Benzene, ethoxy-	410.63	850.9	846.401	0
103_73_1	Benzene, ethoxy-	422.43	838.3	835.644	0
103_73_1	Benzene, ethoxy-	438.14	820.8	821.352	0
103_73_1	Benzene, ethoxy-	360.02	904	892.788	0
103_73_1	Benzene, ethoxy-	303.15	955.5	945.594	0
103_73_1	Benzene, ethoxy-	313.15	946.13	936.24	0
103_73_1	Benzene, ethoxy-	308.15	952.2	940.912	0
103_73_1	Benzene, ethoxy-	318.15	943.04	931.575	0
103_73_1	Benzene, ethoxy-	283.15	974.51	964.413	0
103_73_1	Benzene, ethoxy-	323.15	936.62	926.918	0
103_79_7	Benzyl methyl ketone	293.14	1001.8	1001.75	0
103_79_7	Benzyl methyl ketone	313.43	985	983.345	0
103_79_7	Benzyl methyl ketone	333.02	969	965.762	0
103_79_7	Benzyl methyl ketone	358.42	947	943.186	0
103_79_7	Benzyl methyl ketone	298.15	999.024	997.184	0
103_80_0	Benzeneacetyl chloride	277.15	1185.61	1189.47	0
103_80_0	Benzeneacetyl chloride	278.15	1184.57	1188.45	0
103_80_0	Benzeneacetyl chloride	283.14	1179.39	1183.38	0
103_80_0	Benzeneacetyl chloride	288.14	1174.18	1178.35	0
103_80_0	Benzeneacetyl chloride	293.14	1169.07	1173.36	0
103_80_0	Benzeneacetyl chloride	298.14	1163.97	1168.41	0
103_81_1	Benzeneacetamide	433.14	1017.9	983.259	0
103_81_1	Benzeneacetamide	443.14	1010.5	974.929	0
103_81_1	Benzeneacetamide	453.14	1002.9	966.619	0
103_83_3	Benzenemethanamine, N,N-dimethyl-	283.15	907.6	931.379	0
103_83_3	Benzenemethanamine, N,N-dimethyl-	288.15	903.2	927.507	0
103_83_3	Benzenemethanamine, N,N-dimethyl-	293.15	898.9	923.626	0
103_83_3	Benzenemethanamine, N,N-dimethyl-	298.15	894.6	919.736	0
103_83_3	Benzenemethanamine, N,N-dimethyl-	303.15	890.2	915.837	0
103_83_3	Benzenemethanamine, N,N-dimethyl-	308.15	885.9	911.93	0
103_83_3	Benzenemethanamine, N,N-dimethyl-	313.15	881.7	908.015	0
103_83_3	Benzenemethanamine, N,N-dimethyl-	318.15	877.4	904.094	0
103_83_3	Benzenemethanamine, N,N-dimethyl-	323.15	873.2	900.165	0
103_83_3	Benzenemethanamine, N,N-dimethyl-	328.15	868.9	896.229	0
103_83_3	Benzenemethanamine, N,N-dimethyl-	333.15	864.6	892.287	0
103_83_3	Benzenemethanamine, N,N-dimethyl-	338.15	860.4	888.339	0
103_83_3	Benzenemethanamine, N,N-dimethyl-	343.15	856	884.386	0
103_83_3	Benzenemethanamine, N,N-dimethyl-	348.15	851.8	880.426	0
103_83_3	Benzenemethanamine, N,N-dimethyl-	353.15	847.5	876.462	0
103_83_3	Benzenemethanamine, N,N-dimethyl-	358.15	843.2	872.492	0
103_83_3	Benzenemethanamine, N,N-dimethyl-	363.15	838.9	868.517	0
103_83_3	Benzenemethanamine, N,N-dimethyl-	368.15	834.6	864.538	0
103_83_3	Benzenemethanamine, N,N-dimethyl-	373.15	830.2	860.554	0
103_83_3	Benzenemethanamine, N,N-dimethyl-	378.15	825.9	856.566	0
103_83_3	Benzenemethanamine, N,N-dimethyl-	383.15	821.5	852.573	0
103_83_3	Benzenemethanamine, N,N-dimethyl-	388.15	817.1	848.577	0
103_83_3	Benzenemethanamine, N,N-dimethyl-	393.15	812.7	844.577	0
103_83_3	Benzenemethanamine, N,N-dimethyl-	398.15	808.2	840.573	0
103_83_3	Benzenemethanamine, N,N-dimethyl-	403.15	803.7	836.565	0
103_83_3	Benzenemethanamine, N,N-dimethyl-	408.15	799.2	832.554	0
103_83_3	Benzenemethanamine, N,N-dimethyl-	413.15	794.7	828.54	0
103_83_3	Benzenemethanamine, N,N-dimethyl-	418.15	790.1	824.523	0
103_84_4	Acetamide, N-phenyl-	393.13	1034	996.05	0
103_84_4	Acetamide, N-phenyl-	403.13	1017.9	987.359	0
103_84_4	Acetamide, N-phenyl-	418.13	1005.5	974.383	0
103_84_4	Acetamide, N-phenyl-	433.14	993.3	961.465	0
103036_93_7	10-heptyleicosane	295.64	802.5	811.781	0
103037_27_0	3-heptylpyridine	293.14	895.4	895.173	0
103037_27_0	3-heptylpyridine	313.13	882.2	881.407	0
103037_27_0	3-heptylpyridine	333.12	867	867.326	0
103037_27_0	3-heptylpyridine	358.12	849.8	849.353	0
103048_68_6	1-methyl-4-(1-heptyldodecyl)cyclohexane	310.93	824.1	833.765	0
103165_25_9	10-nonyleicosane	295.64	806	815.614	0
103203_57_2	(4-ethylcyclohexyl)benzene	293.14	932.8	935.638	0
103203_58_3	1,2,3,4-tetrahydro-1,2,3,4-tetramethylnaphthalene	293.14	942.6	945.509	0
103212_91_5	4-isobutyl-2-methylnonadecane	293.14	801.3	806.154	0
10324_58_0	Piperidine, 1-pentyl-	293.14	841.2	847.664	0
10325_40_3	Polyfunctional-C,H,O,Halide	298.14	1058.6	1069.45	0
10325_41_4	Polyfunctional-C,H,O,Halide	298.14	1061	1069.45	0
103394_01_0	1,2-diethylcyclohexene	298.14	831	816.117	0
103394_01_0	1,2-diethylcyclohexene	293.14	845.1	820.428	0
10342_97_9	2-Propanamine, N-methyl-N-(1-methylethyl)-	293.14	753.5	750.205	0
10342_97_9	2-Propanamine, N-methyl-N-(1-methylethyl)-	298.14	749.5	746.396	0
10352_87_1	(E)-2-Butenoic acid propyl ester	293.14	908.2	903.344	0
10352_87_1	(E)-2-Butenoic acid propyl ester	314.73	889.2	883.231	0
10352_87_1	(E)-2-Butenoic acid propyl ester	334.72	870	864.704	0
10352_87_1	(E)-2-Butenoic acid propyl ester	360.12	845.1	841.27	0
10374_74_0	7-Tetradecene	293.14	772.8	775.445	0
10381_61_0	spiro(4.5)decan-6-ol	293.14	996.3	985.49	0
10397_22_5	Polyfunctional-Esters	293.14	920.2	912.825	0
10397_22_5	Polyfunctional-Esters	313.13	902.6	897.024	0
10397_22_5	Polyfunctional-Esters	333.12	885.1	881.156	0
10397_22_5	Polyfunctional-Esters	358.12	863.2	861.233	0
103986_54_5	5-isopropenyl-2,3-dimethyl-1,3-cyclohexadiene	294.24	872.4	856.452	0
103986_54_5	5-isopropenyl-2,3-dimethyl-1,3-cyclohexadiene	288.14	877.6	861.805	0
104_40_5	4-Nonylphenol	293.15	949.3	931.365	0
104_40_5	4-Nonylphenol	313.15	935.7	917.833	0
104_40_5	4-Nonylphenol	333.15	922	904.019	0
104_41_6	p-dodecyltoluene	293.14	856	863.048	0
104_51_8	Benzene, n-butyl-	273.15	876	888.441	0
104_51_8	Benzene, n-butyl-	189.59	942.24	954.667	0
104_51_8	Benzene, n-butyl-	227.99	912.08	924.912	0
104_51_8	Benzene, n-butyl-	250.27	894.38	907.07	0
104_51_8	Benzene, n-butyl-	349.27	813.9	825.004	0
104_51_8	Benzene, n-butyl-	402.93	768.67	779.446	0
104_51_8	Benzene, n-butyl-	429.84	745.55	756.434	0
104_51_8	Benzene, n-butyl-	454.45	724.64	735.313	0
104_51_8	Benzene, n-butyl-	334.72	828.1	837.26	0
104_51_8	Benzene, n-butyl-	359.62	808.3	816.258	0
104_51_8	Benzene, n-butyl-	398.12	772.7	783.549	0
104_51_8	Benzene, n-butyl-	423.11	751	762.197	0
104_51_8	Benzene, n-butyl-	448.11	728.1	740.76	0
104_51_8	Benzene, n-butyl-	328.15	832.29	842.777	0
104_51_8	Benzene, n-butyl-	280.15	870.432	882.691	0
104_51_8	Benzene, n-butyl-	285.15	866.34	878.572	0
104_51_8	Benzene, n-butyl-	290.15	862.378	874.442	0
104_51_8	Benzene, n-butyl-	295.15	858.505	870.303	0
104_51_8	Benzene, n-butyl-	300.15	854.699	866.154	0
104_51_8	Benzene, n-butyl-	305.15	850.941	861.997	0
104_51_8	Benzene, n-butyl-	310.15	847.304	857.832	0
104_51_8	Benzene, n-butyl-	315.15	843.77	853.66	0
104_51_8	Benzene, n-butyl-	320.15	840.426	849.48	0
104_51_8	Benzene, n-butyl-	323.15	838.509	846.968	0
104_51_8	Benzene, n-butyl-	343.15	819.9	830.165	0
104_51_8	Benzene, n-butyl-	353.15	811.7	821.728	0
104_51_8	Benzene, n-butyl-	363.15	803.4	813.27	0
104_51_8	Benzene, n-butyl-	373.15	795	804.792	0
104_52_9	Benzene, (3-chloropropyl)-	298.15	1041.84	1032.71	0
104_54_1	2-Propen-1-ol, 3-phenyl-	350.42	1000.25	1000.63	0
104_54_1	2-Propen-1-ol, 3-phenyl-	308.13	1033.57	1037.3	0
104_54_1	2-Propen-1-ol, 3-phenyl-	313.13	1030.01	1032.92	0
104_54_1	2-Propen-1-ol, 3-phenyl-	318.13	1026.34	1028.56	0
104_54_1	2-Propen-1-ol, 3-phenyl-	323.13	1022.49	1024.21	0
104_54_1	2-Propen-1-ol, 3-phenyl-	328.13	1018.56	1019.87	0
104_54_1	2-Propen-1-ol, 3-phenyl-	333.12	1014.47	1015.55	0
104_54_1	2-Propen-1-ol, 3-phenyl-	338.12	1010.43	1011.22	0
104_54_1	2-Propen-1-ol, 3-phenyl-	343.12	1006.45	1006.91	0
104_54_1	2-Propen-1-ol, 3-phenyl-	353.12	998.233	998.315	0
104_54_1	2-Propen-1-ol, 3-phenyl-	358.12	994.317	994.028	0
104_54_1	2-Propen-1-ol, 3-phenyl-	363.12	990.511	989.75	0
104_54_1	2-Propen-1-ol, 3-phenyl-	368.12	986.923	985.479	0
104_54_1	2-Propen-1-ol, 3-phenyl-	373.12	983.371	981.216	0
104_55_2	2-Propenal, 3-phenyl-	293.14	1049.7	1041.7	0
104_55_2	2-Propenal, 3-phenyl-	298.15	1046	1037.53	0
104_55_2	2-Propenal, 3-phenyl-	308.15	1039	1029.23	0
104_55_2	2-Propenal, 3-phenyl-	318.15	1032	1020.98	0
104_72_3	Benzene, decyl-	298.14	851.89	859.756	0
104_72_3	Benzene, decyl-	303.15	849.1	856.601	0
104_72_3	Benzene, decyl-	313.15	842.1	850.215	0
104_72_3	Benzene, decyl-	323.15	835.1	843.722	0
104_72_3	Benzene, decyl-	333.15	827.8	837.133	0
104_72_3	Benzene, decyl-	343.15	821	830.454	0
104_72_3	Benzene, decyl-	353.15	814	823.694	0
104_76_7	1-Hexanol, 2-ethyl-	273.19	846.382	850.692	0
104_76_7	1-Hexanol, 2-ethyl-	373.61	768.403	772.707	0
104_76_7	1-Hexanol, 2-ethyl-	310.13	820.5	822.307	0
104_76_7	1-Hexanol, 2-ethyl-	293.15	832.1	835.41	0
104_76_7	1-Hexanol, 2-ethyl-	298.2	830.62	831.522	0
104_76_7	1-Hexanol, 2-ethyl-	283.15	839.89	843.084	0
104_76_7	1-Hexanol, 2-ethyl-	288.15	836.26	839.252	0
104_76_7	1-Hexanol, 2-ethyl-	303.15	825.28	827.703	0
104_76_7	1-Hexanol, 2-ethyl-	323.15	810.33	812.205	0
104_76_7	1-Hexanol, 2-ethyl-	328.15	806.52	808.315	0
104_76_7	1-Hexanol, 2-ethyl-	333.15	802.68	804.418	0
104_76_7	1-Hexanol, 2-ethyl-	338.14	798.8	800.524	0
104_76_7	1-Hexanol, 2-ethyl-	343.15	794.87	796.61	0
104_76_7	1-Hexanol, 2-ethyl-	348.15	790.91	792.698	0
104_76_7	1-Hexanol, 2-ethyl-	353.15	786.89	788.781	0
104_76_7	1-Hexanol, 2-ethyl-	358.15	782.83	784.859	0
104_76_7	1-Hexanol, 2-ethyl-	363.15	778.72	780.934	0
104_76_7	1-Hexanol, 2-ethyl-	318.2	814.91	816.051	0
104_85_8	Benzonitrile, 4-methyl-	303.13	976.28	994.791	0
104_85_8	Benzonitrile, 4-methyl-	308.13	972.236	990.612	0
104_85_8	Benzonitrile, 4-methyl-	313.13	968.785	986.44	0
104_85_8	Benzonitrile, 4-methyl-	318.13	965.639	982.276	0
104_85_8	Benzonitrile, 4-methyl-	333.12	951.2	969.827	0
104_85_8	Benzonitrile, 4-methyl-	348.12	939	957.421	0
104_85_8	Benzonitrile, 4-methyl-	323.13	959.372	978.117	0
104_85_8	Benzonitrile, 4-methyl-	353.12	933.951	953.296	0
104_85_8	Benzonitrile, 4-methyl-	373.12	916.819	936.841	0
104_85_8	Benzonitrile, 4-methyl-	393.13	899.539	920.443	0
104_85_8	Benzonitrile, 4-methyl-	413.13	882.11	904.107	0
104_87_0	Benzaldehyde, 4-methyl-	289.84	1019.4	1031.06	1
104_87_0	Benzaldehyde, 4-methyl-	293.14	1020	1028.01	1
104_93_8	Benzene, 1-methoxy-4-methyl-	277.15	984.404	986.372	0
104_93_8	Benzene, 1-methoxy-4-methyl-	278.15	983.475	985.472	0
104_93_8	Benzene, 1-methoxy-4-methyl-	283.14	979.058	980.99	0
104_93_8	Benzene, 1-methoxy-4-methyl-	288.14	974.771	976.512	0
104_93_8	Benzene, 1-methoxy-4-methyl-	293.14	970.43	972.047	0
104_93_8	Benzene, 1-methoxy-4-methyl-	318.08	949.7	949.938	0
104_93_8	Benzene, 1-methoxy-4-methyl-	298.15	965.9	967.584	0
104_94_9	Benzenamine, 4-methoxy-	333.12	1066.38	1064.53	1
104_94_9	Benzenamine, 4-methoxy-	338.12	1061.81	1060.22	1
104_94_9	Benzenamine, 4-methoxy-	343.12	1057.48	1055.91	1
104_94_9	Benzenamine, 4-methoxy-	348.12	1053.32	1051.62	1
104_94_9	Benzenamine, 4-methoxy-	353.12	1049.25	1047.35	1
104_94_9	Benzenamine, 4-methoxy-	358.12	1045.17	1043.08	1
104_94_9	Benzenamine, 4-methoxy-	363.12	1041.19	1038.83	1
1041_82_3	1,5-heptadiene, 3,4-dimethyl-	293.14	746.2	774.579	0
10412_42_7	2,4-dimethyl-3-isopropyl-2-pentene	293.14	768	761.937	0
10412_42_7	2,4-dimethyl-3-isopropyl-2-pentene	298.14	763.7	758.011	0
104256_05_5	4-nonene, 8-methyl-	293.14	740	747.41	1
10431_98_8	Oxazole, 2-ethyl-4,5-dihydro-	298.14	974	969.887	0
10448_26_7	Decanoic acid, hexyl ester	273.15	874.3	865.355	0
10448_26_7	Decanoic acid, hexyl ester	298.14	855.2	848.872	0
10463_48_6	3,4-dibromo-1-butene	293.14	1839	1875.58	0
10463_48_6	3,4-dibromo-1-butene	298.14	1830	1866.4	0
10463_48_6	3,4-dibromo-1-butene	303.13	1816	1857.4	0
10479_26_2	1,2-diphenylhexane	293.14	951.2	966.037	0
10482_56_1	L-α-Terpineol	313.13	921	899.921	1
10482_56_1	L-α-Terpineol	318.13	916.6	895.555	1
10484_11_4	pentyl undecanoate	273.15	875.2	866.073	0
10484_11_4	pentyl undecanoate	298.14	856	849.572	0
104851_42_5	(1-ethyl-2-methyl-1-propenyl)benzene	290.64	888.6	898.233	0
10486_19_8	Tridecanal	291.14	835.6	828.787	1
10498_35_8	Cyclohexane, 1,2-dichloro-, cis-	293.14	1204.2	1199.53	0
105_05_5	Benzene, 1,4-diethyl-	287.14	867.5	885.337	0
105_05_5	Benzene, 1,4-diethyl-	289.44	867.8	883.456	0
105_05_5	Benzene, 1,4-diethyl-	293.14	863.5	880.428	0
105_05_5	Benzene, 1,4-diethyl-	303.13	854.02	872.239	0
105_05_5	Benzene, 1,4-diethyl-	313.13	845.9	864.023	0
105_05_5	Benzene, 1,4-diethyl-	298.15	858	876.323	0
105_13_5	Benzenemethanol, 4-methoxy-	293.14	1108.18	1121.42	0
105_13_5	Benzenemethanol, 4-methoxy-	298.14	1104.34	1116.78	0
105_30_6	1-Pentanol, 2-methyl-	273.15	839.5	842.071	0
105_30_6	1-Pentanol, 2-methyl-	296.84	821.4	822.268	0
105_30_6	1-Pentanol, 2-methyl-	290.74	824.6	827.379	0
105_30_6	1-Pentanol, 2-methyl-	278.15	834.7	837.903	0
105_30_6	1-Pentanol, 2-methyl-	308.13	813.07	812.787	0
105_30_6	1-Pentanol, 2-methyl-	318.13	805.48	804.37	0
105_30_6	1-Pentanol, 2-methyl-	328.13	797.55	795.936	0
105_30_6	1-Pentanol, 2-methyl-	338.12	789.5	787.495	0
105_30_6	1-Pentanol, 2-methyl-	348.12	781.19	779.032	0
105_30_6	1-Pentanol, 2-methyl-	358.12	772.69	770.555	0
105_30_6	1-Pentanol, 2-methyl-	368.12	764.13	762.067	0
105_30_6	1-Pentanol, 2-methyl-	378.13	754.77	753.56	0
105_30_6	1-Pentanol, 2-methyl-	388.13	745.34	745.05	0
105_30_6	1-Pentanol, 2-methyl-	398.13	735.69	736.532	0
105_30_6	1-Pentanol, 2-methyl-	408.13	725.74	728.005	0
105_30_6	1-Pentanol, 2-methyl-	303.15	816.8	816.972	0
105_30_6	1-Pentanol, 2-methyl-	313.15	809.5	808.564	0
105_30_6	1-Pentanol, 2-methyl-	323.15	801.5	800.138	0
105_34_0	Acetic acid, cyano-, methyl ester	274.1	1122	1127.25	0
105_34_0	Acetic acid, cyano-, methyl ester	298.64	1096	1099.25	0
105_34_0	Acetic acid, cyano-, methyl ester	323.13	1070	1072.54	0
105_34_0	Acetic acid, cyano-, methyl ester	343.62	1039	1050.96	0
105_34_0	Acetic acid, cyano-, methyl ester	363.12	1028	1030.94	0
105_34_0	Acetic acid, cyano-, methyl ester	397.63	994	996.533	0
105_34_0	Acetic acid, cyano-, methyl ester	426.24	965	968.81	0
105_34_0	Acetic acid, cyano-, methyl ester	449.64	942	946.571	0
105_34_0	Acetic acid, cyano-, methyl ester	470.15	921	927.351	0
105_36_2	Acetic acid, bromo-, ethyl ester	291.14	1525	1483.09	0
105_36_2	Acetic acid, bromo-, ethyl ester	298.15	1498.86	1472.46	0
105_36_2	Acetic acid, bromo-, ethyl ester	303.15	1490.9	1465.02	0
105_36_2	Acetic acid, bromo-, ethyl ester	308.15	1482.76	1457.68	0
105_36_2	Acetic acid, bromo-, ethyl ester	313.15	1474.43	1450.43	0
105_36_2	Acetic acid, bromo-, ethyl ester	318.15	1466.41	1443.28	0
105_36_2	Acetic acid, bromo-, ethyl ester	323.15	1458.23	1436.22	0
105_36_2	Acetic acid, bromo-, ethyl ester	328.15	1450.18	1429.25	0
105_37_3	Propanoic acid, ethyl ester	273.15	913.9	907.787	0
105_37_3	Propanoic acid, ethyl ester	371.92	796.1	810.882	0
105_37_3	Propanoic acid, ethyl ester	348.15	824.9	833.897	0
105_38_4	Propanoic acid, ethenyl ester	298.2	919	917.178	1
105_39_5	Acetic acid, chloro-, ethyl ester	313.83	1124.8	1112.77	0
105_39_5	Acetic acid, chloro-, ethyl ester	334.72	1099.5	1090.34	0
105_39_5	Acetic acid, chloro-, ethyl ester	359.32	1068.4	1064.64	0
105_39_5	Acetic acid, chloro-, ethyl ester	298.15	1146.1	1130.03	0
105_39_5	Acetic acid, chloro-, ethyl ester	303.15	1139.3	1124.48	0
105_39_5	Acetic acid, chloro-, ethyl ester	308.15	1132.8	1118.97	0
105_39_5	Acetic acid, chloro-, ethyl ester	318.15	1119.24	1108.08	0
105_39_5	Acetic acid, chloro-, ethyl ester	323.15	1112.62	1102.69	0
105_39_5	Acetic acid, chloro-, ethyl ester	328.15	1106.04	1097.33	0
105_40_8	Carbamic acid, methyl-, ethyl ester	293.14	1011.5	982.596	0
105_40_8	Carbamic acid, methyl-, ethyl ester	314.33	992.4	961.156	0
105_40_8	Carbamic acid, methyl-, ethyl ester	334.12	974.4	941.42	0
105_40_8	Carbamic acid, methyl-, ethyl ester	359.62	950.3	916.324	0
105_40_8	Carbamic acid, methyl-, ethyl ester	298.14	1007.5	977.505	0
105_40_8	Carbamic acid, methyl-, ethyl ester	328.14	978.7	947.358	0
105_40_8	Carbamic acid, methyl-, ethyl ester	343.13	963.9	932.514	0
105_40_8	Carbamic acid, methyl-, ethyl ester	373.07	933.8	903.215	0
105_42_0	2-Hexanone, 4-methyl-	298.14	808.5	810.768	1
105_43_1	Pentanoic acid, 3-methyl-	299.14	923	935.251	0
105_43_1	Pentanoic acid, 3-methyl-	273.15	944.1	958.599	0
105_43_1	Pentanoic acid, 3-methyl-	291.14	929.7	942.413	0
105_45_3	Methyl acetoacetate	303.15	1066.8	1049.98	0
105_45_3	Methyl acetoacetate	308.15	1061	1044.66	0
105_45_3	Methyl acetoacetate	328.2	1038.78	1023.69	0
105_45_3	Methyl acetoacetate	338.2	1027.89	1013.41	0
105_45_3	Methyl acetoacetate	348.2	1016.95	1003.25	0
105_46_4	sec-Butyl acetate	273.15	890	898.618	0
105_46_4	sec-Butyl acetate	288.64	875.8	883.973	0
105_46_4	sec-Butyl acetate	315.13	848.8	859.068	0
105_46_4	sec-Butyl acetate	336.62	824.6	838.968	0
105_46_4	sec-Butyl acetate	298.94	865.78	874.27	0
105_46_4	sec-Butyl acetate	332.12	828.6	843.17	0
105_46_4	sec-Butyl acetate	361.12	799.1	816.144	0
105_46_4	sec-Butyl acetate	278.1	886.35	893.931	0
105_46_4	sec-Butyl acetate	308.15	854.72	865.615	0
105_46_4	sec-Butyl acetate	318.15	843.96	856.238	0
105_46_4	sec-Butyl acetate	293.15	871	879.721	0
105_48_6	ClCH2C(O)OCH(CH3)2	298.14	1081.2	1081.93	1
105_53_3	Diethyl malonate	289.94	1058.1	1062.18	0
105_53_3	Diethyl malonate	353.12	990	1001.15	0
105_53_3	Diethyl malonate	253.27	1095	1100.04	0
105_53_3	Diethyl malonate	273.85	1075	1078.51	0
105_53_3	Diethyl malonate	281.64	1068	1070.55	0
105_53_3	Diethyl malonate	298.34	1050	1053.81	0
105_53_3	Diethyl malonate	323.23	1025	1029.5	0
105_53_3	Diethyl malonate	375.12	969	980.733	0
105_53_3	Diethyl malonate	397.63	945	960.174	0
105_53_3	Diethyl malonate	417.13	924	942.592	0
105_53_3	Diethyl malonate	421.83	919	938.382	0
105_53_3	Diethyl malonate	444.14	896	918.532	0
105_53_3	Diethyl malonate	335.32	1010.4	1017.94	0
105_53_3	Diethyl malonate	358.42	987.8	996.196	0
105_53_3	Diethyl malonate	303.15	1043.23	1049.05	0
105_53_3	Diethyl malonate	308.15	1038.29	1044.14	0
105_53_3	Diethyl malonate	313.15	1033.37	1039.26	0
105_53_3	Diethyl malonate	318.15	1028.43	1034.41	0
105_53_3	Diethyl malonate	338.15	1006.5	1015.25	0
105_53_3	Diethyl malonate	348.15	995.631	1005.81	0
105_53_3	Diethyl malonate	293.2	1055.25	1058.92	0
105_54_4	Butanoic acid, ethyl ester	391.93	770.3	787.808	1
105_54_4	Butanoic acid, ethyl ester	318.93	851.5	855.692	1
105_54_4	Butanoic acid, ethyl ester	330.12	839.4	845.229	1
105_54_4	Butanoic acid, ethyl ester	341.82	826.4	834.314	1
105_54_4	Butanoic acid, ethyl ester	333.82	839.4	841.774	1
105_54_4	Butanoic acid, ethyl ester	359.82	811.3	817.567	1
105_54_4	Butanoic acid, ethyl ester	315.14	857.6	859.242	1
105_54_4	Butanoic acid, ethyl ester	303.15	868.83	870.493	1
105_54_4	Butanoic acid, ethyl ester	278.15	894.605	894.071	1
105_54_4	Butanoic acid, ethyl ester	323.15	847.03	851.743	1
105_54_4	Butanoic acid, ethyl ester	348.15	819.1	828.419	1
105_54_4	Butanoic acid, ethyl ester	353.15	813.5	823.767	1
105_54_4	Butanoic acid, ethyl ester	363.15	799.9	814.475	1
105_54_4	Butanoic acid, ethyl ester	373.15	788.5	805.197	1
105_54_4	Butanoic acid, ethyl ester	383.15	776.9	795.932	1
105_54_4	Butanoic acid, ethyl ester	393.15	765.1	786.679	1
105_54_4	Butanoic acid, ethyl ester	293.2	879.18	879.856	1
105_56_6	Ethyl cyanoacetate	256.06	1099	1090.39	0
105_56_6	Ethyl cyanoacetate	273.1	1082	1072.36	0
105_56_6	Ethyl cyanoacetate	298.14	1056	1046.7	0
105_56_6	Ethyl cyanoacetate	308.63	1046	1036.2	0
105_56_6	Ethyl cyanoacetate	344.12	1009	1001.51	0
105_56_6	Ethyl cyanoacetate	363.12	990	983.393	0
105_56_6	Ethyl cyanoacetate	426.14	927	924.897	0
105_56_6	Ethyl cyanoacetate	449.14	904	904.02	0
105_56_6	Ethyl cyanoacetate	474.15	879	881.539	0
105_56_6	Ethyl cyanoacetate	292.24	1065.7	1052.67	0
105_56_6	Ethyl cyanoacetate	293.14	1064.8	1051.75	0
105_56_6	Ethyl cyanoacetate	335.02	1024.5	1010.3	0
105_56_6	Ethyl cyanoacetate	360.62	999	985.762	0
105_56_6	Ethyl cyanoacetate	391.63	968.2	956.66	0
105_56_6	Ethyl cyanoacetate	352.82	1002.5	993.183	0
105_56_6	Ethyl cyanoacetate	384.13	969.6	963.645	0
105_56_6	Ethyl cyanoacetate	400.33	953.6	948.597	0
105_56_6	Ethyl cyanoacetate	414.73	939.1	935.336	0
105_56_6	Ethyl cyanoacetate	429.14	924.5	922.162	0
105_56_6	Ethyl cyanoacetate	444.14	909	908.541	0
105_56_6	Ethyl cyanoacetate	458.95	893.7	895.177	0
105_56_6	Ethyl cyanoacetate	303.15	1051.4	1041.67	0
105_56_6	Ethyl cyanoacetate	313.15	1040.8	1031.71	0
105_56_6	Ethyl cyanoacetate	318.15	1034.7	1026.77	0
105_57_7	Ethane, 1,1-diethoxy-	314.73	804.2	810.889	0
105_57_7	Ethane, 1,1-diethoxy-	333.62	784.3	793.937	0
105_57_7	Ethane, 1,1-diethoxy-	359.42	756.6	770.721	0
105_57_7	Ethane, 1,1-diethoxy-	298.15	821.96	825.729	0
105_57_7	Ethane, 1,1-diethoxy-	308.15	811.48	816.783	0
105_58_8	Diethyl carbonate	334.82	930.2	912.592	0
105_58_8	Diethyl carbonate	358.82	902.4	888.851	0
105_58_8	Diethyl carbonate	273.15	997.2	975.373	0
105_58_8	Diethyl carbonate	373.12	881.633	874.84	0
105_58_8	Diethyl carbonate	393.13	856.495	855.378	0
105_58_8	Diethyl carbonate	293.15	974.63	954.669	0
105_58_8	Diethyl carbonate	278.15	991.22	970.16	0
105_58_8	Diethyl carbonate	288.15	980.16	959.809	0
105_58_8	Diethyl carbonate	308.15	957.8	939.377	0
105_58_8	Diethyl carbonate	318.15	946.43	929.278	0
105_58_8	Diethyl carbonate	323.15	940.77	924.254	0
105_58_8	Diethyl carbonate	283.15	986.1	964.972	0
105_58_8	Diethyl carbonate	303.15	963.4	944.454	0
105_58_8	Diethyl carbonate	343.15	917.4	904.317	0
105_58_8	Diethyl carbonate	353.15	905.6	894.432	0
105_58_8	Diethyl carbonate	328.15	935.12	919.247	0
105_58_8	Diethyl carbonate	363.15	893.71	884.598	0
105_58_8	Diethyl carbonate	301.15	965	946.491	0
105_59_9	Methyldiethanolamine	288.15	1044.5	1046.34	1
105_59_9	Methyldiethanolamine	296.3	1037.1	1039.22	1
105_59_9	Methyldiethanolamine	346.3	999.6	996.325	1
105_59_9	Methyldiethanolamine	373.5	978.4	973.435	1
105_59_9	Methyldiethanolamine	397.6	959.3	953.35	1
105_59_9	Methyldiethanolamine	422.4	939.1	932.838	1
105_59_9	Methyldiethanolamine	445.8	920.5	913.606	1
105_59_9	Methyldiethanolamine	470.9	896.6	893.089	1
105_59_9	Methyldiethanolamine	303.15	1031.5	1033.27	1
105_59_9	Methyldiethanolamine	308.15	1027.9	1028.94	1
105_59_9	Methyldiethanolamine	318.15	1021.3	1020.32	1
105_59_9	Methyldiethanolamine	333.15	1009.8	1007.49	1
105_59_9	Methyldiethanolamine	353.15	994.6	990.536	1
105_59_9	Methyldiethanolamine	298.15	1035.9	1037.61	1
105_59_9	Methyldiethanolamine	383.15	970.22	965.373	1
105_59_9	Methyldiethanolamine	393.15	962.03	957.046	1
105_59_9	Methyldiethanolamine	403.15	953.71	948.747	1
105_59_9	Methyldiethanolamine	413.15	945.29	940.472	1
105_59_9	Methyldiethanolamine	423.15	936.81	932.22	1
105_59_9	Methyldiethanolamine	313.2	1026.7	1024.58	1
105_59_9	Methyldiethanolamine	323.2	1018.9	1015.99	1
105_60_2	Caprolactam	353.13	1012.8	1009.33	0
105_60_2	Caprolactam	373.12	997.4	994.013	0
105_60_2	Caprolactam	398.12	977.6	975.086	0
105_60_2	Caprolactam	448.11	938.1	937.844	0
105_60_2	Caprolactam	473.11	918.4	919.458	0
105_60_2	Caprolactam	498.11	897.3	901.199	0
105_66_8	Butanoic acid, propyl ester	273.15	892.99	891.054	0
105_66_8	Butanoic acid, propyl ester	334.22	832.1	836.882	0
105_66_8	Butanoic acid, propyl ester	359.72	807.3	814.295	0
105_67_9	Phenol, 2,4-dimethyl-	303.13	1011.86	1012.25	0
105_67_9	Phenol, 2,4-dimethyl-	298.15	1011.7	1016.87	0
105_68_0	1-Butanol, 3-methyl-, propanoate	433.64	729.5	751.312	0
105_68_0	1-Butanol, 3-methyl-, propanoate	298.14	865	866.586	0
105_72_6	Ethylene glycol di-n-butyrate	293.15	1000.1	997.302	0
105_72_6	Ethylene glycol di-n-butyrate	298.14	995.3	993.034	0
105_75_9	2-Butenedioic acid (E)-, dibutyl ester	293.14	986.9	992.227	0
105_75_9	2-Butenedioic acid (E)-, dibutyl ester	315.63	967.5	973.686	0
105_75_9	2-Butenedioic acid (E)-, dibutyl ester	334.42	951.3	958.304	0
105_76_0	2-Butenedioic acid (Z)-, dibutyl ester	314.73	977	974.425	1
105_76_0	2-Butenedioic acid (Z)-, dibutyl ester	334.02	960.7	958.631	1
105_76_0	2-Butenedioic acid (Z)-, dibutyl ester	360.02	937.6	937.478	1
105_80_6	Nonanedioic acid, bis(2-methylpropyl) ester	298.09	931	926.706	1
105_82_8	Propane, 1,1'-[ethylidenebis(oxy)]bis-	293.14	830.4	827.241	0
105_82_8	Propane, 1,1'-[ethylidenebis(oxy)]bis-	314.43	809.6	809.577	0
105_82_8	Propane, 1,1'-[ethylidenebis(oxy)]bis-	359.42	756.6	771.75	0
105_87_3	Geranyl acetate	298.14	916.5	900.785	0
105_99_7	Dibutyl adipate	314.73	944.8	940.662	0
105_99_7	Dibutyl adipate	334.62	928.2	925.454	0
105_99_7	Dibutyl adipate	360.22	909.3	905.86	0
105_99_7	Dibutyl adipate	293.15	960.6	957.144	0
105_99_7	Dibutyl adipate	353.15	909.9	911.273	0
105_99_7	Dibutyl adipate	373.15	893	895.957	0
10500_16_0	3-Methoxypropionic acid, pentyl ester	293.14	932.7	935.364	0
10500_16_0	3-Methoxypropionic acid, pentyl ester	313.13	914.4	918.678	0
10500_16_0	3-Methoxypropionic acid, pentyl ester	333.12	897	902.02	0
10500_16_0	3-Methoxypropionic acid, pentyl ester	358.12	874.4	881.222	0
10524_08_0	1-Pentene, 4-chloro-	298.14	879.4	894.526	0
10535_50_9	Other-Saturated-Aliphatic-Esters	303	924.6	930.933	1
10535_50_9	Other-Saturated-Aliphatic-Esters	313	917.7	922.974	1
10535_50_9	Other-Saturated-Aliphatic-Esters	323	911.2	915.053	1
10535_50_9	Other-Saturated-Aliphatic-Esters	333	903.8	907.165	1
10535_50_9	Other-Saturated-Aliphatic-Esters	343	899.1	899.307	1
10535_50_9	Other-Saturated-Aliphatic-Esters	353	890.2	891.478	1
10535_50_9	Other-Saturated-Aliphatic-Esters	363	883	883.674	1
10535_50_9	Other-Saturated-Aliphatic-Esters	373	875.5	875.894	1
10535_50_9	Other-Saturated-Aliphatic-Esters	383	867.8	868.136	1
10535_50_9	Other-Saturated-Aliphatic-Esters	393	861.4	860.398	1
10535_50_9	Other-Saturated-Aliphatic-Esters	403	854.2	852.679	1
10535_50_9	Other-Saturated-Aliphatic-Esters	413	848.6	844.976	1
10544_63_5	Ethyl 2-butenoate	293.15	918.97	915.821	0
10544_63_5	Ethyl 2-butenoate	298.15	912.78	910.962	0
10544_63_5	Ethyl 2-butenoate	303.15	904.98	906.115	0
10544_63_5	Ethyl 2-butenoate	313.15	893.29	896.457	0
10544_63_5	Ethyl 2-butenoate	323.15	885.33	886.842	0
10544_63_5	Ethyl 2-butenoate	333.15	875.78	877.266	0
10544_63_5	Ethyl 2-butenoate	343.15	863.9	867.726	0
10544_95_3	Octadecane, 4-methyl-	293.14	786.05	782.996	0
10544_96_4	Octadecane, 6-methyl-	293.14	785.87	783.067	0
10557_44_5	(Z)-2,5-Dimethylhex-3-ene	298.14	689.6	708.651	0
10574_17_1	Benzene, (1-methylpropoxy)-	294.14	973	924.197	0
10574_37_5	2-Pentene, 2,3-dimethyl-	288.14	724.2	717.701	0
10574_37_5	2-Pentene, 2,3-dimethyl-	287.14	725	718.573	0
10575_87_8	1,2-dichloroheptane	293.14	1062.5	1032.16	0
105902_19_0	2,4,4,7-tetramethyl-2-octene	293.14	768.5	755.122	0
105946_02_9	1,2-dipropylcyclohexane	293.14	818.8	817.096	0
105946_04_1	2,4-dimethyl-3-decene	293.14	758.4	762.266	0
105971_26_4	2-ethyl-1,3,3-trimethylcyclohexene	298.14	847	812.487	0
106_18_3	n-Butyl laurate	273.15	874.7	866.996	0
106_18_3	n-Butyl laurate	298.14	855.5	850.51	0
106_18_3	n-Butyl laurate	293.14	860.3	853.854	0
106_18_3	n-Butyl laurate	313.13	846.6	840.361	0
106_18_3	n-Butyl laurate	333.12	831.6	826.581	0
106_18_3	n-Butyl laurate	359.22	812.7	808.234	0
106_19_4	Hexanedioic acid, dipropyl ester	314.23	962.9	960.532	0
106_19_4	Hexanedioic acid, dipropyl ester	334.62	945.3	944.046	0
106_19_4	Hexanedioic acid, dipropyl ester	359.12	924.3	924.317	0
106_19_4	Hexanedioic acid, dipropyl ester	293.15	979.3	977.653	0
106_19_4	Hexanedioic acid, dipropyl ester	303.15	970.3	969.52	0
106_19_4	Hexanedioic acid, dipropyl ester	323.15	952.4	953.311	0
106_19_4	Hexanedioic acid, dipropyl ester	343.15	934.6	937.168	0
106_19_4	Hexanedioic acid, dipropyl ester	353.15	925.7	929.118	0
106_19_4	Hexanedioic acid, dipropyl ester	363.15	916.7	921.079	0
106_22_9	Citronellol	293.15	855.37	849.549	0
106_23_0	Citronellal	298.2	850.03	841.891	0
106_24_1	2,6-Octadien-1-ol, 3,7-dimethyl-, (E)-	298.14	879.2	868.961	1
106_24_1	2,6-Octadien-1-ol, 3,7-dimethyl-, (E)-	293.15	883.25	872.708	1
106_25_2	2,6-Octadien-1-ol, 3,7-dimethyl-, (Z)-	298.14	873.3	868.961	1
106_27_4	Butanoic acid, 3-methylbutyl ester	315.13	845.6	847.968	0
106_27_4	Butanoic acid, 3-methylbutyl ester	333.92	829.3	832.54	0
106_27_4	Butanoic acid, 3-methylbutyl ester	359.62	805.8	811.343	0
106_27_4	Butanoic acid, 3-methylbutyl ester	293.15	866.13	865.925	0
106_27_4	Butanoic acid, 3-methylbutyl ester	298.15	862.04	861.85	0
106_27_4	Butanoic acid, 3-methylbutyl ester	303.15	859.14	857.769	0
106_27_4	Butanoic acid, 3-methylbutyl ester	308.15	857.08	853.682	0
106_27_4	Butanoic acid, 3-methylbutyl ester	318.15	850.11	845.493	0
106_27_4	Butanoic acid, 3-methylbutyl ester	323.15	845.78	841.391	0
106_27_4	Butanoic acid, 3-methylbutyl ester	328.15	842.31	837.285	0
106_27_4	Butanoic acid, 3-methylbutyl ester	338.15	835.45	829.058	0
106_27_4	Butanoic acid, 3-methylbutyl ester	343.15	832.76	824.939	0
106_27_4	Butanoic acid, 3-methylbutyl ester	288.15	867.72	869.994	0
106_27_4	Butanoic acid, 3-methylbutyl ester	348.15	813.19	820.816	0
106_30_9	Heptanoic acid, ethyl ester	289.14	873.5	872.782	0
106_30_9	Heptanoic acid, ethyl ester	273.15	887.9	885.721	0
106_30_9	Heptanoic acid, ethyl ester	322.43	843.247	845.645	0
106_30_9	Heptanoic acid, ethyl ester	338.62	828.734	832.368	0
106_30_9	Heptanoic acid, ethyl ester	351.92	816.891	821.43	0
106_30_9	Heptanoic acid, ethyl ester	371.12	799.206	805.596	0
106_30_9	Heptanoic acid, ethyl ester	384.53	786.996	794.509	0
106_30_9	Heptanoic acid, ethyl ester	403.93	768.63	778.436	0
106_30_9	Heptanoic acid, ethyl ester	429.44	744.35	757.248	0
106_30_9	Heptanoic acid, ethyl ester	365.22	801.319	810.466	0
106_30_9	Heptanoic acid, ethyl ester	315.03	850.5	851.698	0
106_30_9	Heptanoic acid, ethyl ester	293.94	869.5	868.885	0
106_30_9	Heptanoic acid, ethyl ester	298.44	865.5	865.226	0
106_30_9	Heptanoic acid, ethyl ester	335.02	833	835.324	0
106_30_9	Heptanoic acid, ethyl ester	360.12	811.1	814.673	0
106_30_9	Heptanoic acid, ethyl ester	303.2	860.8	861.35	0
106_30_9	Heptanoic acid, ethyl ester	323.09	841.6	845.105	0
106_30_9	Heptanoic acid, ethyl ester	343.02	823	828.753	0
106_30_9	Heptanoic acid, ethyl ester	352.85	815.1	820.664	0
106_31_0	Butanoic acid, anhydride	273.15	986.8	983.897	1
106_31_0	Butanoic acid, anhydride	293.14	967.319	965.263	1
106_31_0	Butanoic acid, anhydride	303.13	957.531	956.052	1
106_31_0	Butanoic acid, anhydride	313.13	947.712	946.891	1
106_31_0	Butanoic acid, anhydride	323.13	937.861	937.784	1
106_31_0	Butanoic acid, anhydride	333.12	927.978	928.734	1
106_31_0	Butanoic acid, anhydride	353.12	908.118	910.747	1
106_31_0	Butanoic acid, anhydride	373.12	888.132	892.91	1
106_31_0	Butanoic acid, anhydride	393.13	868.02	875.191	1
106_31_0	Butanoic acid, anhydride	413.13	847.781	857.59	1
106_32_1	Octanoic acid, ethyl ester	273.15	887.1	882.678	0
106_32_1	Octanoic acid, ethyl ester	294.44	866.17	866.147	0
106_32_1	Octanoic acid, ethyl ester	321.63	843.365	844.79	0
106_32_1	Octanoic acid, ethyl ester	351.52	817.778	821.067	0
106_32_1	Octanoic acid, ethyl ester	370.32	801.541	806.041	0
106_32_1	Octanoic acid, ethyl ester	383.83	789.516	795.201	0
106_32_1	Octanoic acid, ethyl ester	404.13	771.735	778.855	0
106_32_1	Octanoic acid, ethyl ester	428.44	749.11	759.203	0
106_32_1	Octanoic acid, ethyl ester	314.63	850.5	850.311	0
106_32_1	Octanoic acid, ethyl ester	289.44	872.5	870.046	0
106_32_1	Octanoic acid, ethyl ester	333.62	835	835.301	0
106_32_1	Octanoic acid, ethyl ester	360.22	812.6	814.122	0
106_32_1	Octanoic acid, ethyl ester	308.15	853.8	855.409	0
106_32_1	Octanoic acid, ethyl ester	323.15	840.7	843.589	0
106_32_1	Octanoic acid, ethyl ester	343.15	823.1	827.732	0
106_32_1	Octanoic acid, ethyl ester	353.15	814.3	819.767	0
106_32_1	Octanoic acid, ethyl ester	328.15	836.21	839.635	0
106_32_1	Octanoic acid, ethyl ester	278.15	879.5	878.813	0
106_32_1	Octanoic acid, ethyl ester	283.15	875.22	874.937	0
106_32_1	Octanoic acid, ethyl ester	298.2	862.23	863.209	0
106_32_1	Octanoic acid, ethyl ester	303.25	858.1	859.254	0
106_33_2	Dodecanoic acid, ethyl ester	285.14	867.9	865.458	0
106_33_2	Dodecanoic acid, ethyl ester	407.33	772.8	777.643	0
106_33_2	Dodecanoic acid, ethyl ester	374.12	802	802.178	0
106_33_2	Dodecanoic acid, ethyl ester	416.13	774	771.085	0
106_33_2	Dodecanoic acid, ethyl ester	359.12	813	813.13	0
106_33_2	Dodecanoic acid, ethyl ester	290.24	863.8	861.967	0
106_33_2	Dodecanoic acid, ethyl ester	315.03	846.2	844.717	0
106_33_2	Dodecanoic acid, ethyl ester	335.82	830.5	829.948	0
106_33_2	Dodecanoic acid, ethyl ester	368.12	803.5	806.57	0
106_33_2	Dodecanoic acid, ethyl ester	298.15	857.5	856.511	0
106_33_2	Dodecanoic acid, ethyl ester	303.15	853.8	853.038	0
106_33_2	Dodecanoic acid, ethyl ester	308.15	849.8	849.547	0
106_33_2	Dodecanoic acid, ethyl ester	323.15	838.4	838.978	0
106_33_2	Dodecanoic acid, ethyl ester	343.15	822.9	824.685	0
106_33_2	Dodecanoic acid, ethyl ester	348.15	818.6	821.08	0
106_33_2	Dodecanoic acid, ethyl ester	353.15	814.8	817.463	0
106_33_2	Dodecanoic acid, ethyl ester	318.15	842.9	842.517	0
106_33_2	Dodecanoic acid, ethyl ester	328.15	835.1	835.425	0
106_33_2	Dodecanoic acid, ethyl ester	338.15	827.2	828.278	0
106_33_2	Dodecanoic acid, ethyl ester	363.15	807.52	810.197	0
106_33_2	Dodecanoic acid, ethyl ester	393.15	783	788.163	0
106_35_4	3-Heptanone	295.14	816.7	811.824	0
106_35_4	3-Heptanone	288.14	822.2	817.82	0
106_35_4	3-Heptanone	307.98	807.7	800.801	0
106_35_4	3-Heptanone	323.28	794.1	787.632	0
106_35_4	3-Heptanone	313.63	800.8	795.942	0
106_35_4	3-Heptanone	335.02	782.9	777.505	0
106_35_4	3-Heptanone	359.62	761.1	756.228	0
106_35_4	3-Heptanone	298.15	814.12	809.242	0
106_36_5	Propanoic acid, propyl ester	273.15	902.2	898.282	0
106_36_5	Propanoic acid, propyl ester	381.47	783.9	797.71	0
106_36_5	Propanoic acid, propyl ester	394.83	768	785.413	0
106_36_5	Propanoic acid, propyl ester	338.42	835.3	837.464	0
106_36_5	Propanoic acid, propyl ester	360.12	817.7	817.398	0
106_37_6	Benzene, 1,4-dibromo-	367.92	1840	1833.86	0
106_37_6	Benzene, 1,4-dibromo-	388.13	1807	1804.55	0
106_37_6	Benzene, 1,4-dibromo-	403.23	1782	1783.61	0
106_37_6	Benzene, 1,4-dibromo-	417.63	1756	1764.32	0
106_37_6	Benzene, 1,4-dibromo-	441.64	1715	1733.43	0
106_37_6	Benzene, 1,4-dibromo-	453.14	1694	1719.14	0
106_37_6	Benzene, 1,4-dibromo-	467.65	1668	1701.53	0
106_37_6	Benzene, 1,4-dibromo-	482.16	1643	1684.35	0
106_37_6	Benzene, 1,4-dibromo-	383.12	1815.6	1811.67	0
106_37_6	Benzene, 1,4-dibromo-	393.12	1801.7	1797.55	0
106_38_7	Benzene, 1-bromo-4-methyl-	308.13	1387.67	1384.3	0
106_38_7	Benzene, 1-bromo-4-methyl-	313.13	1381.38	1377.91	0
106_38_7	Benzene, 1-bromo-4-methyl-	318.13	1375.23	1371.6	0
106_38_7	Benzene, 1-bromo-4-methyl-	323.13	1369.12	1365.35	0
106_38_7	Benzene, 1-bromo-4-methyl-	328.13	1362.88	1359.18	0
106_38_7	Benzene, 1-bromo-4-methyl-	333.12	1356.72	1353.08	0
106_38_7	Benzene, 1-bromo-4-methyl-	338.12	1350.37	1347.02	0
106_38_7	Benzene, 1-bromo-4-methyl-	343.12	1343.95	1341.03	0
106_38_7	Benzene, 1-bromo-4-methyl-	348.12	1337.56	1335.09	0
106_38_7	Benzene, 1-bromo-4-methyl-	353.12	1331.14	1329.21	0
106_38_7	Benzene, 1-bromo-4-methyl-	358.12	1324.88	1323.38	0
106_38_7	Benzene, 1-bromo-4-methyl-	363.12	1318.82	1317.59	0
106_38_7	Benzene, 1-bromo-4-methyl-	368.12	1312.95	1311.86	0
106_38_7	Benzene, 1-bromo-4-methyl-	373.12	1307.29	1306.17	0
106_38_7	Benzene, 1-bromo-4-methyl-	303.13	1393.73	1390.76	0
106_39_8	Benzene, 1-bromo-4-chloro-	344.12	1576	1566.56	0
106_39_8	Benzene, 1-bromo-4-chloro-	369.12	1540	1534.95	0
106_39_8	Benzene, 1-bromo-4-chloro-	390.13	1508	1509.71	0
106_39_8	Benzene, 1-bromo-4-chloro-	411.13	1476	1485.48	0
106_39_8	Benzene, 1-bromo-4-chloro-	428.14	1454	1466.49	0
106_39_8	Benzene, 1-bromo-4-chloro-	383.12	1511.9	1518.01	0
106_39_8	Benzene, 1-bromo-4-chloro-	393.12	1493.6	1506.2	0
106_42_3	p-Xylene	360.02	801.87	819.378	0
106_42_3	p-Xylene	380.03	783.39	801.447	0
106_42_3	p-Xylene	392.33	772.9	790.438	0
106_42_3	p-Xylene	410.23	754.19	774.43	0
106_42_3	p-Xylene	289.94	864.1	882.44	0
106_42_3	p-Xylene	383.13	781	798.671	0
106_42_3	p-Xylene	393.13	772	789.722	0
106_42_3	p-Xylene	403.13	763	780.778	0
106_42_3	p-Xylene	334.17	825.25	842.584	0
106_42_3	p-Xylene	319.99	837.55	855.339	0
106_42_3	p-Xylene	339.98	819.82	837.364	0
106_42_3	p-Xylene	399.97	764.14	783.603	0
106_42_3	p-Xylene	323.15	835.1	852.495	0
106_42_3	p-Xylene	328.15	830.07	847.997	0
106_42_3	p-Xylene	343.15	817.04	834.517	0
106_42_3	p-Xylene	348.15	812.51	830.027	0
106_42_3	p-Xylene	353.15	807.56	825.54	0
106_42_3	p-Xylene	363.15	798.73	816.571	0
106_42_3	p-Xylene	368.15	794.27	812.089	0
106_42_3	p-Xylene	373.15	789.29	807.609	0
106_42_3	p-Xylene	295.15	859.1	877.733	0
106_42_3	p-Xylene	300.15	854.927	873.22	0
106_42_3	p-Xylene	305.15	850.847	868.709	0
106_42_3	p-Xylene	310.15	846.84	864.202	0
106_42_3	p-Xylene	315.15	842.98	859.697	0
106_43_4	Benzene, 1-chloro-4-methyl-	367.72	995.5	1007.19	0
106_43_4	Benzene, 1-chloro-4-methyl-	385.25	977	991.306	0
106_43_4	Benzene, 1-chloro-4-methyl-	399.35	961.7	978.632	0
106_43_4	Benzene, 1-chloro-4-methyl-	409.17	951.7	969.853	0
106_43_4	Benzene, 1-chloro-4-methyl-	415.95	944.1	963.812	0
106_43_4	Benzene, 1-chloro-4-methyl-	423.89	935.7	956.759	0
106_43_4	Benzene, 1-chloro-4-methyl-	430.06	929	951.293	0
106_43_4	Benzene, 1-chloro-4-methyl-	291.14	1070.5	1078.79	0
106_43_4	Benzene, 1-chloro-4-methyl-	344.12	1018	1028.82	0
106_43_4	Benzene, 1-chloro-4-methyl-	363.32	999	1011.2	0
106_43_4	Benzene, 1-chloro-4-methyl-	389.23	973	987.72	0
106_43_4	Benzene, 1-chloro-4-methyl-	433.14	928	948.568	0
106_43_4	Benzene, 1-chloro-4-methyl-	331.12	1031	1040.88	0
106_43_4	Benzene, 1-chloro-4-methyl-	353.12	1009.49	1020.53	0
106_43_4	Benzene, 1-chloro-4-methyl-	373.12	988.924	1002.28	0
106_43_4	Benzene, 1-chloro-4-methyl-	314.63	1051.3	1056.35	0
106_43_4	Benzene, 1-chloro-4-methyl-	334.82	1031.7	1037.44	0
106_43_4	Benzene, 1-chloro-4-methyl-	359.82	1007.7	1014.39	0
106_43_4	Benzene, 1-chloro-4-methyl-	323.13	1040.1	1048.35	0
106_43_4	Benzene, 1-chloro-4-methyl-	294.14	1066	1075.89	0
106_43_4	Benzene, 1-chloro-4-methyl-	298.15	1065.14	1072.04	0
106_43_4	Benzene, 1-chloro-4-methyl-	283.15	1079.2	1086.54	0
106_43_4	Benzene, 1-chloro-4-methyl-	303.15	1059.5	1067.25	0
106_43_4	Benzene, 1-chloro-4-methyl-	308.15	1053.9	1062.49	0
106_43_4	Benzene, 1-chloro-4-methyl-	318.15	1045.68	1053.03	0
106_44_5	p-Cresol	338.72	997.8	1000.02	0
106_44_5	p-Cresol	352.42	987.2	987.165	0
106_44_5	p-Cresol	371.52	971.9	969.405	0
106_44_5	p-Cresol	384.83	960.1	957.131	0
106_44_5	p-Cresol	405.73	942.6	938.006	0
106_44_5	p-Cresol	415.33	934.5	929.275	0
106_44_5	p-Cresol	429.84	920.8	916.136	0
106_44_5	p-Cresol	314.13	1018	1023.41	0
106_44_5	p-Cresol	333.32	1004	1005.12	0
106_44_5	p-Cresol	356.12	984	983.71	0
106_44_5	p-Cresol	417.63	942	927.188	0
106_44_5	p-Cresol	439.14	927	907.749	0
106_44_5	p-Cresol	454.05	918	894.353	0
106_44_5	p-Cresol	467.65	910	882.184	0
106_44_5	p-Cresol	393.13	954	949.515	0
106_44_5	p-Cresol	433.14	921	913.157	0
106_44_5	p-Cresol	319.13	1014.01	1018.62	0
106_44_5	p-Cresol	373.12	969.8	967.925	0
106_44_5	p-Cresol	423.13	929.2	922.204	0
106_44_5	p-Cresol	323.15	1009.2	1014.78	0
106_44_5	p-Cresol	308.15	1021.98	1029.16	0
106_44_5	p-Cresol	328.15	1006.57	1010.03	0
106_44_5	p-Cresol	343.15	992.07	995.854	0
106_46_7	Benzene, 1,4-dichloro-	328.13	1249.42	1261.03	0
106_46_7	Benzene, 1,4-dichloro-	338.12	1237.71	1250.72	0
106_46_7	Benzene, 1,4-dichloro-	343.12	1231.9	1245.62	0
106_46_7	Benzene, 1,4-dichloro-	348.12	1226.25	1240.57	0
106_46_7	Benzene, 1,4-dichloro-	363.12	1210.99	1225.63	0
106_46_7	Benzene, 1,4-dichloro-	333.42	1242	1255.55	0
106_46_7	Benzene, 1,4-dichloro-	355.72	1218	1232.96	0
106_46_7	Benzene, 1,4-dichloro-	368.22	1205	1220.62	0
106_46_7	Benzene, 1,4-dichloro-	387.13	1185	1202.33	0
106_46_7	Benzene, 1,4-dichloro-	393.53	1168	1196.24	0
106_46_7	Benzene, 1,4-dichloro-	417.63	1153	1173.65	0
106_46_7	Benzene, 1,4-dichloro-	439.64	1130	1153.49	0
106_47_8	p-Chloroaniline	353.12	1160.99	1179.58	0
106_47_8	p-Chloroaniline	358.12	1156.45	1175.02	0
106_47_8	p-Chloroaniline	368.12	1147.77	1165.95	0
106_47_8	p-Chloroaniline	373.12	1143.46	1161.45	0
106_47_8	p-Chloroaniline	363.72	1151	1169.93	0
106_47_8	p-Chloroaniline	394.13	1124	1142.71	0
106_47_8	p-Chloroaniline	424.13	1097	1116.42	0
106_47_8	p-Chloroaniline	443.14	1080	1100	0
106_47_8	p-Chloroaniline	458.15	1067	1087.14	0
106_47_8	p-Chloroaniline	350.12	1169	1182.33	0
106_47_8	p-Chloroaniline	378.13	1140	1156.95	0
106_47_8	p-Chloroaniline	391.13	1127	1145.37	0
106_47_8	p-Chloroaniline	405.13	1112	1133.01	0
106_47_8	p-Chloroaniline	383.12	1133	1152.49	0
106_48_9	Phenol, 4-chloro-	317.13	1257.3	1268.51	0
106_48_9	Phenol, 4-chloro-	319.13	1255.4	1266.37	0
106_48_9	Phenol, 4-chloro-	323.13	1251.2	1262.11	0
106_49_0	p-Aminotoluene	416.13	883.11	890.672	0
106_49_0	p-Aminotoluene	454.15	848.54	858.027	0
106_49_0	p-Aminotoluene	465.75	838.12	848.088	0
106_49_0	p-Aminotoluene	468.75	838.48	845.519	0
106_49_0	p-Aminotoluene	323.13	952.9	971.193	0
106_49_0	p-Aminotoluene	328.13	956.8	966.831	0
106_49_0	p-Aminotoluene	338.12	949.1	958.129	0
106_49_0	p-Aminotoluene	343.12	945.5	953.78	0
106_49_0	p-Aminotoluene	319.13	971	974.687	0
106_49_0	p-Aminotoluene	333.12	953	962.482	0
106_49_0	p-Aminotoluene	348.12	943	949.435	0
106_49_0	p-Aminotoluene	358.12	931	940.758	0
106_49_0	p-Aminotoluene	368.12	928	932.094	0
106_49_0	p-Aminotoluene	378.13	914	923.436	0
106_49_0	p-Aminotoluene	388.13	905	914.799	0
106_49_0	p-Aminotoluene	393.13	900.5	910.484	0
106_49_0	p-Aminotoluene	398.13	890	906.173	0
106_49_0	p-Aminotoluene	363.12	927.6	936.424	0
106_49_0	p-Aminotoluene	408.73	889	897.041	0
106_49_0	p-Aminotoluene	426.44	871.7	881.808	0
106_49_0	p-Aminotoluene	440.64	858	869.614	0
106_49_0	p-Aminotoluene	451.14	847.7	860.607	0
106_62_7	1-Propanol, 2-(2-hydroxypropoxy)-	308.15	1010.46	1019.42	0
106_63_8	Isobutyl acrylate	293.1	880	892.349	0
106_65_0	Butanedioic acid, dimethyl ester	298.34	1115	1095.42	0
106_65_0	Butanedioic acid, dimethyl ester	313.53	1097	1079.51	0
106_65_0	Butanedioic acid, dimethyl ester	327.13	1082	1065.57	0
106_65_0	Butanedioic acid, dimethyl ester	349.02	1058	1043.63	0
106_65_0	Butanedioic acid, dimethyl ester	368.12	1032	1024.93	0
106_65_0	Butanedioic acid, dimethyl ester	389.13	1014	1004.75	0
106_65_0	Butanedioic acid, dimethyl ester	408.13	995	986.804	0
106_65_0	Butanedioic acid, dimethyl ester	423.13	980	972.815	0
106_65_0	Butanedioic acid, dimethyl ester	449.34	955	948.696	0
106_65_0	Butanedioic acid, dimethyl ester	336.32	1075.7	1056.29	0
106_65_0	Butanedioic acid, dimethyl ester	358.12	1054.8	1034.67	0
106_65_0	Butanedioic acid, dimethyl ester	293.2	1114.18	1100.89	0
106_68_3	3-Octanone	293.14	822	816.651	0
106_68_3	3-Octanone	314.33	805.4	799.317	0
106_68_3	3-Octanone	334.12	790.3	783.015	0
106_68_3	3-Octanone	359.22	769.3	762.208	0
106_68_3	3-Octanone	298.15	817.77	812.566	0
106_69_4	1,2,6-Hexanetriol	313.15	1090.9	1081.23	1
106_69_4	1,2,6-Hexanetriol	323.15	1084.9	1072.39	1
106_69_4	1,2,6-Hexanetriol	333.15	1078.8	1063.62	1
106_69_4	1,2,6-Hexanetriol	343.15	1072.6	1054.91	1
106_70_7	Hexanoic acid, methyl ester	273.15	903.8	902.395	1
106_70_7	Hexanoic acid, methyl ester	304.43	875.012	874.988	1
106_70_7	Hexanoic acid, methyl ester	314.43	865.626	866.242	1
106_70_7	Hexanoic acid, methyl ester	324.03	856.52	857.852	1
106_70_7	Hexanoic acid, methyl ester	351.52	830.088	833.854	1
106_70_7	Hexanoic acid, methyl ester	370.22	811.383	817.55	1
106_70_7	Hexanoic acid, methyl ester	383.63	797.846	805.866	1
106_70_7	Hexanoic acid, methyl ester	405.23	775.129	787.06	1
106_70_7	Hexanoic acid, methyl ester	310.93	867.3	869.303	1
106_70_7	Hexanoic acid, methyl ester	291.24	886.8	886.535	1
106_70_7	Hexanoic acid, methyl ester	334.72	845.6	848.515	1
106_70_7	Hexanoic acid, methyl ester	360.02	821.3	826.441	1
106_70_7	Hexanoic acid, methyl ester	298.15	879.453	880.485	1
106_70_7	Hexanoic acid, methyl ester	328.15	850.2	854.253	1
106_70_7	Hexanoic acid, methyl ester	338.15	841	845.521	1
106_70_7	Hexanoic acid, methyl ester	343.15	836.1	841.157	1
106_70_7	Hexanoic acid, methyl ester	353.15	826	832.432	1
106_70_7	Hexanoic acid, methyl ester	283.15	893.71	893.624	1
106_73_0	Heptanoic acid, methyl ester	273.15	898	897.771	0
106_73_0	Heptanoic acid, methyl ester	296.24	877.467	878.6	0
106_73_0	Heptanoic acid, methyl ester	321.23	855.401	857.789	0
106_73_0	Heptanoic acid, methyl ester	351.52	828.031	832.497	0
106_73_0	Heptanoic acid, methyl ester	370.12	810.762	816.937	0
106_73_0	Heptanoic acid, methyl ester	383.63	798.08	805.623	0
106_73_0	Heptanoic acid, methyl ester	405.63	776.817	787.181	0
106_73_0	Heptanoic acid, methyl ester	418.93	762.892	776.023	0
106_73_0	Heptanoic acid, methyl ester	289.94	884.4	883.837	0
106_73_0	Heptanoic acid, methyl ester	315.13	861.8	862.874	0
106_73_0	Heptanoic acid, methyl ester	334.92	843.7	846.366	0
106_73_0	Heptanoic acid, methyl ester	360.32	821.4	825.138	0
106_73_0	Heptanoic acid, methyl ester	298.15	875.416	877.011	0
106_73_0	Heptanoic acid, methyl ester	303.15	870.8	872.851	0
106_73_0	Heptanoic acid, methyl ester	308.15	866	868.689	0
106_73_0	Heptanoic acid, methyl ester	323.15	852.6	856.188	0
106_73_0	Heptanoic acid, methyl ester	328.15	848.1	852.017	0
106_73_0	Heptanoic acid, methyl ester	338.15	838.2	843.669	0
106_73_0	Heptanoic acid, methyl ester	343.15	833.9	839.493	0
106_73_0	Heptanoic acid, methyl ester	353.15	824.4	831.135	0
106_73_0	Heptanoic acid, methyl ester	283.15	888.97	889.476	0
106_88_7	Oxirane, ethyl-	298.15	824.63	856.048	1
106_88_7	Oxirane, ethyl-	288.15	835.44	864.902	1
106_88_7	Oxirane, ethyl-	313.15	807.89	842.838	1
106_97_8	Butane	145.09	726.085	729.955	0
106_97_8	Butane	155.09	716.663	720.428	0
106_97_8	Butane	165.09	706.985	710.763	0
106_97_8	Butane	174.94	697.69	701.132	0
106_97_8	Butane	186.38	686.88	689.832	0
106_97_8	Butane	194.5	679.09	681.747	0
106_97_8	Butane	205.44	668.61	670.782	0
106_97_8	Butane	213.86	660.42	662.295	0
106_97_8	Butane	224.98	649.46	651.031	0
106_97_8	Butane	255.37	618.94	619.983	0
106_97_8	Butane	263.79	610.09	611.326	0
106_97_8	Butane	135	734.916	739.398	0
106_97_8	Butane	140	730.233	734.742	0
106_97_8	Butane	150	720.898	725.296	0
106_97_8	Butane	160	711.571	715.698	0
106_97_8	Butane	170	702.242	705.975	0
106_97_8	Butane	180	692.884	696.148	0
106_97_8	Butane	190	683.479	686.233	0
106_97_8	Butane	200	674.009	676.244	0
106_97_8	Butane	210	664.456	666.191	0
106_97_8	Butane	220	654.796	656.083	0
106_97_8	Butane	230	645.011	645.927	0
106_97_8	Butane	240	635.071	635.728	0
106_97_8	Butane	250	624.967	625.493	0
106_98_9	1-Butene	230.18	665.6	678.501	0
106_98_9	1-Butene	234.98	660.6	673.451	0
106_98_9	1-Butene	240.18	654.7	667.974	0
106_98_9	1-Butene	245.57	648.9	662.287	0
106_98_9	1-Butene	255.26	638.5	652.046	0
106_98_9	1-Butene	259.76	633.4	647.282	0
106_98_9	1-Butene	264.96	627.7	641.771	0
106_98_9	1-Butene	213.2	685.4	696.298	0
106_98_9	1-Butene	195.1	704.8	715.138	0
106_98_9	1-Butene	223.39	673.6	685.63	0
106_98_9	1-Butene	250.01	644	657.597	0
106_99_0	1,3-Butadiene	213.2	712.2	719.161	1
106_99_0	1,3-Butadiene	223.19	701.4	709.436	1
106_99_0	1,3-Butadiene	233.18	690.4	699.644	1
106_99_0	1,3-Butadiene	243.17	679.2	689.795	1
106_99_0	1,3-Butadiene	255.39	666.08	677.677	1
106_99_0	1,3-Butadiene	164.26	763.8	765.445	1
106_99_0	1,3-Butadiene	173.19	754.5	757.216	1
106_99_0	1,3-Butadiene	183.09	744	747.962	1
106_99_0	1,3-Butadiene	193.09	733.5	738.495	1
106_99_0	1,3-Butadiene	203.09	722.9	728.925	1
10606_42_5	Propanoic acid, 3-methoxy-, ethyl ester	293.14	972.4	977.864	0
10606_42_5	Propanoic acid, 3-methoxy-, ethyl ester	313.13	951.6	958.908	0
10606_42_5	Propanoic acid, 3-methoxy-, ethyl ester	333.12	930.7	940.198	0
10606_42_5	Propanoic acid, 3-methoxy-, ethyl ester	358.12	904.4	917.082	0
106593_24_2	o-cresol, 4,6-diisopropyl-	298.14	947.7	950.326	0
106593_60_6	4-heptanol, 2,2,4,6-tetramethyl-	293.14	828	815.962	0
1067_08_9	Pentane, 3-ethyl-3-methyl-	295.64	725.5	715.428	0
1067_08_9	Pentane, 3-ethyl-3-methyl-	301.13	721.3	711.214	0
1067_08_9	Pentane, 3-ethyl-3-methyl-	305.13	717.2	708.135	0
1067_08_9	Pentane, 3-ethyl-3-methyl-	291.48	728.71	718.61	0
1067_08_9	Pentane, 3-ethyl-3-methyl-	313.55	711.27	701.628	0
1067_08_9	Pentane, 3-ethyl-3-methyl-	324.07	703.22	693.453	0
1067_20_5	Pentane, 3,3-diethyl-	288.14	756.49	743.978	0
1067_20_5	Pentane, 3,3-diethyl-	293.14	752.2	740.361	0
1067_20_5	Pentane, 3,3-diethyl-	298.14	748.66	736.732	0
1067_20_5	Pentane, 3,3-diethyl-	303.13	744.76	733.098	0
1067_20_5	Pentane, 3,3-diethyl-	313.13	737.56	725.782	0
1067_20_5	Pentane, 3,3-diethyl-	273.15	767.28	754.738	0
106738_62_9	cyclohexylamine, N,N-diethyl-2-methyl-	298.14	822.7	844.62	1
1068_87_7	Pentane, 3-ethyl-2,4-dimethyl-	293.14	737.91	740.779	0
1068_87_7	Pentane, 3-ethyl-2,4-dimethyl-	298.14	734.13	737.026	0
107_00_6	1-Butyne	241.88	711.9	691.442	0
107_00_6	1-Butyne	245.17	709.5	687.922	0
107_00_6	1-Butyne	250.17	702.8	682.573	0
107_00_6	1-Butyne	253.17	699.7	679.363	0
107_00_6	1-Butyne	258.16	694.9	674.024	0
107_00_6	1-Butyne	262.66	690	669.208	0
107_00_6	1-Butyne	268.15	683.6	663.333	0
107_00_6	1-Butyne	278.75	670.6	651.989	0
107_39_1	1-Pentene, 2,4,4-trimethyl-	303.13	706.54	699.54	0
107_39_1	1-Pentene, 2,4,4-trimethyl-	298.15	711.3	703.814	0
107_40_4	2-Pentene, 2,4,4-trimethyl-	273.15	734	721.046	0
107_40_4	2-Pentene, 2,4,4-trimethyl-	303.13	712.59	695.276	0
107_41_5	Hexylene glycol	290.14	925.4	950.234	1
107_41_5	Hexylene glycol	222.46	974.374	1011.38	1
107_41_5	Hexylene glycol	243.06	958.87	992.62	1
107_41_5	Hexylene glycol	262.05	944.639	975.455	1
107_41_5	Hexylene glycol	283.55	928.61	956.135	1
107_41_5	Hexylene glycol	293.15	921.8	947.541	1
107_41_5	Hexylene glycol	323.15	899.9	920.791	1
107_41_5	Hexylene glycol	343.15	885.3	903.03	1
107_41_5	Hexylene glycol	298.15	918.22	943.072	1
107_41_5	Hexylene glycol	278.15	932.344	960.977	1
107_41_5	Hexylene glycol	303.16	914.548	938.599	1
107_41_5	Hexylene glycol	308.16	910.981	934.139	1
107_41_5	Hexylene glycol	313.16	907.411	929.682	1
107_41_5	Hexylene glycol	318.15	903.84	925.239	1
107_41_5	Hexylene glycol	328.16	896.647	916.337	1
107_41_5	Hexylene glycol	333.16	893.033	911.895	1
107_41_5	Hexylene glycol	338.15	889.4	907.465	1
107_41_5	Hexylene glycol	348.16	882.068	898.589	1
107_41_5	Hexylene glycol	353.15	878.362	894.168	1
107_41_5	Hexylene glycol	358.15	874.626	889.741	1
107_46_0	Disiloxane, hexamethyl-	273.15	781.25	788.861	1
107_46_0	Disiloxane, hexamethyl-	278	780.2	784.895	1
107_46_0	Disiloxane, hexamethyl-	338	715.8	731.952	1
107_46_0	Disiloxane, hexamethyl-	358	692.8	713.084	1
107_46_0	Disiloxane, hexamethyl-	308.15	747.95	759.089	1
107_46_0	Disiloxane, hexamethyl-	323.15	731.57	745.622	1
107_46_0	Disiloxane, hexamethyl-	328.15	726.05	741.055	1
107_47_1	Di-tert-butyl sulfide	298.14	822.07	803.658	0
107_50_6	Cycloheptasiloxane, tetradecamethyl-	298.14	966.4	966.265	1
107_50_6	Cycloheptasiloxane, tetradecamethyl-	273.15	992.162	990.153	1
107_50_6	Cycloheptasiloxane, tetradecamethyl-	293.14	972.668	971.095	1
107_50_6	Cycloheptasiloxane, tetradecamethyl-	313.13	953.289	951.651	1
107_50_6	Cycloheptasiloxane, tetradecamethyl-	333.12	934.056	931.888	1
107_50_6	Cycloheptasiloxane, tetradecamethyl-	353.12	914.913	911.852	1
107_51_7	Trisiloxane, octamethyl-	273.15	840.548	836.052	1
107_51_7	Trisiloxane, octamethyl-	293.14	819.874	821.22	1
107_51_7	Trisiloxane, octamethyl-	353.12	758.035	771.668	1
107_51_7	Trisiloxane, octamethyl-	299.46	814.91	816.325	1
107_51_7	Trisiloxane, octamethyl-	305.06	809.186	811.913	1
107_51_7	Trisiloxane, octamethyl-	310.38	803.736	807.66	1
107_51_7	Trisiloxane, octamethyl-	315.34	798.626	803.645	1
107_51_7	Trisiloxane, octamethyl-	320.35	793.462	799.541	1
107_51_7	Trisiloxane, octamethyl-	325.35	788.289	795.401	1
107_51_7	Trisiloxane, octamethyl-	330.46	782.963	791.124	1
107_51_7	Trisiloxane, octamethyl-	334.97	778.259	787.314	1
107_51_7	Trisiloxane, octamethyl-	339.47	773.527	783.481	1
107_51_7	Trisiloxane, octamethyl-	345.97	766.612	777.889	1
107_51_7	Trisiloxane, octamethyl-	351.97	760.289	772.673	1
107_51_7	Trisiloxane, octamethyl-	366.98	744.081	759.416	1
107_51_7	Trisiloxane, octamethyl-	380.38	729.262	747.349	1
107_51_7	Trisiloxane, octamethyl-	392.22	715.82	736.525	1
107_51_7	Trisiloxane, octamethyl-	412.14	692.54	718.008	1
107_51_7	Trisiloxane, octamethyl-	213.17	901.006	872.191	1
107_51_7	Trisiloxane, octamethyl-	253.16	859.805	849.711	1
107_51_7	Trisiloxane, octamethyl-	278	835.8	832.552	1
107_51_7	Trisiloxane, octamethyl-	358	753	767.382	1
107_51_7	Trisiloxane, octamethyl-	398	708.9	731.19	1
107_51_7	Trisiloxane, octamethyl-	418	685.3	712.494	1
107_52_8	Hexasiloxane, tetradecamethyl-	298.14	889.9	866.274	0
107_52_8	Hexasiloxane, tetradecamethyl-	273.15	910.415	883.388	0
107_52_8	Hexasiloxane, tetradecamethyl-	313.13	871.612	855.221	0
107_52_8	Hexasiloxane, tetradecamethyl-	353.12	832.778	823.497	0
107_52_8	Hexasiloxane, tetradecamethyl-	293.36	889.846	869.683	0
107_52_8	Hexasiloxane, tetradecamethyl-	303.09	880.522	862.683	0
107_52_8	Hexasiloxane, tetradecamethyl-	308.08	875.718	859.003	0
107_52_8	Hexasiloxane, tetradecamethyl-	318.06	866.161	851.475	0
107_52_8	Hexasiloxane, tetradecamethyl-	323.09	861.334	847.6	0
107_52_8	Hexasiloxane, tetradecamethyl-	327.8	856.869	843.927	0
107_52_8	Hexasiloxane, tetradecamethyl-	333.87	851.057	839.131	0
107_52_8	Hexasiloxane, tetradecamethyl-	338.01	847.092	835.821	0
107_52_8	Hexasiloxane, tetradecamethyl-	343.12	842.197	831.695	0
107_52_8	Hexasiloxane, tetradecamethyl-	347.74	837.781	827.927	0
107_52_8	Hexasiloxane, tetradecamethyl-	363.03	823.093	815.223	0
107_52_8	Hexasiloxane, tetradecamethyl-	372.9	813.59	806.845	0
107_52_8	Hexasiloxane, tetradecamethyl-	382.14	804.596	798.887	0
107_52_8	Hexasiloxane, tetradecamethyl-	392.32	794.666	790.001	0
107_52_8	Hexasiloxane, tetradecamethyl-	402.56	784.578	780.947	0
107_52_8	Hexasiloxane, tetradecamethyl-	411.87	775.314	772.621	0
107_74_4	1,7-Octanediol, 3,7-dimethyl-	293.14	926	918.745	0
107_81_3	Pentane, 2-bromo-	273.15	1232.53	1229.7	0
107_81_3	Pentane, 2-bromo-	298.14	1200.52	1198.73	0
107_81_3	Pentane, 2-bromo-	293.14	1212.2	1204.81	0
107_81_3	Pentane, 2-bromo-	314.63	1182.8	1179	0
107_81_3	Pentane, 2-bromo-	334.22	1157.7	1156.16	0
107_81_3	Pentane, 2-bromo-	357.92	1126.3	1129.26	0
107_82_4	Butane, 1-bromo-3-methyl-	295.14	1205.8	1201.73	0
107_82_4	Butane, 1-bromo-3-methyl-	391.63	1088.1	1095.12	0
107_82_4	Butane, 1-bromo-3-methyl-	285.64	1217.2	1212.92	0
107_82_4	Butane, 1-bromo-3-methyl-	323.13	1170.2	1169.65	0
107_82_4	Butane, 1-bromo-3-methyl-	344.72	1139.5	1145.63	0
107_82_4	Butane, 1-bromo-3-methyl-	369.32	1105.4	1118.89	0
107_82_4	Butane, 1-bromo-3-methyl-	384.33	1084.5	1102.85	0
107_82_4	Butane, 1-bromo-3-methyl-	314.93	1179.1	1178.92	0
107_82_4	Butane, 1-bromo-3-methyl-	335.72	1152.9	1155.57	0
107_82_4	Butane, 1-bromo-3-methyl-	360.42	1123.9	1128.5	0
107_83_5	Pentane, 2-methyl-	290.14	658.3	658.189	0
107_83_5	Pentane, 2-methyl-	333.12	615.2	619.784	0
107_83_5	Pentane, 2-methyl-	119.66	804.274	788.699	0
107_83_5	Pentane, 2-methyl-	125.97	798.536	785.511	0
107_83_5	Pentane, 2-methyl-	130.12	794.853	783.261	0
107_83_5	Pentane, 2-methyl-	134.22	791.35	780.932	0
107_83_5	Pentane, 2-methyl-	140.4	786.152	777.241	0
107_83_5	Pentane, 2-methyl-	144.39	782.867	774.754	0
107_83_5	Pentane, 2-methyl-	150.14	777.99	771.043	0
107_83_5	Pentane, 2-methyl-	153.9	774.703	768.542	0
107_83_5	Pentane, 2-methyl-	283.15	662.17	664.346	0
107_83_5	Pentane, 2-methyl-	233.06	708.24	707.434	0
107_83_5	Pentane, 2-methyl-	243.06	699.11	699.006	0
107_83_5	Pentane, 2-methyl-	248.06	694.54	694.754	0
107_83_5	Pentane, 2-methyl-	253.05	689	690.489	0
107_83_5	Pentane, 2-methyl-	263.05	680.84	681.877	0
107_83_5	Pentane, 2-methyl-	303.15	643.89	646.656	0
107_83_5	Pentane, 2-methyl-	308.15	639.25	642.201	0
107_83_5	Pentane, 2-methyl-	323.15	624.76	628.765	0
107_84_6	Butane, 1-chloro-3-methyl-	298.24	862.5	861.117	0
[truncated: 21,867 more rows]

## Sheet: Atom properties
The properties of atoms used in this work
Atom	H	B	C	N	O	F	Si	P	S	Cl	Br	I
Pwei(g/mol)	1.0079	10.811	12.011	14.0067	15.9994	18.9984	28.0855	30.9738	32.066	35.4527	79.904	126.905
Pele	2.2	2.04	2.55	3.04	3.44	3.98	1.9	2.19	2.58	3.16	2.96	2.66
Pion(eV)	13.598	8.298	11.26	14.534	13.618	17.422	8.151	10.486	10.36	12.967	11.814	10.451
Prad(Å)	0.79	1.17	0.91	0.75	0.65	0.57	1.46	1.23	1.09	0.97	1.12	1.32
Pnoe	1	3	4	5	6	7	4	5	6	7	7	7
Pnoe/nes	1	1.5	2	2.5	3	3.5	1.3333	1.6667	2	2.3333	1.75	1.4
The above-mentioned data are available at: http://environmentalchemistry.com/yogi/periodic/

## Sheet: Eg.1
Sheet E.1 Pentafluorobenzene was taken as an example to calculate the value of Density (CAS:363-72-4)
H-contained
1.Property of atoms are shown as:
atom:	F	C	C	C	F	C	F	C	F	C	F	H
wei=[	18.9984	12.011	12.011	12.011	18.9984	12.011	18.9984	12.011	18.9984	12.011	18.9984	1.00794	]
ele=[	3.98	2.55	2.55	2.55	3.98	2.55	3.98	2.55	3.98	2.55	3.98	2.2	]
ion=[	17.422	11.26	11.26	11.26	17.422	11.26	17.422	11.26	17.422	11.26	17.422	13.598	]
rad=[	0.57	0.91	0.91	0.91	0.57	0.91	0.57	0.91	0.57	0.91	0.57	0.79	]
noe=[	7	4	4	4	7	4	7	4	7	4	7	1	]
nes=[	2	2	2	2	2	2	2	2	2	2	2	1	]
bra=[	1	3	3	3	1	3	1	3	1	3	1	1	]
2.Property matrices are shown as:
MPwei=	18.9984		MPele=	3.98		MPion=	17.422		MPrad=	0.57		MPnoe=	7		MPnoe/nes=	3.5		MPbra=	1
	12.011			2.55			11.26			0.91			4			2			3
	12.011			2.55			11.26			0.91			4			2			3
	12.011			2.55			11.26			0.91			4			2			3
	18.9984			3.98			17.422			0.57			7			3.5			1
	12.011			2.55			11.26			0.91			4			2			3
	18.9984			3.98			17.422			0.57			7			3.5			1
	12.011			2.55			11.26			0.91			4			2			3
	18.9984			3.98			17.422			0.57			7			3.5			1
	12.011			2.55			11.26			0.91			4			2			3
	18.9984			3.98			17.422			0.57			7			3.5			1
	1.00794			2.2			13.598			0.79			1			1			1
3. Step matrix are shown as:
MSF=	0	1	2	2	3	3	3	3	4	4	5	4
	1	0	1	1	2	2	2	2	3	3	4	3
	2	1	0	2	1	1	3	3	2	2	3	4
	2	1	2	0	3	3	1	1	4	2	3	2
	3	2	1	3	0	2	4	4	3	3	4	5
	3	2	1	3	2	0	4	2	1	1	2	3
	3	2	3	1	4	4	0	2	5	3	4	3
	3	2	3	1	4	2	2	0	3	1	2	1
	4	3	2	4	3	1	5	3	0	2	3	4
	4	3	2	2	3	1	3	1	2	0	1	2
	5	4	3	3	4	2	4	2	3	1	0	3
	4	3	4	2	5	3	3	1	4	2	3	0
MSA=	0	1	0	0	0	0	0	0	0	0	0	0
	1	0	1	1	0	0	0	0	0	0	0	0
	0	1	0	0	1	1	0	0	0	0	0	0
	0	1	0	0	0	0	1	1	0	0	0	0
	0	0	1	0	0	0	0	0	0	0	0	0
	0	0	1	0	0	0	0	0	1	1	0	0
	0	0	0	1	0	0	0	0	0	0	0	0
	0	0	0	1	0	0	0	0	0	1	0	1
	0	0	0	0	0	1	0	0	0	0	0	0
	0	0	0	0	0	1	0	1	0	0	1	0
	0	0	0	0	0	0	0	0	0	1	0	0
	0	0	0	0	0	0	0	1	0	0	0	0
MSAB=	0	1	2	2	0	0	0	0	0	0	0	0
	1	0	1	1	2	2	2	2	0	0	0	0
	2	1	0	2	1	1	0	0	2	2	0	0
	2	1	2	0	0	0	1	1	0	2	0	2
	0	2	1	0	0	2	0	0	0	0	0	0
	0	2	1	0	2	0	0	2	1	1	2	0
	0	2	0	1	0	0	0	2	0	0	0	0
	0	2	0	1	0	2	2	0	0	1	2	1
	0	0	2	0	0	1	0	0	0	2	0	0
	0	0	2	2	0	1	0	1	2	0	1	2
	0	0	0	0	0	2	0	2	0	1	0	0
	0	0	0	2	0	0	0	1	0	2	0	0
MSABC=	0	1	2	2	3	3	3	3	0	0	0	0
	1	0	1	1	2	2	2	2	3	3	0	3
	2	1	0	2	1	1	3	3	2	2	3	0
	2	1	2	0	3	3	1	1	0	2	3	2
	3	2	1	3	0	2	0	0	3	3	0	0
	3	2	1	3	2	0	0	2	1	1	2	3
	3	2	3	1	0	0	0	2	0	3	0	3
	3	2	3	1	0	2	2	0	3	1	2	1
	0	3	2	0	3	1	0	3	0	2	3	0
	0	3	2	2	3	1	3	1	2	0	1	2
	0	0	3	3	0	2	0	2	3	1	0	3
	0	3	0	2	0	3	3	1	0	2	3	0
MSbon=	0	1	0	0	0	0	0	0	0	0	0	0
	1	0	1.5	1.5	0	0	0	0	0	0	0	0
	0	1.5	0	0	1	1.5	0	0	0	0	0	0
	0	1.5	0	0	0	0	1	1.5	0	0	0	0
	0	0	1	0	0	0	0	0	0	0	0	0
	0	0	1.5	0	0	0	0	0	1	1.5	0	0
	0	0	0	1	0	0	0	0	0	0	0	0
	0	0	0	1.5	0	0	0	0	0	1.5	0	1
	0	0	0	0	0	1	0	0	0	0	0	0
	0	0	0	0	0	1.5	0	1.5	0	0	1	0
	0	0	0	0	0	0	0	0	0	1	0	0
	0	0	0	0	0	0	0	1	0	0	0	0
MSABC_aro=	0	1	2	2	0	3	0	3	0	0	0	0
	0	0	1	1	0	2	0	2	0	3	0	0
	0	1	0	2	0	1	0	3	0	2	0	0
	0	1	2	0	0	3	0	1	0	2	0	0
	0	2	1	3	0	2	0	0	0	3	0	0
	0	2	1	3	0	0	0	2	0	1	0	0
	0	2	3	1	0	0	0	2	0	3	0	0
	0	2	3	1	0	2	0	0	0	1	0	0
	0	3	2	0	0	1	0	3	0	2	0	0
	0	3	2	2	0	1	0	1	0	0	0	0
	0	0	3	3	0	2	0	2	0	1	0	0
	0	3	0	2	0	3	0	1	0	2	0	0
MSABC_cyc=	0	0	0	0	0	0	0	0	0	0	0	0
	0	0	0	0	0	0	0	0	0	0	0	0
	0	0	0	0	0	0	0	0	0	0	0	0
	0	0	0	0	0	0	0	0	0	0	0	0
	0	0	0	0	0	0	0	0	0	0	0	0
	0	0	0	0	0	0	0	0	0	0	0	0
	0	0	0	0	0	0	0	0	0	0	0	0
	0	0	0	0	0	0	0	0	0	0	0	0
	0	0	0	0	0	0	0	0	0	0	0	0
	0	0	0	0	0	0	0	0	0	0	0	0
	0	0	0	0	0	0	0	0	0	0	0	0
	0	0	0	0	0	0	0	0	0	0	0	0
MSbon_cyc=	0	0	0	0	0	0	0	0	0	0	0	0
	0	0	0	0	0	0	0	0	0	0	0	0
	0	0	0	0	0	0	0	0	0	0	0	0
	0	0	0	0	0	0	0	0	0	0	0	0
	0	0	0	0	0	0	0	0	0	0	0	0
	0	0	0	0	0	0	0	0	0	0	0	0
	0	0	0	0	0	0	0	0	0	0	0	0
	0	0	0	0	0	0	0	0	0	0	0	0
	0	0	0	0	0	0	0	0	0	0	0	0
	0	0	0	0	0	0	0	0	0	0	0	0
	0	0	0	0	0	0	0	0	0	0	0	0
	0	0	0	0	0	0	0	0	0	0	0	0
H-supressed
1.Property of atoms are shown as:
atom:	F	C	C	C	F	C	F	C	F	C	F
wei_H=[	18.9984	12.011	12.011	12.011	18.9984	12.011	18.9984	12.011	18.9984	12.011	18.9984	]
ele_H=[	3.98	2.55	2.55	2.55	3.98	2.55	3.98	2.55	3.98	2.55	3.98	]
ion_H=[	17.422	11.26	11.26	11.26	17.422	11.26	17.422	11.26	17.422	11.26	17.422	]
rad_H=[	0.57	0.91	0.91	0.91	0.57	0.91	0.57	0.91	0.57	0.91	0.57	]
noe_H=[	7	4	4	4	7	4	7	4	7	4	7	]
nes_H=[	2	2	2	2	2	2	2	2	2	2	2	]
bra_H=[	1	3	3	3	1	3	1	2	1	3	1	]
2.Property matrices are shown as:
MPwei_H=	18.9984		MPele_H=	3.98		MPion_H=	17.422		MPrad_H=	0.57		MPnoe_H=	7		MPnoe_H/nes_H=	3.5		MPbra_H=	1
	12.011			2.55			11.26			0.91			4			2			3
	12.011			2.55			11.26			0.91			4			2			3
	12.011			2.55			11.26			0.91			4			2			3
	18.9984			3.98			17.422			0.57			7			3.5			1
	12.011			2.55			11.26			0.91			4			2			3
	18.9984			3.98			17.422			0.57			7			3.5			1
	12.011			2.55			11.26			0.91			4			2			2
	18.9984			3.98			17.422			0.57			7			3.5			1
	12.011			2.55			11.26			0.91			4			2			3
	18.9984			3.98			17.422			0.57			7			3.5			1
3. Step matrix are shown as:
MSF_H=	0	1	2	2	3	3	3	3	4	4	5
	1	0	1	1	2	2	2	2	3	3	4
	2	1	0	2	1	1	3	3	2	2	3
	2	1	2	0	3	3	1	1	4	2	3
	3	2	1	3	0	2	4	4	3	3	4
	3	2	1	3	2	0	4	2	1	1	2
	3	2	3	1	4	4	0	2	5	3	4
	3	2	3	1	4	2	2	0	3	1	2
	4	3	2	4	3	1	5	3	0	2	3
	4	3	2	2	3	1	3	1	2	0	1
	5	4	3	3	4	2	4	2	3	1	0
MSA_H=	0	1	0	0	0	0	0	0	0	0	0
	1	0	1	1	0	0	0	0	0	0	0
	0	1	0	0	1	1	0	0	0	0	0
	0	1	0	0	0	0	1	1	0	0	0
	0	0	1	0	0	0	0	0	0	0	0
	0	0	1	0	0	0	0	0	1	1	0
	0	0	0	1	0	0	0	0	0	0	0
	0	0	0	1	0	0	0	0	0	1	0
	0	0	0	0	0	1	0	0	0	0	0
	0	0	0	0	0	1	0	1	0	0	1
	0	0	0	0	0	0	0	0	0	1	0
MSAB_H=	0	1	2	2	0	0	0	0	0	0	0
	1	0	1	1	2	2	2	2	0	0	0
	2	1	0	2	1	1	0	0	2	2	0
	2	1	2	0	0	0	1	1	0	2	0
	0	2	1	0	0	2	0	0	0	0	0
	0	2	1	0	2	0	0	2	1	1	2
	0	2	0	1	0	0	0	2	0	0	0
	0	2	0	1	0	2	2	0	0	1	2
	0	0	2	0	0	1	0	0	0	2	0
	0	0	2	2	0	1	0	1	2	0	1
	0	0	0	0	0	2	0	2	0	1	0
MSABC_H=	0	1	2	2	3	3	3	3	0	0	0
	1	0	1	1	2	2	2	2	3	3	0
	2	1	0	2	1	1	3	3	2	2	3
	2	1	2	0	3	3	1	1	0	2	3
	3	2	1	3	0	2	0	0	3	3	0
	3	2	1	3	2	0	0	2	1	1	2
	3	2	3	1	0	0	0	2	0	3	0
	3	2	3	1	0	2	2	0	3	1	2
	0	3	2	0	3	1	0	3	0	2	3
	0	3	2	2	3	1	3	1	2	0	1
	0	0	3	3	0	2	0	2	3	1	0
MSbon_H=	0	1	0	0	0	0	0	0	0	0	0
	1	0	1.5	1.5	0	0	0	0	0	0	0
	0	1.5	0	0	1	1.5	0	0	0	0	0
	0	1.5	0	0	0	0	1	1.5	0	0	0
	0	0	1	0	0	0	0	0	0	0	0
	0	0	1.5	0	0	0	0	0	1	1.5	0
	0	0	0	1	0	0	0	0	0	0	0
	0	0	0	1.5	0	0	0	0	0	1.5	0
	0	0	0	0	0	1	0	0	0	0	0
	0	0	0	0	0	1.5	0	1.5	0	0	1
	0	0	0	0	0	0	0	0	0	1	0
MSABC_aro_H=	0	1	2	2	0	3	0	3	0	0	0
	0	0	1	1	0	2	0	2	0	3	0
	0	1	0	2	0	1	0	3	0	2	0
	0	1	2	0	0	3	0	1	0	2	0
	0	2	1	3	0	2	0	0	0	3	0
	0	2	1	3	0	0	0	2	0	1	0
	0	2	3	1	0	0	0	2	0	3	0
	0	2	3	1	0	2	0	0	0	1	0
	0	3	2	0	0	1	0	3	0	2	0
	0	3	2	2	0	1	0	1	0	0	0
	0	0	3	3	0	2	0	2	0	1	0
MSABC_cyc_H=	0	0	0	0	0	0	0	0	0	0	0
	0	0	0	0	0	0	0	0	0	0	0
	0	0	0	0	0	0	0	0	0	0	0
	0	0	0	0	0	0	0	0	0	0	0
	0	0	0	0	0	0	0	0	0	0	0
	0	0	0	0	0	0	0	0	0	0	0
	0	0	0	0	0	0	0	0	0	0	0
	0	0	0	0	0	0	0	0	0	0	0
	0	0	0	0	0	0	0	0	0	0	0
	0	0	0	0	0	0	0	0	0	0	0
	0	0	0	0	0	0	0	0	0	0	0
MSbon_cyc_H=	0	0	0	0	0	0	0	0	0	0	0
	0	0	0	0	0	0	0	0	0	0	0
	0	0	0	0	0	0	0	0	0	0	0
	0	0	0	0	0	0	0	0	0	0	0
	0	0	0	0	0	0	0	0	0	0	0
	0	0	0	0	0	0	0	0	0	0	0
	0	0	0	0	0	0	0	0	0	0	0
	0	0	0	0	0	0	0	0	0	0	0
	0	0	0	0	0	0	0	0	0	0	0
	0	0	0	0	0	0	0	0	0	0	0
	0	0	0	0	0	0	0	0	0	0	0
4. Atomic distribution matrices (M) and norm indexes (I)are shown as:
M1=	0	10.149	0	0	0	0	0	0	0	0	0	0
	10.149	0	6.5025	6.5025	0	0	0	0	0	0	0	0
	0	6.5025	0	0	10.149	6.5025	0	0	0	0	0	0
	0	6.5025	0	0	0	0	10.149	6.5025	0	0	0	0
	0	0	10.149	0	0	0	0	0	0	0	0	0
	0	0	6.5025	0	0	0	0	0	10.149	6.5025	0	0
	0	0	0	10.149	0	0	0	0	0	0	0	0
	0	0	0	6.5025	0	0	0	0	0	6.5025	0	5.61
	0	0	0	0	0	10.149	0	0	0	0	0	0
	0	0	0	0	0	6.5025	0	6.5025	0	0	10.149	0
	0	0	0	0	0	0	0	0	0	10.149	0	0
	0	0	0	0	0	0	0	5.61	0	0	0	0
M2=	0	7	0	0	0	0	0	0	0	0	0	0
	7	0	4	4	0	0	0	0	0	0	0	0
	0	4	0	0	7	4	0	0	0	0	0	0
	0	4	0	0	0	0	7	4	0	0	0	0
	0	0	7	0	0	0	0	0	0	0	0	0
	0	0	4	0	0	0	0	0	7	4	0	0
	0	0	0	7	0	0	0	0	0	0	0	0
	0	0	0	4	0	0	0	0	0	4	0	2
	0	0	0	0	0	7	0	0	0	0	0	0
	0	0	0	0	0	4	0	4	0	0	7	0
	0	0	0	0	0	0	0	0	0	7	0	0
	0	0	0	0	0	0	0	2	0	0	0	0
M3=	0	196.172	0	0	0	0	0	0	0	0	0	0
	196.172	0	190.181	190.181	0	0	0	0	0	0	0	0
	0	190.181	0	0	196.172	190.181	0	0	0	0	0	0
	0	190.181	0	0	0	0	196.172	190.181	0	0	0	0
	0	0	196.172	0	0	0	0	0	0	0	0	0
	0	0	190.181	0	0	0	0	0	196.172	190.181	0	0
	0	0	0	196.172	0	0	0	0	0	0	0	0
	0	0	0	190.181	0	0	0	0	0	190.181	0	153.113
	0	0	0	0	0	196.172	0	0	0	0	0	0
	0	0	0	0	0	190.181	0	190.181	0	0	196.172	0
	0	0	0	0	0	0	0	0	0	196.172	0	0
	0	0	0	0	0	0	0	153.113	0	0	0	0
M4=	0	7	0	0	0	0	0	0	0	0	0
	7	0	6	6	0	0	0	0	0	0	0
	0	6	0	0	7	6	0	0	0	0	0
	0	6	0	0	0	0	7	6	0	0	0
	0	0	7	0	0	0	0	0	0	0	0
	0	0	6	0	0	0	0	0	7	6	0
	0	0	0	7	0	0	0	0	0	0	0
	0	0	0	6	0	0	0	0	0	6	0
	0	0	0	0	0	7	0	0	0	0	0
	0	0	0	0	0	6	0	6	0	0	7
	0	0	0	0	0	0	0	0	0	7	0
M5=	196.172	126.788	126.788	126.788	196.172	126.788	196.172	126.788	196.172	126.788	196.172	153.113
	695.87	449.747	449.747	449.747	695.87	449.747	695.87	449.747	695.87	449.747	695.87	543.131
	695.87	449.747	449.747	449.747	695.87	449.747	695.87	449.747	695.87	449.747	695.87	543.131
	695.87	449.747	449.747	449.747	695.87	449.747	695.87	449.747	695.87	449.747	695.87	543.131
	196.172	126.788	126.788	126.788	196.172	126.788	196.172	126.788	196.172	126.788	196.172	153.113
	695.87	449.747	449.747	449.747	695.87	449.747	695.87	449.747	695.87	449.747	695.87	543.131
	196.172	126.788	126.788	126.788	196.172	126.788	196.172	126.788	196.172	126.788	196.172	153.113
	629.248	406.689	406.689	406.689	629.248	406.689	629.248	406.689	629.248	406.689	629.248	491.133
	196.172	126.788	126.788	126.788	196.172	126.788	196.172	126.788	196.172	126.788	196.172	153.113
	695.87	449.747	449.747	449.747	695.87	449.747	695.87	449.747	695.87	449.747	695.87	543.131
	196.172	126.788	126.788	126.788	196.172	126.788	196.172	126.788	196.172	126.788	196.172	153.113
	196.172	126.788	126.788	126.788	196.172	126.788	196.172	126.788	196.172	126.788	196.172	153.113
M6=	6.9874	0	0	0	6.9874	0	6.9874	0	6.9874	0	6.9874	11.0031
	20.9622	6.9874	6.9874	6.9874	20.9622	6.9874	20.9622	6.9874	20.9622	6.9874	20.9622	50.9996
	20.9622	6.9874	6.9874	6.9874	20.9622	6.9874	20.9622	6.9874	20.9622	6.9874	20.9622	50.9996
	20.9622	6.9874	6.9874	6.9874	20.9622	6.9874	20.9622	6.9874	20.9622	6.9874	20.9622	50.9996
	6.9874	0	0	0	6.9874	0	6.9874	0	6.9874	0	6.9874	11.0031
	20.9622	6.9874	6.9874	6.9874	20.9622	6.9874	20.9622	6.9874	20.9622	6.9874	20.9622	50.9996
	6.9874	0	0	0	6.9874	0	6.9874	0	6.9874	0	6.9874	11.0031
	38.9527	11.0031	11.0031	11.0031	38.9527	11.0031	38.9527	11.0031	38.9527	11.0031	38.9527	33.0092
	6.9874	0	0	0	6.9874	0	6.9874	0	6.9874	0	6.9874	11.0031
	20.9622	6.9874	6.9874	6.9874	20.9622	6.9874	20.9622	6.9874	20.9622	6.9874	20.9622	50.9996
	6.9874	0	0	0	6.9874	0	6.9874	0	6.9874	0	6.9874	11.0031
	6.9874	0	0	0	6.9874	0	6.9874	0	6.9874	0	6.9874	11.0031
M7=	0	1.5	0	0	0	0	0	0	0	0	0	0
	1.5	0	0	0	0	0	0	0	0	0	0	0
	0	0	0	0	1.5	0	0	0	0	0	0	0
	0	0	0	0	0	0	1.5	0	0	0	0	0
	0	0	1.5	0	0	0	0	0	0	0	0	0
	0	0	0	0	0	0	0	0	1.5	0	0	0
	0	0	0	1.5	0	0	0	0	0	0	0	0
	0	0	0	0	0	0	0	0	0	0	0	1
	0	0	0	0	0	1.5	0	0	0	0	0	0
	0	0	0	0	0	0	0	0	0	0	1.5	0
	0	0	0	0	0	0	0	0	0	1.5	0	0
	0	0	0	0	0	0	0	1	0	0	0	0
M8=	0	7	0	0	0	0	0	0	0	0	0
	7	0	4	4	0	0	0	0	0	0	0
	0	4	0	0	7	4	0	0	0	0	0
	0	4	0	0	0	0	7	4	0	0	0
	0	0	7	0	0	0	0	0	0	0	0
	0	0	4	0	0	0	0	0	7	4	0
	0	0	0	7	0	0	0	0	0	0	0
	0	0	0	4	0	0	0	0	0	4	0
	0	0	0	0	0	7	0	0	0	0	0
	0	0	0	0	0	4	0	4	0	0	7
	0	0	0	0	0	0	0	0	0	7	0
M9=	0	3	6	6	0	0	0	0	0	0	0	0
	3	0	0	0	6	0	6	0	0	0	0	0
	6	0	0	0	3	0	0	0	6	0	0	0
	6	0	0	0	0	0	3	0	0	0	0	6
	0	6	3	0	0	6	0	0	0	0	0	0
	0	0	0	0	6	0	0	0	3	0	6	0
	0	6	0	3	0	0	0	6	0	0	0	0
	0	0	0	0	0	0	6	0	0	0	6	3
	0	0	6	0	0	3	0	0	0	6	0	0
	0	0	0	0	0	0	0	0	6	0	3	6
	0	0	0	0	0	6	0	6	0	3	0	0
	0	0	0	6	0	0	0	3	0	6	0	0
M10=	0	1.5	3	3	0	4.5	0	4.5	0	0	0	0
	1.5	0	0	0	3	0	3	0	4.5	0	0	3
	3	0	0	0	1.5	0	4.5	0	3	0	4.5	0
	3	0	0	0	4.5	0	1.5	0	0	0	4.5	2
	0	3	1.5	4.5	0	3	0	0	0	4.5	0	0
	4.5	0	0	0	3	0	0	0	1.5	0	3	3
	0	3	4.5	1.5	0	0	0	3	0	4.5	0	7.5
	4.5	0	0	0	0	0	3	0	4.5	0	3	1
	0	4.5	3	0	0	1.5	0	4.5	0	3	0	0
	0	0	0	0	4.5	0	4.5	0	3	0	1.5	2
	0	0	4.5	4.5	0	3	0	3	0	1.5	0	7.5
	0	3	0	2	0	3	7.5	1	0	2	7.5	0
M11=	0	3	0	0	0	0	0	0	0	0	0
	3	0	0	0	0	0	0	0	0	0	0
	0	0	0	0	3	0	0	0	0	0	0
	0	0	0	0	0	0	3	0	0	0	0
	0	0	3	0	0	0	0	0	0	0	0
	0	0	0	0	0	0	0	0	3	0	0
	0	0	0	3	0	0	0	0	0	0	0
	0	0	0	0	0	0	0	0	0	0	0
	0	0	0	0	0	3	0	0	0	0	0
	0	0	0	0	0	0	0	0	0	0	3
	0	0	0	0	0	0	0	0	0	3	0
M12=	0	28	56	56	147	84	147	84	196	112	245
	28	0	16	16	56	32	56	32	84	48	112
	56	16	0	32	28	16	84	48	56	32	84
	56	16	32	0	84	48	28	16	112	32	84
	147	56	28	84	0	56	196	112	147	84	196
	84	32	16	48	56	0	112	32	28	16	56
	147	56	84	28	196	112	0	56	245	84	196
	84	32	48	16	112	32	56	0	84	16	56
	196	84	56	112	147	28	245	84	0	56	147
	112	48	32	32	84	16	84	16	56	0	28
	245	112	84	84	196	56	196	56	147	28	0
M13=	0	28	56	56	147	84	147	84	0	0	0
	28	0	16	16	56	32	56	32	84	48	0
	56	16	0	32	28	16	84	48	56	32	84
	56	16	32	0	84	48	28	16	0	32	84
	147	56	28	84	0	56	0	0	147	84	0
	84	32	16	48	56	0	0	32	28	16	56
	147	56	84	28	0	0	0	56	0	84	0
	84	32	48	16	0	32	56	0	84	16	56
	0	84	56	0	147	28	0	84	0	56	147
	0	48	32	32	84	16	84	16	56	0	28
	0	0	84	84	0	56	0	56	147	28	0
M14=	0.5187	0.8281	0.8281	0.8281	0.5187	0.8281	0.5187	0.8281	0.5187	0.8281	0.5187
	1.881	3.003	3.003	3.003	1.881	3.003	1.881	3.003	1.881	3.003	1.881
	1.881	3.003	3.003	3.003	1.881	3.003	1.881	3.003	1.881	3.003	1.881
	1.881	3.003	3.003	3.003	1.881	3.003	1.881	3.003	1.881	3.003	1.881
	0.5187	0.8281	0.8281	0.8281	0.5187	0.8281	0.5187	0.8281	0.5187	0.8281	0.5187
	1.881	3.003	3.003	3.003	1.881	3.003	1.881	3.003	1.881	3.003	1.881
	0.5187	0.8281	0.8281	0.8281	0.5187	0.8281	0.5187	0.8281	0.5187	0.8281	0.5187
	1.5561	2.4843	2.4843	2.4843	1.5561	2.4843	1.5561	2.4843	1.5561	2.4843	1.5561
	0.5187	0.8281	0.8281	0.8281	0.5187	0.8281	0.5187	0.8281	0.5187	0.8281	0.5187
	1.881	3.003	3.003	3.003	1.881	3.003	1.881	3.003	1.881	3.003	1.881
	0.5187	0.8281	0.8281	0.8281	0.5187	0.8281	0.5187	0.8281	0.5187	0.8281	0.5187
M15=	0	196.172	392.343	392.343	910.578	588.515	910.578	588.515	0	0	0	0
	196.172	0	126.788	126.788	392.343	253.575	392.343	253.575	588.515	380.363	0	459.34
	392.343	126.788	0	253.575	196.172	126.788	588.515	380.363	392.343	253.575	588.515	0
	392.343	126.788	253.575	0	588.515	380.363	196.172	126.788	0	253.575	588.515	306.227
	910.578	392.343	196.172	588.515	0	392.343	0	0	910.578	588.515	0	0
	588.515	253.575	126.788	380.363	392.343	0	0	253.575	196.172	126.788	392.343	459.34
	910.578	392.343	588.515	196.172	0	0	0	392.343	0	588.515	0	710.713
	588.515	253.575	380.363	126.788	0	253.575	392.343	0	588.515	126.788	392.343	153.113
	0	588.515	392.343	0	910.578	196.172	0	588.515	0	392.343	910.578	0
	0	380.363	253.575	253.575	588.515	126.788	588.515	126.788	392.343	0	196.172	306.227
	0	0	588.515	588.515	0	392.343	0	392.343	910.578	196.172	0	710.713
	0	459.34	0	306.227	0	459.34	710.713	153.113	0	306.227	710.713	0
M16=	0	0.5187	0	0	0	0	0	0	0	0	0	0
	0.5187	0	1.24215	1.24215	0	0	0	0	0	0	0	0
	0	1.24215	0	0	0.5187	1.24215	0	0	0	0	0	0
	0	1.24215	0	0	0	0	0.5187	1.24215	0	0	0	0
	0	0	0.5187	0	0	0	0	0	0	0	0	0
	0	0	1.24215	0	0	0	0	0	0.5187	1.24215	0	0
	0	0	0	0.5187	0	0	0	0	0	0	0	0
	0	0	0	1.24215	0	0	0	0	0	1.24215	0	0.7189
	0	0	0	0	0	0.5187	0	0	0	0	0	0
	0	0	0	0	0	1.24215	0	1.24215	0	0	0.5187	0
	0	0	0	0	0	0	0	0	0	0.5187	0	0
	0	0	0	0	0	0	0	0.7189	0	0	0	0
M17=	0	7	14	14	0	0	0	0	0	0	0
	7	0	4	4	14	8	14	8	0	0	0
	14	4	0	8	7	4	0	0	14	8	0
	14	4	8	0	0	0	7	4	0	8	0
	0	14	7	0	0	14	0	0	0	0	0
	0	8	4	0	14	0	0	8	7	4	14
	0	14	0	7	0	0	0	14	0	0	0
	0	8	0	4	0	8	14	0	0	4	14
	0	0	14	0	0	7	0	0	0	14	0
	0	0	8	8	0	4	0	4	14	0	7
	0	0	0	0	0	14	0	14	0	7	0
M18=	0	0	0	0	0	0	0	0	0	0	0
	0	0	0	0	0	0	0	0	0	0	0
	0	0	0	0	0	0	0	0	0	0	0
	0	0	0	0	0	0	0	0	0	0	0
	0	0	0	0	0	0	0	0	0	0	0
	0	0	0	0	0	0	0	0	0	0	0
	0	0	0	0	0	0	0	0	0	0	0
	0	0	0	0	0	0	0	0	0	0	0
	0	0	0	0	0	0	0	0	0	0	0
	0	0	0	0	0	0	0	0	0	0	0
	0	0	0	0	0	0	0	0	0	0	0
M19=	0	2	4	4	0	0	0	0	0	0	0	0
	2	0	0	0	4	0	4	0	0	0	0	0
	4	0	0	0	2	0	0	0	4	0	0	0
	4	0	0	0	0	0	2	0	0	0	0	4
	0	4	2	0	0	4	0	0	0	0	0	0
	0	0	0	0	4	0	0	0	2	0	4	0
	0	4	0	2	0	0	0	4	0	0	0	0
	0	0	0	0	0	0	4	0	0	0	4	2
	0	0	4	0	0	2	0	0	0	4	0	0
	0	0	0	0	0	0	0	0	4	0	2	4
	0	0	0	0	0	4	0	4	0	2	0	0
	0	0	0	4	0	0	0	2	0	4	0	0
M20	2.5935	4.1405	4.1405	4.1405	2.5935	4.1405	2.5935	4.1405	2.5935	4.1405	2.5935
	4.7367	7.5621	7.5621	7.5621	4.7367	7.5621	4.7367	7.5621	4.7367	7.5621	4.7367
	4.7367	7.5621	7.5621	7.5621	4.7367	7.5621	4.7367	7.5621	4.7367	7.5621	4.7367
	4.0869	6.5247	6.5247	6.5247	4.0869	6.5247	4.0869	6.5247	4.0869	6.5247	4.0869
	2.5935	4.1405	4.1405	4.1405	2.5935	4.1405	2.5935	4.1405	2.5935	4.1405	2.5935
	4.7367	7.5621	7.5621	7.5621	4.7367	7.5621	4.7367	7.5621	4.7367	7.5621	4.7367
	2.5935	4.1405	4.1405	4.1405	2.5935	4.1405	2.5935	4.1405	2.5935	4.1405	2.5935
	4.4118	7.0434	7.0434	7.0434	4.4118	7.0434	4.4118	7.0434	4.4118	7.0434	4.4118
	2.5935	4.1405	4.1405	4.1405	2.5935	4.1405	2.5935	4.1405	2.5935	4.1405	2.5935
	4.0869	6.5247	6.5247	6.5247	4.0869	6.5247	4.0869	6.5247	4.0869	6.5247	4.0869
	2.5935	4.1405	4.1405	4.1405	2.5935	4.1405	2.5935	4.1405	2.5935	4.1405	2.5935
M21	0	0.5187	1.0374	1.0374	0.9747	1.5561	0.9747	1.5561	0	0	0
	0.5187	0	0.8281	0.8281	1.0374	1.6562	1.0374	1.6562	1.5561	2.4843	0
	1.0374	0.8281	0	1.6562	0.5187	0.8281	1.5561	2.4843	1.0374	1.6562	1.5561
	1.0374	0.8281	1.6562	0	1.5561	2.4843	0.5187	0.8281	0	1.6562	1.5561
	0.9747	1.0374	0.5187	1.5561	0	1.0374	0	0	0.9747	1.5561	0
	1.5561	1.6562	0.8281	2.4843	1.0374	0	0	1.6562	0.5187	0.8281	1.0374
	0.9747	1.0374	1.5561	0.5187	0	0	0	1.0374	0	1.5561	0
	1.5561	1.6562	2.4843	0.8281	0	1.6562	1.0374	0	1.5561	0.8281	1.0374
	0	1.5561	1.0374	0	0.9747	0.5187	0	1.5561	0	1.0374	0.9747
	0	2.4843	1.6562	1.6562	1.5561	0.8281	1.5561	0.8281	1.0374	0	0.5187
	0	0	1.5561	1.5561	0	1.0374	0	1.0374	0.9747	0.5187	0
M22	0.5187	0.8281	0.8281	0.8281	0.5187	0.8281	0.5187	0.8281	0.5187	0.8281	0.5187
	1.881	3.003	3.003	3.003	1.881	3.003	1.881	3.003	1.881	3.003	1.881
	1.881	3.003	3.003	3.003	1.881	3.003	1.881	3.003	1.881	3.003	1.881
	1.881	3.003	3.003	3.003	1.881	3.003	1.881	3.003	1.881	3.003	1.881
	0.5187	0.8281	0.8281	0.8281	0.5187	0.8281	0.5187	0.8281	0.5187	0.8281	0.5187
	1.881	3.003	3.003	3.003	1.881	3.003	1.881	3.003	1.881	3.003	1.881
	0.5187	0.8281	0.8281	0.8281	0.5187	0.8281	0.5187	0.8281	0.5187	0.8281	0.5187
	1.5561	2.4843	2.4843	2.4843	1.5561	2.4843	1.5561	2.4843	1.5561	2.4843	1.5561
	0.5187	0.8281	0.8281	0.8281	0.5187	0.8281	0.5187	0.8281	0.5187	0.8281	0.5187
	1.881	3.003	3.003	3.003	1.881	3.003	1.881	3.003	1.881	3.003	1.881
	0.5187	0.8281	0.8281	0.8281	0.5187	0.8281	0.5187	0.8281	0.5187	0.8281	0.5187
M23	0	0	0	0	0	0	0	0	0	0	0
	0	0	0	0	0	0	0	0	0	0	0
	0	0	0	0	0	0	0	0	0	0	0
	0	0	0	0	0	0	0	0	0	0	0
	0	0	0	0	0	0	0	0	0	0	0
	0	0	0	0	0	0	0	0	0	0	0
	0	0	0	0	0	0	0	0	0	0	0
	0	0	0	0	0	0	0	0	0	0	0
	0	0	0	0	0	0	0	0	0	0	0
	0	0	0	0	0	0	0	0	0	0	0
	0	0	0	0	0	0	0	0	0	0	0
M24	0	6.162	12.324	12.324	0	18.486	0	18.486	0	24.648	0	15.296
	6.162	0	0	0	12.324	0	12.324	0	18.486	0	24.648	7.014
	12.324	0	0	0	6.162	0	18.486	0	12.324	0	18.486	9.352
	12.324	0	0	0	18.486	0	6.162	0	24.648	0	18.486	4.676
	0	12.324	6.162	18.486	0	12.324	0	24.648	0	18.486	0	19.12
	18.486	0	0	0	12.324	0	24.648	0	6.162	0	12.324	7.014
	0	12.324	18.486	6.162	0	24.648	0	12.324	0	18.486	0	11.472
	18.486	0	0	0	24.648	0	12.324	0	18.486	0	12.324	2.338
	0	18.486	12.324	24.648	0	6.162	0	18.486	0	12.324	0	15.296
	24.648	0	0	0	18.486	0	18.486	0	12.324	0	6.162	4.676
	0	24.648	18.486	18.486	0	12.324	0	12.324	0	6.162	0	11.472
	15.296	7.014	9.352	4.676	19.12	7.014	11.472	2.338	15.296	4.676	11.472	0
M25	0	3	0	0	0	0	0	0	0	0	0	0
	3	0	0	0	0	0	0	0	0	0	0	0
	0	0	0	0	3	0	0	0	0	0	0	0
	0	0	0	0	0	0	3	0	0	0	0	0
	0	0	3	0	0	0	0	0	0	0	0	0
	0	0	0	0	0	0	0	0	3	0	0	0
	0	0	0	3	0	0	0	0	0	0	0	0
	0	0	0	0	0	0	0	0	0	0	0	3
	0	0	0	0	0	3	0	0	0	0	0	0
	0	0	0	0	0	0	0	0	0	0	3	0
	0	0	0	0	0	0	0	0	0	3	0	0
	0	0	0	0	0	0	0	3	0	0	0	0
M26	0	2	0	0	0	0	0	0	0	0	0
	2	0	0	0	0	0	0	0	0	0	0
	0	0	0	0	2	0	0	0	0	0	0
	0	0	0	0	0	0	2	1	0	0	0
	0	0	2	0	0	0	0	0	0	0	0
	0	0	0	0	0	0	0	0	2	0	0
	0	0	0	2	0	0	0	0	0	0	0
	0	0	0	1	0	0	0	0	0	1	0
	0	0	0	0	0	2	0	0	0	0	0
	0	0	0	0	0	0	0	1	0	0	2
	0	0	0	0	0	0	0	0	0	2	0
M27	0	196.172	0	0	0	0	0	0	0	0	0
	196.172	0	190.181	190.181	0	0	0	0	0	0	0
	0	190.181	0	0	196.172	190.181	0	0	0	0	0
	0	190.181	0	0	0	0	196.172	190.181	0	0	0
	0	0	196.172	0	0	0	0	0	0	0	0
	0	0	190.181	0	0	0	0	0	196.172	190.181	0
	0	0	0	196.172	0	0	0	0	0	0	0
	0	0	0	190.181	0	0	0	0	0	190.181	0
	0	0	0	0	0	196.172	0	0	0	0	0
	0	0	0	0	0	190.181	0	190.181	0	0	196.172
	0	0	0	0	0	0	0	0	0	196.172	0
M28	0	3	0	0	0	0	0	0	0	0	0
	3	0	0	0	0	0	0	0	0	0	0
	0	0	0	0	3	0	0	0	0	0	0
	0	0	0	0	0	0	3	0	0	0	0
	0	0	3	0	0	0	0	0	0	0	0
	0	0	0	0	0	0	0	0	3	0	0
	0	0	0	3	0	0	0	0	0	0	0
	0	0	0	0	0	0	0	0	0	0	0
	0	0	0	0	0	3	0	0	0	0	0
	0	0	0	0	0	0	0	0	0	0	3
	0	0	0	0	0	0	0	0	0	3	0
M29	0	2	4	4	0	6	0	6	0	8	0	0
	2	0	0	0	4	0	4	0	6	0	8	6
	4	0	0	0	2	0	6	0	4	0	6	8
	4	0	0	0	6	0	2	0	8	0	6	4
	0	4	2	6	0	4	0	8	0	6	0	0
	6	0	0	0	4	0	8	0	2	0	4	6
	0	4	6	2	0	8	0	4	0	6	0	0
	6	0	0	0	8	0	4	0	6	0	4	2
	0	6	4	8	0	2	0	6	0	4	0	0
	8	0	0	0	6	0	6	0	4	0	2	4
	0	8	6	6	0	4	0	4	0	2	0	0
	0	6	8	4	0	6	0	2	0	4	0	0
M30	0	6.162	12.324	12.324	0	18.486	0	18.486	0	24.648	0
	6.162	0	0	0	12.324	0	12.324	0	18.486	0	24.648
	12.324	0	0	0	6.162	0	18.486	0	12.324	0	18.486
	12.324	0	0	0	18.486	0	6.162	0	24.648	0	18.486
	0	12.324	6.162	18.486	0	12.324	0	24.648	0	18.486	0
	18.486	0	0	0	12.324	0	24.648	0	6.162	0	12.324
	0	12.324	18.486	6.162	0	24.648	0	12.324	0	18.486	0
	18.486	0	0	0	24.648	0	12.324	0	18.486	0	12.324
	0	18.486	12.324	24.648	0	6.162	0	18.486	0	12.324	0
	24.648	0	0	0	18.486	0	18.486	0	12.324	0	6.162
	0	24.648	18.486	18.486	0	12.324	0	12.324	0	6.162	0
M31	0	0.5187	1.0374	1.0374	0.9747	1.5561	0.9747	1.5561	1.2996	2.0748	1.6245
	0.5187	0	0.8281	0.8281	1.0374	1.6562	1.0374	1.6562	1.5561	2.4843	2.0748
	1.0374	0.8281	0	1.6562	0.5187	0.8281	1.5561	2.4843	1.0374	1.6562	1.5561
	1.0374	0.8281	1.6562	0	1.5561	2.4843	0.5187	0.8281	2.0748	1.6562	1.5561
	0.9747	1.0374	0.5187	1.5561	0	1.0374	1.2996	2.0748	0.9747	1.5561	1.2996
	1.5561	1.6562	0.8281	2.4843	1.0374	0	2.0748	1.6562	0.5187	0.8281	1.0374
	0.9747	1.0374	1.5561	0.5187	1.2996	2.0748	0	1.0374	1.6245	1.5561	1.2996
	1.5561	1.6562	2.4843	0.8281	2.0748	1.6562	1.0374	0	1.5561	0.8281	1.0374
	1.2996	1.5561	1.0374	2.0748	0.9747	0.5187	1.6245	1.5561	0	1.0374	0.9747
	2.0748	2.4843	1.6562	1.6562	1.5561	0.8281	1.5561	0.8281	1.0374	0	0.5187
	1.6245	2.0748	1.5561	1.5561	1.2996	1.0374	1.2996	1.0374	0.9747	0.5187	0
k	1	2	3	4	5	6	7	8	9	10	11	12	13	14	15	16	17	18	19
I1~I19	15.895	10.1667	379.177	30.3645	386.746	11.8038	0.449977	0.975207	436.648	253.266	132.868	62.2955	27.8162	1.0736	1.1983e+06	583.558	1986.16	0	2010.06
b1~b19	275.862	-255.851	2.26523	-5.2415	-0.993839	9.34287	227.271	-105.477	0.162387	0.614391	-0.822431	1.71906	1.68689	-139.837	5.55423e-05	-0.289797	-0.0495362	0.194503	-0.014055
k	20	21	22	23	24	25	26	27	28	29	30	31
I20~I31	3979.86	2002.24	1486.5	0	0.0289612	0.488191	0.102494	18.1238	0.0214531	0.00601343	0.0168431	0.00268942
b20~b31	-0.0242517	0.032594	0.0589633	-0.0129026	1672.37	651.558	-505.509	14.5297	585.945	1229.77	-7897.27	-85454.1
b0	-884.157
nh	0.0909091
ws	14.0055
sm	0.6742
ss	0.0597614
sqrt(nh/sm)	0.6742
T	298.14
Cal. Density (K)	1508.09

## Sheet: Eg.2
Sheet E.2 o-Xylene was taken as an example to calculate the value of Density (CAS:95-47-6)
H-contained
1.Property of atoms are shown as:
atom:	C	C	C	C	C	C	C	C	H	H	H	H	H	H	H	H	H	H
wei=[	12.011	12.011	12.011	12.011	12.011	12.011	12.011	12.011	1.00794	1.00794	1.00794	1.00794	1.00794	1.00794	1.00794	1.00794	1.00794	1.00794	]
ele=[	2.55	2.55	2.55	2.55	2.55	2.55	2.55	2.55	2.2	2.2	2.2	2.2	2.2	2.2	2.2	2.2	2.2	2.2	]
ion=[	11.26	11.26	11.26	11.26	11.26	11.26	11.26	11.26	13.598	13.598	13.598	13.598	13.598	13.598	13.598	13.598	13.598	13.598	]
rad=[	0.91	0.91	0.91	0.91	0.91	0.91	0.91	0.91	0.79	0.79	0.79	0.79	0.79	0.79	0.79	0.79	0.79	0.79	]
noe=[	4	4	4	4	4	4	4	4	1	1	1	1	1	1	1	1	1	1	]
nes=[	2	2	2	2	2	2	2	2	1	1	1	1	1	1	1	1	1	1	]
bra=[	4	3	3	3	4	3	3	3	1	1	1	1	1	1	1	1	1	1	]
2.Property matrices are shown as:
MPwei=	12.011		MPele=	2.55		MPion=	11.26		MPrad=	0.91		MPnoe=	4		MPnoe_nes=	2		MPbra=	4
	12.011			2.55			11.26			0.91			4			2			3
	12.011			2.55			11.26			0.91			4			2			3
	12.011			2.55			11.26			0.91			4			2			3
	12.011			2.55			11.26			0.91			4			2			4
	12.011			2.55			11.26			0.91			4			2			3
	12.011			2.55			11.26			0.91			4			2			3
	12.011			2.55			11.26			0.91			4			2			3
	1.00794			2.2			13.598			0.79			1			1			1
	1.00794			2.2			13.598			0.79			1			1			1
	1.00794			2.2			13.598			0.79			1			1			1
	1.00794			2.2			13.598			0.79			1			1			1
	1.00794			2.2			13.598			0.79			1			1			1
	1.00794			2.2			13.598			0.79			1			1			1
	1.00794			2.2			13.598			0.79			1			1			1
	1.00794			2.2			13.598			0.79			1			1			1
	1.00794			2.2			13.598			0.79			1			1			1
	1.00794			2.2			13.598			0.79			1			1			1
3. Step matrix are shown as:
MSF=	0	1	2	2	3	3	3	4	1	1	1	3	4	4	4	4	4	5
	1	0	1	1	2	2	2	3	2	2	2	2	3	3	3	3	3	4
	2	1	0	2	1	1	3	2	3	3	3	3	2	2	2	2	4	3
	2	1	2	0	3	3	1	2	3	3	3	1	4	4	4	4	2	3
	3	2	1	3	0	2	4	3	4	4	4	4	1	1	1	3	5	4
	3	2	1	3	2	0	2	1	4	4	4	4	3	3	3	1	3	2
	3	2	3	1	4	2	0	1	4	4	4	2	5	5	5	3	1	2
	4	3	2	2	3	1	1	0	5	5	5	3	4	4	4	2	2	1
	1	2	3	3	4	4	4	5	0	2	2	4	5	5	5	5	5	6
	1	2	3	3	4	4	4	5	2	0	2	4	5	5	5	5	5	6
	1	2	3	3	4	4	4	5	2	2	0	4	5	5	5	5	5	6
	3	2	3	1	4	4	2	3	4	4	4	0	5	5	5	5	3	4
	4	3	2	4	1	3	5	4	5	5	5	5	0	2	2	4	6	5
	4	3	2	4	1	3	5	4	5	5	5	5	2	0	2	4	6	5
	4	3	2	4	1	3	5	4	5	5	5	5	2	2	0	4	6	5
	4	3	2	4	3	1	3	2	5	5	5	5	4	4	4	0	4	3
	4	3	4	2	5	3	1	2	5	5	5	3	6	6	6	4	0	3
	5	4	3	3	4	2	2	1	6	6	6	4	5	5	5	3	3	0
MSA=	0	1	0	0	0	0	0	0	1	1	1	0	0	0	0	0	0	0
	1	0	1	1	0	0	0	0	0	0	0	0	0	0	0	0	0	0
	0	1	0	0	1	1	0	0	0	0	0	0	0	0	0	0	0	0
	0	1	0	0	0	0	1	0	0	0	0	1	0	0	0	0	0	0
	0	0	1	0	0	0	0	0	0	0	0	0	1	1	1	0	0	0
	0	0	1	0	0	0	0	1	0	0	0	0	0	0	0	1	0	0
	0	0	0	1	0	0	0	1	0	0	0	0	0	0	0	0	1	0
	0	0	0	0	0	1	1	0	0	0	0	0	0	0	0	0	0	1
	1	0	0	0	0	0	0	0	0	0	0	0	0	0	0	0	0	0
	1	0	0	0	0	0	0	0	0	0	0	0	0	0	0	0	0	0
	1	0	0	0	0	0	0	0	0	0	0	0	0	0	0	0	0	0
	0	0	0	1	0	0	0	0	0	0	0	0	0	0	0	0	0	0
	0	0	0	0	1	0	0	0	0	0	0	0	0	0	0	0	0	0
	0	0	0	0	1	0	0	0	0	0	0	0	0	0	0	0	0	0
	0	0	0	0	1	0	0	0	0	0	0	0	0	0	0	0	0	0
	0	0	0	0	0	1	0	0	0	0	0	0	0	0	0	0	0	0
	0	0	0	0	0	0	1	0	0	0	0	0	0	0	0	0	0	0
	0	0	0	0	0	0	0	1	0	0	0	0	0	0	0	0	0	0
MSAB=	0	1	2	2	0	0	0	0	1	1	1	0	0	0	0	0	0	0
	1	0	1	1	2	2	2	0	2	2	2	2	0	0	0	0	0	0
	2	1	0	2	1	1	0	2	0	0	0	0	2	2	2	2	0	0
	2	1	2	0	0	0	1	2	0	0	0	1	0	0	0	0	2	0
	0	2	1	0	0	2	0	0	0	0	0	0	1	1	1	0	0	0
	0	2	1	0	2	0	2	1	0	0	0	0	0	0	0	1	0	2
	0	2	0	1	0	2	0	1	0	0	0	2	0	0	0	0	1	2
	0	0	2	2	0	1	1	0	0	0	0	0	0	0	0	2	2	1
	1	2	0	0	0	0	0	0	0	2	2	0	0	0	0	0	0	0
	1	2	0	0	0	0	0	0	2	0	2	0	0	0	0	0	0	0
	1	2	0	0	0	0	0	0	2	2	0	0	0	0	0	0	0	0
	0	2	0	1	0	0	2	0	0	0	0	0	0	0	0	0	0	0
	0	0	2	0	1	0	0	0	0	0	0	0	0	2	2	0	0	0
	0	0	2	0	1	0	0	0	0	0	0	0	2	0	2	0	0	0
	0	0	2	0	1	0	0	0	0	0	0	0	2	2	0	0	0	0
	0	0	2	0	0	1	0	2	0	0	0	0	0	0	0	0	0	0
	0	0	0	2	0	0	1	2	0	0	0	0	0	0	0	0	0	0
	0	0	0	0	0	2	2	1	0	0	0	0	0	0	0	0	0	0
MSABC=	0	1	2	2	3	3	3	0	1	1	1	3	0	0	0	0	0	0
	1	0	1	1	2	2	2	3	2	2	2	2	3	3	3	3	3	0
	2	1	0	2	1	1	3	2	3	3	3	3	2	2	2	2	0	3
	2	1	2	0	3	3	1	2	3	3	3	1	0	0	0	0	2	3
	3	2	1	3	0	2	0	3	0	0	0	0	1	1	1	3	0	0
	3	2	1	3	2	0	2	1	0	0	0	0	3	3	3	1	3	2
	3	2	3	1	0	2	0	1	0	0	0	2	0	0	0	3	1	2
	0	3	2	2	3	1	1	0	0	0	0	3	0	0	0	2	2	1
	1	2	3	3	0	0	0	0	0	2	2	0	0	0	0	0	0	0
	1	2	3	3	0	0	0	0	2	0	2	0	0	0	0	0	0	0
	1	2	3	3	0	0	0	0	2	2	0	0	0	0	0	0	0	0
	3	2	3	1	0	0	2	3	0	0	0	0	0	0	0	0	3	0
	0	3	2	0	1	3	0	0	0	0	0	0	0	2	2	0	0	0
	0	3	2	0	1	3	0	0	0	0	0	0	2	0	2	0	0	0
	0	3	2	0	1	3	0	0	0	0	0	0	2	2	0	0	0	0
	0	3	2	0	3	1	3	2	0	0	0	0	0	0	0	0	0	3
	0	3	0	2	0	3	1	2	0	0	0	3	0	0	0	0	0	3
	0	0	3	3	0	2	2	1	0	0	0	0	0	0	0	3	3	0
MSbon=	0	1	0	0	0	0	0	0	1	1	1	0	0	0	0	0	0	0
	1	0	1.5	1.5	0	0	0	0	0	0	0	0	0	0	0	0	0	0
	0	1.5	0	0	1	1.5	0	0	0	0	0	0	0	0	0	0	0	0
	0	1.5	0	0	0	0	1.5	0	0	0	0	1	0	0	0	0	0	0
	0	0	1	0	0	0	0	0	0	0	0	0	1	1	1	0	0	0
	0	0	1.5	0	0	0	0	1.5	0	0	0	0	0	0	0	1	0	0
	0	0	0	1.5	0	0	0	1.5	0	0	0	0	0	0	0	0	1	0
	0	0	0	0	0	1.5	1.5	0	0	0	0	0	0	0	0	0	0	1
	1	0	0	0	0	0	0	0	0	0	0	0	0	0	0	0	0	0
	1	0	0	0	0	0	0	0	0	0	0	0	0	0	0	0	0	0
	1	0	0	0	0	0	0	0	0	0	0	0	0	0	0	0	0	0
	0	0	0	1	0	0	0	0	0	0	0	0	0	0	0	0	0	0
	0	0	0	0	1	0	0	0	0	0	0	0	0	0	0	0	0	0
	0	0	0	0	1	0	0	0	0	0	0	0	0	0	0	0	0	0
	0	0	0	0	1	0	0	0	0	0	0	0	0	0	0	0	0	0
	0	0	0	0	0	1	0	0	0	0	0	0	0	0	0	0	0	0
	0	0	0	0	0	0	1	0	0	0	0	0	0	0	0	0	0	0
	0	0	0	0	0	0	0	1	0	0	0	0	0	0	0	0	0	0
MSABC_aro=	0	1	2	2	0	3	3	0	0	0	0	0	0	0	0	0	0	0
	0	0	1	1	0	2	2	3	0	0	0	0	0	0	0	0	0	0
	0	1	0	2	0	1	3	2	0	0	0	0	0	0	0	0	0	0
	0	1	2	0	0	3	1	2	0	0	0	0	0	0	0	0	0	0
	0	2	1	3	0	2	0	3	0	0	0	0	0	0	0	0	0	0
	0	2	1	3	0	0	2	1	0	0	0	0	0	0	0	0	0	0
	0	2	3	1	0	2	0	1	0	0	0	0	0	0	0	0	0	0
	0	3	2	2	0	1	1	0	0	0	0	0	0	0	0	0	0	0
	0	2	3	3	0	0	0	0	0	0	0	0	0	0	0	0	0	0
	0	2	3	3	0	0	0	0	0	0	0	0	0	0	0	0	0	0
	0	2	3	3	0	0	0	0	0	0	0	0	0	0	0	0	0	0
	0	2	3	1	0	0	2	3	0	0	0	0	0	0	0	0	0	0
	0	3	2	0	0	3	0	0	0	0	0	0	0	0	0	0	0	0
	0	3	2	0	0	3	0	0	0	0	0	0	0	0	0	0	0	0
	0	3	2	0	0	3	0	0	0	0	0	0	0	0	0	0	0	0
	0	3	2	0	0	1	3	2	0	0	0	0	0	0	0	0	0	0
	0	3	0	2	0	3	1	2	0	0	0	0	0	0	0	0	0	0
	0	0	3	3	0	2	2	1	0	0	0	0	0	0	0	0	0	0
MSABC_cyc=	0	0	0	0	0	0	0	0	0	0	0	0	0	0	0	0	0	0
	0	0	0	0	0	0	0	0	0	0	0	0	0	0	0	0	0	0
	0	0	0	0	0	0	0	0	0	0	0	0	0	0	0	0	0	0
	0	0	0	0	0	0	0	0	0	0	0	0	0	0	0	0	0	0
	0	0	0	0	0	0	0	0	0	0	0	0	0	0	0	0	0	0
	0	0	0	0	0	0	0	0	0	0	0	0	0	0	0	0	0	0
	0	0	0	0	0	0	0	0	0	0	0	0	0	0	0	0	0	0
	0	0	0	0	0	0	0	0	0	0	0	0	0	0	0	0	0	0
	0	0	0	0	0	0	0	0	0	0	0	0	0	0	0	0	0	0
	0	0	0	0	0	0	0	0	0	0	0	0	0	0	0	0	0	0
	0	0	0	0	0	0	0	0	0	0	0	0	0	0	0	0	0	0
	0	0	0	0	0	0	0	0	0	0	0	0	0	0	0	0	0	0
	0	0	0	0	0	0	0	0	0	0	0	0	0	0	0	0	0	0
	0	0	0	0	0	0	0	0	0	0	0	0	0	0	0	0	0	0
	0	0	0	0	0	0	0	0	0	0	0	0	0	0	0	0	0	0
	0	0	0	0	0	0	0	0	0	0	0	0	0	0	0	0	0	0
	0	0	0	0	0	0	0	0	0	0	0	0	0	0	0	0	0	0
	0	0	0	0	0	0	0	0	0	0	0	0	0	0	0	0	0	0
MSbon_cyc=	0	0	0	0	0	0	0	0	0	0	0	0	0	0	0	0	0	0
	0	0	0	0	0	0	0	0	0	0	0	0	0	0	0	0	0	0
	0	0	0	0	0	0	0	0	0	0	0	0	0	0	0	0	0	0
	0	0	0	0	0	0	0	0	0	0	0	0	0	0	0	0	0	0
	0	0	0	0	0	0	0	0	0	0	0	0	0	0	0	0	0	0
	0	0	0	0	0	0	0	0	0	0	0	0	0	0	0	0	0	0
	0	0	0	0	0	0	0	0	0	0	0	0	0	0	0	0	0	0
	0	0	0	0	0	0	0	0	0	0	0	0	0	0	0	0	0	0
	0	0	0	0	0	0	0	0	0	0	0	0	0	0	0	0	0	0
	0	0	0	0	0	0	0	0	0	0	0	0	0	0	0	0	0	0
	0	0	0	0	0	0	0	0	0	0	0	0	0	0	0	0	0	0
	0	0	0	0	0	0	0	0	0	0	0	0	0	0	0	0	0	0
	0	0	0	0	0	0	0	0	0	0	0	0	0	0	0	0	0	0
	0	0	0	0	0	0	0	0	0	0	0	0	0	0	0	0	0	0
	0	0	0	0	0	0	0	0	0	0	0	0	0	0	0	0	0	0
	0	0	0	0	0	0	0	0	0	0	0	0	0	0	0	0	0	0
	0	0	0	0	0	0	0	0	0	0	0	0	0	0	0	0	0	0
	0	0	0	0	0	0	0	0	0	0	0	0	0	0	0	0	0	0
H-supressed
1.Property of atoms are shown as:
atom:	C	C	C	C	C	C	C	C
wei_H=[	12.011	12.011	12.011	12.011	12.011	12.011	12.011	12.011	]
ele_H=[	2.55	2.55	2.55	2.55	2.55	2.55	2.55	2.55	]
ion_H=[	11.26	11.26	11.26	11.26	11.26	11.26	11.26	11.26	]
rad_H=[	0.91	0.91	0.91	0.91	0.91	0.91	0.91	0.91	]
noe_H=[	4	4	4	4	4	4	4	4	]
nes_H=[	2	2	2	2	2	2	2	2	]
bra_H=[	1	3	3	2	1	2	2	2	]
2.Property matrices are shown as:
MPwei_H=	12.011		MPele_H=	2.55		MPion_H=	11.26		MPrad_H=	0.91		MPnoe_H=	4		MPnoe_H_nes_H=	2		MPbra_H=	1
	12.011			2.55			11.26			0.91			4			2			3
	12.011			2.55			11.26			0.91			4			2			3
	12.011			2.55			11.26			0.91			4			2			2
	12.011			2.55			11.26			0.91			4			2			1
	12.011			2.55			11.26			0.91			4			2			2
	12.011			2.55			11.26			0.91			4			2			2
	12.011			2.55			11.26			0.91			4			2			2
3. Step matrix are shown as:
MSF_H=	0	1	2	2	3	3	3	4
	1	0	1	1	2	2	2	3
	2	1	0	2	1	1	3	2
	2	1	2	0	3	3	1	2
	3	2	1	3	0	2	4	3
	3	2	1	3	2	0	2	1
	3	2	3	1	4	2	0	1
	4	3	2	2	3	1	1	0
MSA_H=	0	1	0	0	0	0	0	0
	1	0	1	1	0	0	0	0
	0	1	0	0	1	1	0	0
	0	1	0	0	0	0	1	0
	0	0	1	0	0	0	0	0
	0	0	1	0	0	0	0	1
	0	0	0	1	0	0	0	1
	0	0	0	0	0	1	1	0
MSAB_H=	0	1	2	2	0	0	0	0
	1	0	1	1	2	2	2	0
	2	1	0	2	1	1	0	2
	2	1	2	0	0	0	1	2
	0	2	1	0	0	2	0	0
	0	2	1	0	2	0	2	1
	0	2	0	1	0	2	0	1
	0	0	2	2	0	1	1	0
MSABC_H=	0	1	2	2	3	3	3	0
	1	0	1	1	2	2	2	3
	2	1	0	2	1	1	3	2
	2	1	2	0	3	3	1	2
	3	2	1	3	0	2	0	3
	3	2	1	3	2	0	2	1
	3	2	3	1	0	2	0	1
	0	3	2	2	3	1	1	0
MSbon_H=	0	1	0	0	0	0	0	0
	1	0	1.5	1.5	0	0	0	0
	0	1.5	0	0	1	1.5	0	0
	0	1.5	0	0	0	0	1.5	0
	0	0	1	0	0	0	0	0
	0	0	1.5	0	0	0	0	1.5
	0	0	0	1.5	0	0	0	1.5
	0	0	0	0	0	1.5	1.5	0
MSABC_aro_H=	0	1	2	2	0	3	3	0
	0	0	1	1	0	2	2	3
	0	1	0	2	0	1	3	2
	0	1	2	0	0	3	1	2
	0	2	1	3	0	2	0	3
	0	2	1	3	0	0	2	1
	0	2	3	1	0	2	0	1
	0	3	2	2	0	1	1	0
MSABC_cyc_H=	0	0	0	0	0	0	0	0
	0	0	0	0	0	0	0	0
	0	0	0	0	0	0	0	0
	0	0	0	0	0	0	0	0
	0	0	0	0	0	0	0	0
	0	0	0	0	0	0	0	0
	0	0	0	0	0	0	0	0
	0	0	0	0	0	0	0	0
MSbon_cyc_H=	0	0	0	0	0	0	0	0
	0	0	0	0	0	0	0	0
	0	0	0	0	0	0	0	0
	0	0	0	0	0	0	0	0
	0	0	0	0	0	0	0	0
	0	0	0	0	0	0	0	0
	0	0	0	0	0	0	0	0
	0	0	0	0	0	0	0	0
4. Atomic distribution matrices (M) and norm indexes (I)are shown as:
M1=	0	6.5025	0	0	0	0	0	0	5.61	5.61	5.61	0	0	0	0	0	0	0
	6.5025	0	6.5025	6.5025	0	0	0	0	0	0	0	0	0	0	0	0	0	0
	0	6.5025	0	0	6.5025	6.5025	0	0	0	0	0	0	0	0	0	0	0	0
	0	6.5025	0	0	0	0	6.5025	0	0	0	0	5.61	0	0	0	0	0	0
	0	0	6.5025	0	0	0	0	0	0	0	0	0	5.61	5.61	5.61	0	0	0
	0	0	6.5025	0	0	0	0	6.5025	0	0	0	0	0	0	0	5.61	0	0
	0	0	0	6.5025	0	0	0	6.5025	0	0	0	0	0	0	0	0	5.61	0
	0	0	0	0	0	6.5025	6.5025	0	0	0	0	0	0	0	0	0	0	5.61
	5.61	0	0	0	0	0	0	0	0	0	0	0	0	0	0	0	0	0
	5.61	0	0	0	0	0	0	0	0	0	0	0	0	0	0	0	0	0
	5.61	0	0	0	0	0	0	0	0	0	0	0	0	0	0	0	0	0
	0	0	0	5.61	0	0	0	0	0	0	0	0	0	0	0	0	0	0
	0	0	0	0	5.61	0	0	0	0	0	0	0	0	0	0	0	0	0
	0	0	0	0	5.61	0	0	0	0	0	0	0	0	0	0	0	0	0
	0	0	0	0	5.61	0	0	0	0	0	0	0	0	0	0	0	0	0
	0	0	0	0	0	5.61	0	0	0	0	0	0	0	0	0	0	0	0
	0	0	0	0	0	0	5.61	0	0	0	0	0	0	0	0	0	0	0
	0	0	0	0	0	0	0	5.61	0	0	0	0	0	0	0	0	0	0
M2=	0	4	0	0	0	0	0	0	2	2	2	0	0	0	0	0	0	0
	4	0	4	4	0	0	0	0	0	0	0	0	0	0	0	0	0	0
	0	4	0	0	4	4	0	0	0	0	0	0	0	0	0	0	0	0
	0	4	0	0	0	0	4	0	0	0	0	2	0	0	0	0	0	0
	0	0	4	0	0	0	0	0	0	0	0	0	2	2	2	0	0	0
	0	0	4	0	0	0	0	4	0	0	0	0	0	0	0	2	0	0
	0	0	0	4	0	0	0	4	0	0	0	0	0	0	0	0	2	0
	0	0	0	0	0	4	4	0	0	0	0	0	0	0	0	0	0	2
	2	0	0	0	0	0	0	0	0	0	0	0	0	0	0	0	0	0
	2	0	0	0	0	0	0	0	0	0	0	0	0	0	0	0	0	0
	2	0	0	0	0	0	0	0	0	0	0	0	0	0	0	0	0	0
	0	0	0	2	0	0	0	0	0	0	0	0	0	0	0	0	0	0
	0	0	0	0	2	0	0	0	0	0	0	0	0	0	0	0	0	0
	0	0	0	0	2	0	0	0	0	0	0	0	0	0	0	0	0	0
	0	0	0	0	2	0	0	0	0	0	0	0	0	0	0	0	0	0
	0	0	0	0	0	2	0	0	0	0	0	0	0	0	0	0	0	0
	0	0	0	0	0	0	2	0	0	0	0	0	0	0	0	0	0	0
	0	0	0	0	0	0	0	2	0	0	0	0	0	0	0	0	0	0
M3=	0	126.788	0	0	0	0	0	0	153.113	153.113	153.113	0	0	0	0	0	0	0
	126.788	0	190.181	190.181	0	0	0	0	0	0	0	0	0	0	0	0	0	0
	0	190.181	0	0	126.788	190.181	0	0	0	0	0	0	0	0	0	0	0	0
	0	190.181	0	0	0	0	190.181	0	0	0	0	153.113	0	0	0	0	0	0
	0	0	126.788	0	0	0	0	0	0	0	0	0	153.113	153.113	153.113	0	0	0
	0	0	190.181	0	0	0	0	190.181	0	0	0	0	0	0	0	153.113	0	0
	0	0	0	190.181	0	0	0	190.181	0	0	0	0	0	0	0	0	153.113	0
	0	0	0	0	0	190.181	190.181	0	0	0	0	0	0	0	0	0	0	153.113
	153.113	0	0	0	0	0	0	0	0	0	0	0	0	0	0	0	0	0
	153.113	0	0	0	0	0	0	0	0	0	0	0	0	0	0	0	0	0
	153.113	0	0	0	0	0	0	0	0	0	0	0	0	0	0	0	0	0
	0	0	0	153.113	0	0	0	0	0	0	0	0	0	0	0	0	0	0
	0	0	0	0	153.113	0	0	0	0	0	0	0	0	0	0	0	0	0
	0	0	0	0	153.113	0	0	0	0	0	0	0	0	0	0	0	0	0
	0	0	0	0	153.113	0	0	0	0	0	0	0	0	0	0	0	0	0
	0	0	0	0	0	153.113	0	0	0	0	0	0	0	0	0	0	0	0
	0	0	0	0	0	0	153.113	0	0	0	0	0	0	0	0	0	0	0
	0	0	0	0	0	0	0	153.113	0	0	0	0	0	0	0	0	0	0
M4=	0	4	0	0	0	0	0	0
	4	0	6	6	0	0	0	0
	0	6	0	0	4	6	0	0
	0	6	0	0	0	0	6	0
	0	0	4	0	0	0	0	0
	0	0	6	0	0	0	0	6
	0	0	0	6	0	0	0	6
	0	0	0	0	0	6	6	0
M5=	586.128	586.128	586.128	586.128	586.128	586.128	586.128	586.128	707.83	707.83	707.83	707.83	707.83	707.83	707.83	707.83	707.83	707.83
	380.363	380.363	380.363	380.363	380.363	380.363	380.363	380.363	459.34	459.34	459.34	459.34	459.34	459.34	459.34	459.34	459.34	459.34
	380.363	380.363	380.363	380.363	380.363	380.363	380.363	380.363	459.34	459.34	459.34	459.34	459.34	459.34	459.34	459.34	459.34	459.34
	406.689	406.689	406.689	406.689	406.689	406.689	406.689	406.689	491.133	491.133	491.133	491.133	491.133	491.133	491.133	491.133	491.133	491.133
	586.128	586.128	586.128	586.128	586.128	586.128	586.128	586.128	707.83	707.83	707.83	707.83	707.83	707.83	707.83	707.83	707.83	707.83
	406.689	406.689	406.689	406.689	406.689	406.689	406.689	406.689	491.133	491.133	491.133	491.133	491.133	491.133	491.133	491.133	491.133	491.133
	406.689	406.689	406.689	406.689	406.689	406.689	406.689	406.689	491.133	491.133	491.133	491.133	491.133	491.133	491.133	491.133	491.133	491.133
	406.689	406.689	406.689	406.689	406.689	406.689	406.689	406.689	491.133	491.133	491.133	491.133	491.133	491.133	491.133	491.133	491.133	491.133
	126.788	126.788	126.788	126.788	126.788	126.788	126.788	126.788	153.113	153.113	153.113	153.113	153.113	153.113	153.113	153.113	153.113	153.113
	126.788	126.788	126.788	126.788	126.788	126.788	126.788	126.788	153.113	153.113	153.113	153.113	153.113	153.113	153.113	153.113	153.113	153.113
	126.788	126.788	126.788	126.788	126.788	126.788	126.788	126.788	153.113	153.113	153.113	153.113	153.113	153.113	153.113	153.113	153.113	153.113
	126.788	126.788	126.788	126.788	126.788	126.788	126.788	126.788	153.113	153.113	153.113	153.113	153.113	153.113	153.113	153.113	153.113	153.113
	126.788	126.788	126.788	126.788	126.788	126.788	126.788	126.788	153.113	153.113	153.113	153.113	153.113	153.113	153.113	153.113	153.113	153.113
	126.788	126.788	126.788	126.788	126.788	126.788	126.788	126.788	153.113	153.113	153.113	153.113	153.113	153.113	153.113	153.113	153.113	153.113
	126.788	126.788	126.788	126.788	126.788	126.788	126.788	126.788	153.113	153.113	153.113	153.113	153.113	153.113	153.113	153.113	153.113	153.113
	126.788	126.788	126.788	126.788	126.788	126.788	126.788	126.788	153.113	153.113	153.113	153.113	153.113	153.113	153.113	153.113	153.113	153.113
	126.788	126.788	126.788	126.788	126.788	126.788	126.788	126.788	153.113	153.113	153.113	153.113	153.113	153.113	153.113	153.113	153.113	153.113
	126.788	126.788	126.788	126.788	126.788	126.788	126.788	126.788	153.113	153.113	153.113	153.113	153.113	153.113	153.113	153.113	153.113	153.113
M6=	33.0092	33.0092	33.0092	33.0092	33.0092	33.0092	33.0092	33.0092	11.0031	11.0031	11.0031	11.0031	11.0031	11.0031	11.0031	11.0031	11.0031	11.0031
	0	0	0	0	0	0	0	0	44.0122	44.0122	44.0122	44.0122	44.0122	44.0122	44.0122	44.0122	44.0122	44.0122
	0	0	0	0	0	0	0	0	44.0122	44.0122	44.0122	44.0122	44.0122	44.0122	44.0122	44.0122	44.0122	44.0122
	11.0031	11.0031	11.0031	11.0031	11.0031	11.0031	11.0031	11.0031	33.0092	33.0092	33.0092	33.0092	33.0092	33.0092	33.0092	33.0092	33.0092	33.0092
	33.0092	33.0092	33.0092	33.0092	33.0092	33.0092	33.0092	33.0092	11.0031	11.0031	11.0031	11.0031	11.0031	11.0031	11.0031	11.0031	11.0031	11.0031
	11.0031	11.0031	11.0031	11.0031	11.0031	11.0031	11.0031	11.0031	33.0092	33.0092	33.0092	33.0092	33.0092	33.0092	33.0092	33.0092	33.0092	33.0092
	11.0031	11.0031	11.0031	11.0031	11.0031	11.0031	11.0031	11.0031	33.0092	33.0092	33.0092	33.0092	33.0092	33.0092	33.0092	33.0092	33.0092	33.0092
	11.0031	11.0031	11.0031	11.0031	11.0031	11.0031	11.0031	11.0031	33.0092	33.0092	33.0092	33.0092	33.0092	33.0092	33.0092	33.0092	33.0092	33.0092
	0	0	0	0	0	0	0	0	11.0031	11.0031	11.0031	11.0031	11.0031	11.0031	11.0031	11.0031	11.0031	11.0031
	0	0	0	0	0	0	0	0	11.0031	11.0031	11.0031	11.0031	11.0031	11.0031	11.0031	11.0031	11.0031	11.0031
	0	0	0	0	0	0	0	0	11.0031	11.0031	11.0031	11.0031	11.0031	11.0031	11.0031	11.0031	11.0031	11.0031
	0	0	0	0	0	0	0	0	11.0031	11.0031	11.0031	11.0031	11.0031	11.0031	11.0031	11.0031	11.0031	11.0031
	0	0	0	0	0	0	0	0	11.0031	11.0031	11.0031	11.0031	11.0031	11.0031	11.0031	11.0031	11.0031	11.0031
	0	0	0	0	0	0	0	0	11.0031	11.0031	11.0031	11.0031	11.0031	11.0031	11.0031	11.0031	11.0031	11.0031
	0	0	0	0	0	0	0	0	11.0031	11.0031	11.0031	11.0031	11.0031	11.0031	11.0031	11.0031	11.0031	11.0031
	0	0	0	0	0	0	0	0	11.0031	11.0031	11.0031	11.0031	11.0031	11.0031	11.0031	11.0031	11.0031	11.0031
	0	0	0	0	0	0	0	0	11.0031	11.0031	11.0031	11.0031	11.0031	11.0031	11.0031	11.0031	11.0031	11.0031
	0	0	0	0	0	0	0	0	11.0031	11.0031	11.0031	11.0031	11.0031	11.0031	11.0031	11.0031	11.0031	11.0031
M7=	0	0	0	0	0	0	0	0	1	1	1	0	0	0	0	0	0	0
	0	0	0	0	0	0	0	0	0	0	0	0	0	0	0	0	0	0
	0	0	0	0	0	0	0	0	0	0	0	0	0	0	0	0	0	0
	0	0	0	0	0	0	0	0	0	0	0	1	0	0	0	0	0	0
	0	0	0	0	0	0	0	0	0	0	0	0	1	1	1	0	0	0
	0	0	0	0	0	0	0	0	0	0	0	0	0	0	0	1	0	0
	0	0	0	0	0	0	0	0	0	0	0	0	0	0	0	0	1	0
	0	0	0	0	0	0	0	0	0	0	0	0	0	0	0	0	0	1
	1	0	0	0	0	0	0	0	0	0	0	0	0	0	0	0	0	0
	1	0	0	0	0	0	0	0	0	0	0	0	0	0	0	0	0	0
	1	0	0	0	0	0	0	0	0	0	0	0	0	0	0	0	0	0
	0	0	0	1	0	0	0	0	0	0	0	0	0	0	0	0	0	0
	0	0	0	0	1	0	0	0	0	0	0	0	0	0	0	0	0	0
	0	0	0	0	1	0	0	0	0	0	0	0	0	0	0	0	0	0
	0	0	0	0	1	0	0	0	0	0	0	0	0	0	0	0	0	0
	0	0	0	0	0	1	0	0	0	0	0	0	0	0	0	0	0	0
	0	0	0	0	0	0	1	0	0	0	0	0	0	0	0	0	0	0
	0	0	0	0	0	0	0	1	0	0	0	0	0	0	0	0	0	0
M8=	0	4	0	0	0	0	0	0
	4	0	4	4	0	0	0	0
	0	4	0	0	4	4	0	0
	0	4	0	0	0	0	4	0
	0	0	4	0	0	0	0	0
	0	0	4	0	0	0	0	4
	0	0	0	4	0	0	0	4
	0	0	0	0	0	4	4	0
M9=	0	0	0	0	0	0	0	0	3	3	3	0	0	0	0	0	0	0
	0	0	0	0	0	0	0	0	6	6	6	6	0	0	0	0	0	0
	0	0	0	0	0	0	0	0	0	0	0	0	6	6	6	6	0	0
	0	0	0	0	0	0	0	0	0	0	0	3	0	0	0	0	6	0
	0	0	0	0	0	0	0	0	0	0	0	0	3	3	3	0	0	0
	0	0	0	0	0	0	0	0	0	0	0	0	0	0	0	3	0	6
	0	0	0	0	0	0	0	0	0	0	0	6	0	0	0	0	3	6
	0	0	0	0	0	0	0	0	0	0	0	0	0	0	0	6	6	3
	3	6	0	0	0	0	0	0	0	0	0	0	0	0	0	0	0	0
	3	6	0	0	0	0	0	0	0	0	0	0	0	0	0	0	0	0
	3	6	0	0	0	0	0	0	0	0	0	0	0	0	0	0	0	0
	0	6	0	3	0	0	6	0	0	0	0	0	0	0	0	0	0	0
	0	0	6	0	3	0	0	0	0	0	0	0	0	0	0	0	0	0
	0	0	6	0	3	0	0	0	0	0	0	0	0	0	0	0	0	0
	0	0	6	0	3	0	0	0	0	0	0	0	0	0	0	0	0	0
	0	0	6	0	0	3	0	6	0	0	0	0	0	0	0	0	0	0
	0	0	0	6	0	0	3	6	0	0	0	0	0	0	0	0	0	0
	0	0	0	0	0	6	6	3	0	0	0	0	0	0	0	0	0	0
M10=	0	0	0	0	0	0	0	0	1	1	1	3	0	0	0	0	0	0
	0	0	0	0	0	0	0	0	2	2	2	2	3	3	3	3	3	0
	0	0	0	0	0	0	0	0	3	3	3	3	2	2	2	2	0	3
	0	0	0	0	0	0	0	0	3	3	3	1	0	0	0	0	2	3
	0	0	0	0	0	0	0	0	0	0	0	0	1	1	1	3	0	0
	0	0	0	0	0	0	0	0	0	0	0	0	3	3	3	1	3	2
	0	0	0	0	0	0	0	0	0	0	0	2	0	0	0	3	1	2
	0	0	0	0	0	0	0	0	0	0	0	3	0	0	0	2	2	1
	1	2	3	3	0	0	0	0	0	0	0	0	0	0	0	0	0	0
	1	2	3	3	0	0	0	0	0	0	0	0	0	0	0	0	0	0
	1	2	3	3	0	0	0	0	0	0	0	0	0	0	0	0	0	0
	3	2	3	1	0	0	2	3	0	0	0	0	0	0	0	0	0	0
	0	3	2	0	1	3	0	0	0	0	0	0	0	0	0	0	0	0
	0	3	2	0	1	3	0	0	0	0	0	0	0	0	0	0	0	0
	0	3	2	0	1	3	0	0	0	0	0	0	0	0	0	0	0	0
	0	3	2	0	3	1	3	2	0	0	0	0	0	0	0	0	0	0
	0	3	0	2	0	3	1	2	0	0	0	0	0	0	0	0	0	0
	0	0	3	3	0	2	2	1	0	0	0	0	0	0	0	0	0	0
M11=	0	0	0	0	0	0	0	0
	0	0	0	0	0	0	0	0
	0	0	0	0	0	0	0	0
	0	0	0	0	0	0	0	0
	0	0	0	0	0	0	0	0
	0	0	0	0	0	0	0	0
	0	0	0	0	0	0	0	0
	0	0	0	0	0	0	0	0
M12=	0	16	32	32	48	48	48	64
	16	0	16	16	32	32	32	48
	32	16	0	32	16	16	48	32
	32	16	32	0	48	48	16	32
	48	32	16	48	0	32	64	48
	48	32	16	48	32	0	32	16
	48	32	48	16	64	32	0	16
	64	48	32	32	48	16	16	0
M13=	0	16	32	32	48	48	48	0
	16	0	16	16	32	32	32	48
	32	16	0	32	16	16	48	32
	32	16	32	0	48	48	16	32
	48	32	16	48	0	32	0	48
	48	32	16	48	32	0	32	16
	48	32	48	16	0	32	0	16
	0	48	32	32	48	16	16	0
M14=	0.8281	0.8281	0.8281	0.8281	0.8281	0.8281	0.8281	0.8281
	3.3124	3.3124	3.3124	3.3124	3.3124	3.3124	3.3124	3.3124
	3.3124	3.3124	3.3124	3.3124	3.3124	3.3124	3.3124	3.3124
	2.4843	2.4843	2.4843	2.4843	2.4843	2.4843	2.4843	2.4843
	0.8281	0.8281	0.8281	0.8281	0.8281	0.8281	0.8281	0.8281
	2.4843	2.4843	2.4843	2.4843	2.4843	2.4843	2.4843	2.4843
	2.4843	2.4843	2.4843	2.4843	2.4843	2.4843	2.4843	2.4843
	2.4843	2.4843	2.4843	2.4843	2.4843	2.4843	2.4843	2.4843
M15=	0	126.788	253.575	253.575	380.363	380.363	380.363	0	153.113	153.113	153.113	459.34	0	0	0	0	0	0
	126.788	0	126.788	126.788	253.575	253.575	253.575	380.363	306.227	306.227	306.227	306.227	459.34	459.34	459.34	459.34	459.34	0
	253.575	126.788	0	253.575	126.788	126.788	380.363	253.575	459.34	459.34	459.34	459.34	306.227	306.227	306.227	306.227	0	459.34
	253.575	126.788	253.575	0	380.363	380.363	126.788	253.575	459.34	459.34	459.34	153.113	0	0	0	0	306.227	459.34
	380.363	253.575	126.788	380.363	0	253.575	0	380.363	0	0	0	0	153.113	153.113	153.113	459.34	0	0
	380.363	253.575	126.788	380.363	253.575	0	253.575	126.788	0	0	0	0	459.34	459.34	459.34	153.113	459.34	306.227
	380.363	253.575	380.363	126.788	0	253.575	0	126.788	0	0	0	306.227	0	0	0	459.34	153.113	306.227
	0	380.363	253.575	253.575	380.363	126.788	126.788	0	0	0	0	459.34	0	0	0	306.227	306.227	153.113
	153.113	306.227	459.34	459.34	0	0	0	0	0	369.811	369.811	0	0	0	0	0	0	0
	153.113	306.227	459.34	459.34	0	0	0	0	369.811	0	369.811	0	0	0	0	0	0	0
	153.113	306.227	459.34	459.34	0	0	0	0	369.811	369.811	0	0	0	0	0	0	0	0
	459.34	306.227	459.34	153.113	0	0	306.227	459.34	0	0	0	0	0	0	0	0	554.717	0
	0	459.34	306.227	0	153.113	459.34	0	0	0	0	0	0	0	369.811	369.811	0	0	0
	0	459.34	306.227	0	153.113	459.34	0	0	0	0	0	0	369.811	0	369.811	0	0	0
	0	459.34	306.227	0	153.113	459.34	0	0	0	0	0	0	369.811	369.811	0	0	0	0
	0	459.34	306.227	0	459.34	153.113	459.34	306.227	0	0	0	0	0	0	0	0	0	554.717
	0	459.34	0	306.227	0	459.34	153.113	306.227	0	0	0	554.717	0	0	0	0	0	554.717
	0	0	459.34	459.34	0	306.227	306.227	153.113	0	0	0	0	0	0	0	554.717	554.717	0
M16=	0	0.8281	0	0	0	0	0	0	0.7189	0.7189	0.7189	0	0	0	0	0	0	0
	0.8281	0	1.24215	1.24215	0	0	0	0	0	0	0	0	0	0	0	0	0	0
	0	1.24215	0	0	0.8281	1.24215	0	0	0	0	0	0	0	0	0	0	0	0
	0	1.24215	0	0	0	0	1.24215	0	0	0	0	0.7189	0	0	0	0	0	0
	0	0	0.8281	0	0	0	0	0	0	0	0	0	0.7189	0.7189	0.7189	0	0	0
	0	0	1.24215	0	0	0	0	1.24215	0	0	0	0	0	0	0	0.7189	0	0
	0	0	0	1.24215	0	0	0	1.24215	0	0	0	0	0	0	0	0	0.7189	0
	0	0	0	0	0	1.24215	1.24215	0	0	0	0	0	0	0	0	0	0	0.7189
	0.7189	0	0	0	0	0	0	0	0	0	0	0	0	0	0	0	0	0
	0.7189	0	0	0	0	0	0	0	0	0	0	0	0	0	0	0	0	0
	0.7189	0	0	0	0	0	0	0	0	0	0	0	0	0	0	0	0	0
	0	0	0	0.7189	0	0	0	0	0	0	0	0	0	0	0	0	0	0
	0	0	0	0	0.7189	0	0	0	0	0	0	0	0	0	0	0	0	0
	0	0	0	0	0.7189	0	0	0	0	0	0	0	0	0	0	0	0	0
	0	0	0	0	0.7189	0	0	0	0	0	0	0	0	0	0	0	0	0
	0	0	0	0	0	0.7189	0	0	0	0	0	0	0	0	0	0	0	0
	0	0	0	0	0	0	0.7189	0	0	0	0	0	0	0	0	0	0	0
	0	0	0	0	0	0	0	0.7189	0	0	0	0	0	0	0	0	0	0
M17=	0	4	8	8	0	0	0	0
	4	0	4	4	8	8	8	0
	8	4	0	8	4	4	0	8
	8	4	8	0	0	0	4	8
	0	8	4	0	0	8	0	0
	0	8	4	0	8	0	8	4
	0	8	0	4	0	8	0	4
	0	0	8	8	0	4	4	0
M18=	0	0	0	0	0	0	0	0
	0	0	0	0	0	0	0	0
	0	0	0	0	0	0	0	0
	0	0	0	0	0	0	0	0
	0	0	0	0	0	0	0	0
	0	0	0	0	0	0	0	0
	0	0	0	0	0	0	0	0
	0	0	0	0	0	0	0	0
M19=	0	1	2	2	0	0	0	0	3	3	3	0	0	0	0	0	0	0
	1	0	0	0	2	0	0	0	4	4	4	4	0	0	0	0	0	0
	2	0	0	0	1	0	0	0	0	0	0	0	4	4	4	4	0	0
	2	0	0	0	0	0	0	0	0	0	0	2	0	0	0	0	4	0
	0	2	1	0	0	2	0	0	0	0	0	0	3	3	3	0	0	0
	0	0	0	0	2	0	0	0	0	0	0	0	0	0	0	2	0	4
	0	0	0	0	0	0	0	0	0	0	0	4	0	0	0	0	2	4
	0	0	0	0	0	0	0	0	0	0	0	0	0	0	0	4	4	2
	3	4	0	0	0	0	0	0	0	0	0	0	0	0	0	0	0	0
	3	4	0	0	0	0	0	0	0	0	0	0	0	0	0	0	0	0
	3	4	0	0	0	0	0	0	0	0	0	0	0	0	0	0	0	0
	0	4	0	2	0	0	4	0	0	0	0	0	0	0	0	0	0	0
	0	0	4	0	3	0	0	0	0	0	0	0	0	0	0	0	0	0
	0	0	4	0	3	0	0	0	0	0	0	0	0	0	0	0	0	0
	0	0	4	0	3	0	0	0	0	0	0	0	0	0	0	0	0	0
	0	0	4	0	0	2	0	4	0	0	0	0	0	0	0	0	0	0
	0	0	0	4	0	0	2	4	0	0	0	0	0	0	0	0	0	0
	0	0	0	0	0	4	4	2	0	0	0	0	0	0	0	0	0	0
M20=	4.1405	4.1405	4.1405	4.1405	4.1405	4.1405	4.1405	4.1405
	7.4529	7.4529	7.4529	7.4529	7.4529	7.4529	7.4529	7.4529
	7.4529	7.4529	7.4529	7.4529	7.4529	7.4529	7.4529	7.4529
	6.6248	6.6248	6.6248	6.6248	6.6248	6.6248	6.6248	6.6248
	4.1405	4.1405	4.1405	4.1405	4.1405	4.1405	4.1405	4.1405
	6.6248	6.6248	6.6248	6.6248	6.6248	6.6248	6.6248	6.6248
	4.9686	4.9686	4.9686	4.9686	4.9686	4.9686	4.9686	4.9686
	4.9686	4.9686	4.9686	4.9686	4.9686	4.9686	4.9686	4.9686
M21=	0	0.8281	1.6562	1.6562	2.4843	2.4843	2.4843	0
	0.8281	0	0.8281	0.8281	1.6562	1.6562	1.6562	2.4843
	1.6562	0.8281	0	1.6562	0.8281	0.8281	2.4843	1.6562
	1.6562	0.8281	1.6562	0	2.4843	2.4843	0.8281	1.6562
	2.4843	1.6562	0.8281	2.4843	0	1.6562	0	2.4843
	2.4843	1.6562	0.8281	2.4843	1.6562	0	1.6562	0.8281
	2.4843	1.6562	2.4843	0.8281	0	1.6562	0	0.8281
	0	2.4843	1.6562	1.6562	2.4843	0.8281	0.8281	0
M22=	0.8281	0.8281	0.8281	0.8281	0.8281	0.8281	0.8281	0.8281
	3.3124	3.3124	3.3124	3.3124	3.3124	3.3124	3.3124	3.3124
	3.3124	3.3124	3.3124	3.3124	3.3124	3.3124	3.3124	3.3124
	2.4843	2.4843	2.4843	2.4843	2.4843	2.4843	2.4843	2.4843
	0.8281	0.8281	0.8281	0.8281	0.8281	0.8281	0.8281	0.8281
	2.4843	2.4843	2.4843	2.4843	2.4843	2.4843	2.4843	2.4843
	2.4843	2.4843	2.4843	2.4843	2.4843	2.4843	2.4843	2.4843
	2.4843	2.4843	2.4843	2.4843	2.4843	2.4843	2.4843	2.4843
M23=	0	0	0	0	0	0	0	0
	0	0	0	0	0	0	0	0
	0	0	0	0	0	0	0	0
	0	0	0	0	0	0	0	0
	0	0	0	0	0	0	0	0
	0	0	0	0	0	0	0	0
	0	0	0	0	0	0	0	0
	0	0	0	0	0	0	0	0
M24=	0	0	0	0	0	0	0	0	2.338	2.338	2.338	7.014	9.352	9.352	9.352	9.352	9.352	11.69
	0	0	0	0	0	0	0	0	4.676	4.676	4.676	4.676	7.014	7.014	7.014	7.014	7.014	9.352
	0	0	0	0	0	0	0	0	7.014	7.014	7.014	7.014	4.676	4.676	4.676	4.676	9.352	7.014
	0	0	0	0	0	0	0	0	7.014	7.014	7.014	2.338	9.352	9.352	9.352	9.352	4.676	7.014
	0	0	0	0	0	0	0	0	9.352	9.352	9.352	9.352	2.338	2.338	2.338	7.014	11.69	9.352
	0	0	0	0	0	0	0	0	9.352	9.352	9.352	9.352	7.014	7.014	7.014	2.338	7.014	4.676
	0	0	0	0	0	0	0	0	9.352	9.352	9.352	4.676	11.69	11.69	11.69	7.014	2.338	4.676
	0	0	0	0	0	0	0	0	11.69	11.69	11.69	7.014	9.352	9.352	9.352	4.676	4.676	2.338
	2.338	4.676	7.014	7.014	9.352	9.352	9.352	11.69	0	0	0	0	0	0	0	0	0	0
	2.338	4.676	7.014	7.014	9.352	9.352	9.352	11.69	0	0	0	0	0	0	0	0	0	0
	2.338	4.676	7.014	7.014	9.352	9.352	9.352	11.69	0	0	0	0	0	0	0	0	0	0
	7.014	4.676	7.014	2.338	9.352	9.352	4.676	7.014	0	0	0	0	0	0	0	0	0	0
	9.352	7.014	4.676	9.352	2.338	7.014	11.69	9.352	0	0	0	0	0	0	0	0	0	0
	9.352	7.014	4.676	9.352	2.338	7.014	11.69	9.352	0	0	0	0	0	0	0	0	0	0
	9.352	7.014	4.676	9.352	2.338	7.014	11.69	9.352	0	0	0	0	0	0	0	0	0	0
	9.352	7.014	4.676	9.352	7.014	2.338	7.014	4.676	0	0	0	0	0	0	0	0	0	0
	9.352	7.014	9.352	4.676	11.69	7.014	2.338	4.676	0	0	0	0	0	0	0	0	0	0
	11.69	9.352	7.014	7.014	9.352	4.676	4.676	2.338	0	0	0	0	0	0	0	0	0	0
M25=	0	0	0	0	0	0	0	0	3	3	3	0	0	0	0	0	0	0
	0	0	0	0	0	0	0	0	0	0	0	0	0	0	0	0	0	0
	0	0	0	0	0	0	0	0	0	0	0	0	0	0	0	0	0	0
	0	0	0	0	0	0	0	0	0	0	0	3	0	0	0	0	0	0
	0	0	0	0	0	0	0	0	0	0	0	0	3	3	3	0	0	0
	0	0	0	0	0	0	0	0	0	0	0	0	0	0	0	3	0	0
	0	0	0	0	0	0	0	0	0	0	0	0	0	0	0	0	3	0
	0	0	0	0	0	0	0	0	0	0	0	0	0	0	0	0	0	3
	3	0	0	0	0	0	0	0	0	0	0	0	0	0	0	0	0	0
	3	0	0	0	0	0	0	0	0	0	0	0	0	0	0	0	0	0
	3	0	0	0	0	0	0	0	0	0	0	0	0	0	0	0	0	0
	0	0	0	3	0	0	0	0	0	0	0	0	0	0	0	0	0	0
	0	0	0	0	3	0	0	0	0	0	0	0	0	0	0	0	0	0
	0	0	0	0	3	0	0	0	0	0	0	0	0	0	0	0	0	0
	0	0	0	0	3	0	0	0	0	0	0	0	0	0	0	0	0	0
	0	0	0	0	0	3	0	0	0	0	0	0	0	0	0	0	0	0
	0	0	0	0	0	0	3	0	0	0	0	0	0	0	0	0	0	0
	0	0	0	0	0	0	0	3	0	0	0	0	0	0	0	0	0	0
M26=	0	2	0	0	0	0	0	0
	2	0	0	1	0	0	0	0
	0	0	0	0	2	1	0	0
	0	1	0	0	0	0	0	0
	0	0	2	0	0	0	0	0
	0	0	1	0	0	0	0	0
	0	0	0	0	0	0	0	0
	0	0	0	0	0	0	0	0
M27=	0	126.788	0	0	0	0	0	0
	126.788	0	190.181	190.181	0	0	0	0
	0	190.181	0	0	126.788	190.181	0	0
	0	190.181	0	0	0	0	190.181	0
	0	0	126.788	0	0	0	0	0
	0	0	190.181	0	0	0	0	190.181
	0	0	0	190.181	0	0	0	190.181
	0	0	0	0	0	190.181	190.181	0
M28	0	0	0	0	0	0	0	0
	0	0	0	0	0	0	0	0
	0	0	0	0	0	0	0	0
	0	0	0	0	0	0	0	0
	0	0	0	0	0	0	0	0
	0	0	0	0	0	0	0	0
	0	0	0	0	0	0	0	0
	0	0	0	0	0	0	0	0
M29	0	1	2	2	0	3	3	4	3	3	3	9	12	12	12	12	12	15
	1	0	0	0	2	0	0	0	4	4	4	4	6	6	6	6	6	8
	2	0	0	0	1	0	0	0	6	6	6	6	4	4	4	4	8	6
	2	0	0	0	3	0	0	0	6	6	6	2	8	8	8	8	4	6
	0	2	1	3	0	2	4	3	12	12	12	12	3	3	3	9	15	12
	3	0	0	0	2	0	0	0	8	8	8	8	6	6	6	2	6	4
	3	0	0	0	4	0	0	0	8	8	8	4	10	10	10	6	2	4
	4	0	0	0	3	0	0	0	10	10	10	6	8	8	8	4	4	2
	3	4	6	6	12	8	8	10	0	0	0	0	0	0	0	0	0	0
	3	4	6	6	12	8	8	10	0	0	0	0	0	0	0	0	0	0
	3	4	6	6	12	8	8	10	0	0	0	0	0	0	0	0	0	0
	9	4	6	2	12	8	4	6	0	0	0	0	0	0	0	0	0	0
	12	6	4	8	3	6	10	8	0	0	0	0	0	0	0	0	0	0
	12	6	4	8	3	6	10	8	0	0	0	0	0	0	0	0	0	0
	12	6	4	8	3	6	10	8	0	0	0	0	0	0	0	0	0	0
	12	6	4	8	9	2	6	4	0	0	0	0	0	0	0	0	0	0
	12	6	8	4	15	6	2	4	0	0	0	0	0	0	0	0	0	0
	15	8	6	6	12	4	4	2	0	0	0	0	0	0	0	0	0	0
M30	0	0	0	0	0	0	0	0
	0	0	0	0	0	0	0	0
	0	0	0	0	0	0	0	0
	0	0	0	0	0	0	0	0
	0	0	0	0	0	0	0	0
	0	0	0	0	0	0	0	0
	0	0	0	0	0	0	0	0
	0	0	0	0	0	0	0	0
M31	0	0.8281	1.6562	1.6562	2.4843	2.4843	2.4843	3.3124
	0.8281	0	0.8281	0.8281	1.6562	1.6562	1.6562	2.4843
	1.6562	0.8281	0	1.6562	0.8281	0.8281	2.4843	1.6562
	1.6562	0.8281	1.6562	0	2.4843	2.4843	0.8281	1.6562
	2.4843	1.6562	0.8281	2.4843	0	1.6562	3.3124	2.4843
	2.4843	1.6562	0.8281	2.4843	1.6562	0	1.6562	0.8281
	2.4843	1.6562	2.4843	0.8281	3.3124	1.6562	0	0.8281
	3.3124	2.4843	1.6562	1.6562	2.4843	0.8281	0.8281	0
k	1	2	3	4	5	6	7	8	9	10	11	12	13	14	15	16	17	18	19
I1~I19	12.0133	5.77778	325.089	22.2711	673.062	30.5641	0.559017	1	203.295	68.1568	0	25.4663	18.9877	1.66309	2666003	1479.54	1778.92	0	2891.64
b1~b19	275.862	-255.851	2.26523	-5.2415	-0.993839	9.34287	227.271	-105.477	0.162387	0.614391	-0.822431	1.71906	1.68689	-139.837	5.55423e-05	-0.289797	-0.0495362	0.194503	-0.014055
k	20	21	22	23	24	25	26	27	28	29	30	31
I20~I31	4315.85	2764.15	1778.96	0	0.0221775	0.217924	0.0243646	5.66341	0	0.0271508	0	0.003187
b20~b31	-0.0242517	0.032594	0.0589633	-0.0129026	1672.37	651.558	-505.509	14.5297	585.945	1229.77	-7897.27	-85454.1
b0	-884.157
nh	0.125
ws	5.89819
sm	0.707107
ss	0.0912871
T	363.12
Cal. Density (K)	818.591

## Sheet: Eg.3
Sheet E.3 4-Methylpyridine was taken as an example to calculate the value of Density (CAS:108-89-4)
H-contained
1.Property of atoms are shown as:
atom:	C	C	C	C	C	C	N	H	H	H	H	H	H	H
wei=[	12.011	12.011	12.011	12.011	12.011	12.011	14.0067	1.00794	1.00794	1.00794	1.00794	1.00794	1.00794	1.00794	]
ele=[	2.55	2.55	2.55	2.55	2.55	2.55	3.04	2.2	2.2	2.2	2.2	2.2	2.2	2.2	]
ion=[	11.26	11.26	11.26	11.26	11.26	11.26	14.534	13.598	13.598	13.598	13.598	13.598	13.598	13.598	]
rad=[	0.91	0.91	0.91	0.91	0.91	0.91	0.75	0.79	0.79	0.79	0.79	0.79	0.79	0.79	]
noe=[	4	4	4	4	4	4	5	1	1	1	1	1	1	1	]
nes=[	2	2	2	2	2	2	2	1	1	1	1	1	1	1	]
bra=[	4	3	3	3	3	3	2	1	1	1	1	1	1	1	]
2.Property matrices are shown as:
MPwei=	12.011		MPele=	2.55		MPion=	11.26		MPrad=	0.91		MPnoe=	4		MPnoe_nes=	2		MPbra=	4
	12.011			2.55			11.26			0.91			4			2			3
	12.011			2.55			11.26			0.91			4			2			3
	12.011			2.55			11.26			0.91			4			2			3
	12.011			2.55			11.26			0.91			4			2			3
	12.011			2.55			11.26			0.91			4			2			3
	14.0067			3.04			14.534			0.75			5			2.5			2
	1.00794			2.2			13.598			0.79			1			1			1
	1.00794			2.2			13.598			0.79			1			1			1
	1.00794			2.2			13.598			0.79			1			1			1
	1.00794			2.2			13.598			0.79			1			1			1
	1.00794			2.2			13.598			0.79			1			1			1
	1.00794			2.2			13.598			0.79			1			1			1
	1.00794			2.2			13.598			0.79			1			1			1
3. Step matrix are shown as:
MSF=	0	1	2	2	3	3	4	1	1	1	3	3	4	4
	1	0	1	1	2	2	3	2	2	2	2	2	3	3
	2	1	0	2	1	3	2	3	3	3	1	3	2	4
	2	1	2	0	3	1	2	3	3	3	3	1	4	2
	3	2	1	3	0	2	1	4	4	4	2	4	1	3
	3	2	3	1	2	0	1	4	4	4	4	2	3	1
	4	3	2	2	1	1	0	5	5	5	3	3	2	2
	1	2	3	3	4	4	5	0	2	2	4	4	5	5
	1	2	3	3	4	4	5	2	0	2	4	4	5	5
	1	2	3	3	4	4	5	2	2	0	4	4	5	5
	3	2	1	3	2	4	3	4	4	4	0	4	3	5
	3	2	3	1	4	2	3	4	4	4	4	0	5	3
	4	3	2	4	1	3	2	5	5	5	3	5	0	4
	4	3	4	2	3	1	2	5	5	5	5	3	4	0
MSA=	0	1	0	0	0	0	0	1	1	1	0	0	0	0
	1	0	1	1	0	0	0	0	0	0	0	0	0	0
	0	1	0	0	1	0	0	0	0	0	1	0	0	0
	0	1	0	0	0	1	0	0	0	0	0	1	0	0
	0	0	1	0	0	0	1	0	0	0	0	0	1	0
	0	0	0	1	0	0	1	0	0	0	0	0	0	1
	0	0	0	0	1	1	0	0	0	0	0	0	0	0
	1	0	0	0	0	0	0	0	0	0	0	0	0	0
	1	0	0	0	0	0	0	0	0	0	0	0	0	0
	1	0	0	0	0	0	0	0	0	0	0	0	0	0
	0	0	1	0	0	0	0	0	0	0	0	0	0	0
	0	0	0	1	0	0	0	0	0	0	0	0	0	0
	0	0	0	0	1	0	0	0	0	0	0	0	0	0
	0	0	0	0	0	1	0	0	0	0	0	0	0	0
MSAB=	0	1	2	2	0	0	0	1	1	1	0	0	0	0
	1	0	1	1	2	2	0	2	2	2	2	2	0	0
	2	1	0	2	1	0	2	0	0	0	1	0	2	0
	2	1	2	0	0	1	2	0	0	0	0	1	0	2
	0	2	1	0	0	2	1	0	0	0	2	0	1	0
	0	2	0	1	2	0	1	0	0	0	0	2	0	1
	0	0	2	2	1	1	0	0	0	0	0	0	2	2
	1	2	0	0	0	0	0	0	2	2	0	0	0	0
	1	2	0	0	0	0	0	2	0	2	0	0	0	0
	1	2	0	0	0	0	0	2	2	0	0	0	0	0
	0	2	1	0	2	0	0	0	0	0	0	0	0	0
	0	2	0	1	0	2	0	0	0	0	0	0	0	0
	0	0	2	0	1	0	2	0	0	0	0	0	0	0
	0	0	0	2	0	1	2	0	0	0	0	0	0	0
MSABC=	0	1	2	2	3	3	0	1	1	1	3	3	0	0
	1	0	1	1	2	2	3	2	2	2	2	2	3	3
	2	1	0	2	1	3	2	3	3	3	1	3	2	0
	2	1	2	0	3	1	2	3	3	3	3	1	0	2
	3	2	1	3	0	2	1	0	0	0	2	0	1	3
	3	2	3	1	2	0	1	0	0	0	0	2	3	1
	0	3	2	2	1	1	0	0	0	0	3	3	2	2
	1	2	3	3	0	0	0	0	2	2	0	0	0	0
	1	2	3	3	0	0	0	2	0	2	0	0	0	0
	1	2	3	3	0	0	0	2	2	0	0	0	0	0
	3	2	1	3	2	0	3	0	0	0	0	0	3	0
	3	2	3	1	0	2	3	0	0	0	0	0	0	3
	0	3	2	0	1	3	2	0	0	0	3	0	0	0
	0	3	0	2	3	1	2	0	0	0	0	3	0	0
MSbon=	0	1	0	0	0	0	0	1	1	1	0	0	0	0
	1	0	1.5	1.5	0	0	0	0	0	0	0	0	0	0
	0	1.5	0	0	1.5	0	0	0	0	0	1	0	0	0
	0	1.5	0	0	0	1.5	0	0	0	0	0	1	0	0
	0	0	1.5	0	0	0	1.5	0	0	0	0	0	1	0
	0	0	0	1.5	0	0	1.5	0	0	0	0	0	0	1
	0	0	0	0	1.5	1.5	0	0	0	0	0	0	0	0
	1	0	0	0	0	0	0	0	0	0	0	0	0	0
	1	0	0	0	0	0	0	0	0	0	0	0	0	0
	1	0	0	0	0	0	0	0	0	0	0	0	0	0
	0	0	1	0	0	0	0	0	0	0	0	0	0	0
	0	0	0	1	0	0	0	0	0	0	0	0	0	0
	0	0	0	0	1	0	0	0	0	0	0	0	0	0
	0	0	0	0	0	1	0	0	0	0	0	0	0	0
MSABC_aro=	0	1	2	2	3	3	0	0	0	0	0	0	0	0
	0	0	1	1	2	2	3	0	0	0	0	0	0	0
	0	1	0	2	1	3	2	0	0	0	0	0	0	0
	0	1	2	0	3	1	2	0	0	0	0	0	0	0
	0	2	1	3	0	2	1	0	0	0	0	0	0	0
	0	2	3	1	2	0	1	0	0	0	0	0	0	0
	0	3	2	2	1	1	0	0	0	0	0	0	0	0
	0	2	3	3	0	0	0	0	0	0	0	0	0	0
	0	2	3	3	0	0	0	0	0	0	0	0	0	0
	0	2	3	3	0	0	0	0	0	0	0	0	0	0
	0	2	1	3	2	0	3	0	0	0	0	0	0	0
	0	2	3	1	0	2	3	0	0	0	0	0	0	0
	0	3	2	0	1	3	2	0	0	0	0	0	0	0
	0	3	0	2	3	1	2	0	0	0	0	0	0	0
MSABC_cyc=	0	0	0	0	0	0	0	0	0	0	0	0	0	0
	0	0	0	0	0	0	0	0	0	0	0	0	0	0
	0	0	0	0	0	0	0	0	0	0	0	0	0	0
	0	0	0	0	0	0	0	0	0	0	0	0	0	0
	0	0	0	0	0	0	0	0	0	0	0	0	0	0
	0	0	0	0	0	0	0	0	0	0	0	0	0	0
	0	0	0	0	0	0	0	0	0	0	0	0	0	0
	0	0	0	0	0	0	0	0	0	0	0	0	0	0
	0	0	0	0	0	0	0	0	0	0	0	0	0	0
	0	0	0	0	0	0	0	0	0	0	0	0	0	0
	0	0	0	0	0	0	0	0	0	0	0	0	0	0
	0	0	0	0	0	0	0	0	0	0	0	0	0	0
	0	0	0	0	0	0	0	0	0	0	0	0	0	0
	0	0	0	0	0	0	0	0	0	0	0	0	0	0
MSbon_cyc=	0	0	0	0	0	0	0	0	0	0	0	0	0	0
	0	0	0	0	0	0	0	0	0	0	0	0	0	0
	0	0	0	0	0	0	0	0	0	0	0	0	0	0
	0	0	0	0	0	0	0	0	0	0	0	0	0	0
	0	0	0	0	0	0	0	0	0	0	0	0	0	0
	0	0	0	0	0	0	0	0	0	0	0	0	0	0
	0	0	0	0	0	0	0	0	0	0	0	0	0	0
	0	0	0	0	0	0	0	0	0	0	0	0	0	0
	0	0	0	0	0	0	0	0	0	0	0	0	0	0
	0	0	0	0	0	0	0	0	0	0	0	0	0	0
	0	0	0	0	0	0	0	0	0	0	0	0	0	0
	0	0	0	0	0	0	0	0	0	0	0	0	0	0
	0	0	0	0	0	0	0	0	0	0	0	0	0	0
	0	0	0	0	0	0	0	0	0	0	0	0	0	0
H-supressed
1.Property of atoms are shown as:
atom:	C	C	C	C	C	C	N
wei_H=[	12.011	12.011	12.011	12.011	12.011	12.011	14.0067	]
ele_H=[	2.55	2.55	2.55	2.55	2.55	2.55	3.04	]
ion_H=[	11.26	11.26	11.26	11.26	11.26	11.26	14.534	]
rad_H=[	0.91	0.91	0.91	0.91	0.91	0.91	0.75	]
noe_H=[	4	4	4	4	4	4	5	]
nes_H=[	2	2	2	2	2	2	2	]
bra_H=[	1	3	2	2	2	2	2	]
2.Property matrices are shown as:
MPwei_H=	12.011		MPele_H=	2.55		MPion_H=	11.26		MPrad_H=	0.91		MPnoe_H=	4		MPnoe_H_nes_H=	2		MPbra_H=	1
	12.011			2.55			11.26			0.91			4			2			3
	12.011			2.55			11.26			0.91			4			2			2
	12.011			2.55			11.26			0.91			4			2			2
	12.011			2.55			11.26			0.91			4			2			2
	12.011			2.55			11.26			0.91			4			2			2
	14.0067			3.04			14.534			0.75			5			2.5			2
3. Step matrix are shown as:
MSF_H=	0	1	2	2	3	3	4
	1	0	1	1	2	2	3
	2	1	0	2	1	3	2
	2	1	2	0	3	1	2
	3	2	1	3	0	2	1
	3	2	3	1	2	0	1
	4	3	2	2	1	1	0
MSA_H=	0	1	0	0	0	0	0
	1	0	1	1	0	0	0
	0	1	0	0	1	0	0
	0	1	0	0	0	1	0
	0	0	1	0	0	0	1
	0	0	0	1	0	0	1
	0	0	0	0	1	1	0
MSAB_H=	0	1	2	2	0	0	0
	1	0	1	1	2	2	0
	2	1	0	2	1	0	2
	2	1	2	0	0	1	2
	0	2	1	0	0	2	1
	0	2	0	1	2	0	1
	0	0	2	2	1	1	0
MSABC_H=	0	1	2	2	3	3	0
	1	0	1	1	2	2	3
	2	1	0	2	1	3	2
	2	1	2	0	3	1	2
	3	2	1	3	0	2	1
	3	2	3	1	2	0	1
	0	3	2	2	1	1	0
MSbon_H=	0	1	0	0	0	0	0
	1	0	1.5	1.5	0	0	0
	0	1.5	0	0	1.5	0	0
	0	1.5	0	0	0	1.5	0
	0	0	1.5	0	0	0	1.5
	0	0	0	1.5	0	0	1.5
	0	0	0	0	1.5	1.5	0
MSABC_aro_H=	0	1	2	2	3	3	0
	0	0	1	1	2	2	3
	0	1	0	2	1	3	2
	0	1	2	0	3	1	2
	0	2	1	3	0	2	1
	0	2	3	1	2	0	1
	0	3	2	2	1	1	0
MSABC_cyc_H=	0	0	0	0	0	0	0
	0	0	0	0	0	0	0
	0	0	0	0	0	0	0
	0	0	0	0	0	0	0
	0	0	0	0	0	0	0
	0	0	0	0	0	0	0
	0	0	0	0	0	0	0
MSbon_cyc_H=	0	0	0	0	0	0	0
	0	0	0	0	0	0	0
	0	0	0	0	0	0	0
	0	0	0	0	0	0	0
	0	0	0	0	0	0	0
	0	0	0	0	0	0	0
	0	0	0	0	0	0	0
4. Atomic distribution matrices (M) and norm indexes (I)are shown as:
M1=	0	6.5025	0	0	0	0	0	5.61	5.61	5.61	0	0	0	0
	6.5025	0	6.5025	6.5025	0	0	0	0	0	0	0	0	0	0
	0	6.5025	0	0	6.5025	0	0	0	0	0	5.61	0	0	0
	0	6.5025	0	0	0	6.5025	0	0	0	0	0	5.61	0	0
	0	0	6.5025	0	0	0	7.752	0	0	0	0	0	5.61	0
	0	0	0	6.5025	0	0	7.752	0	0	0	0	0	0	5.61
	0	0	0	0	7.752	7.752	0	0	0	0	0	0	0	0
	5.61	0	0	0	0	0	0	0	0	0	0	0	0	0
	5.61	0	0	0	0	0	0	0	0	0	0	0	0	0
	5.61	0	0	0	0	0	0	0	0	0	0	0	0	0
	0	0	5.61	0	0	0	0	0	0	0	0	0	0	0
	0	0	0	5.61	0	0	0	0	0	0	0	0	0	0
	0	0	0	0	5.61	0	0	0	0	0	0	0	0	0
	0	0	0	0	0	5.61	0	0	0	0	0	0	0	0
M2=	0	4	0	0	0	0	0	2	2	2	0	0	0	0
	4	0	4	4	0	0	0	0	0	0	0	0	0	0
	0	4	0	0	4	0	0	0	0	0	2	0	0	0
	0	4	0	0	0	4	0	0	0	0	0	2	0	0
	0	0	4	0	0	0	5	0	0	0	0	0	2	0
	0	0	0	4	0	0	5	0	0	0	0	0	0	2
	0	0	0	0	5	5	0	0	0	0	0	0	0	0
	2	0	0	0	0	0	0	0	0	0	0	0	0	0
	2	0	0	0	0	0	0	0	0	0	0	0	0	0
	2	0	0	0	0	0	0	0	0	0	0	0	0	0
	0	0	2	0	0	0	0	0	0	0	0	0	0	0
	0	0	0	2	0	0	0	0	0	0	0	0	0	0
	0	0	0	0	2	0	0	0	0	0	0	0	0	0
	0	0	0	0	0	2	0	0	0	0	0	0	0	0
M3=	0	126.788	0	0	0	0	0	153.113	153.113	153.113	0	0	0	0
	126.788	0	190.181	190.181	0	0	0	0	0	0	0	0	0	0
	0	190.181	0	0	190.181	0	0	0	0	0	153.113	0	0	0
	0	190.181	0	0	0	190.181	0	0	0	0	0	153.113	0	0
	0	0	190.181	0	0	0	245.479	0	0	0	0	0	153.113	0
	0	0	0	190.181	0	0	245.479	0	0	0	0	0	0	153.113
	0	0	0	0	245.479	245.479	0	0	0	0	0	0	0	0
	153.113	0	0	0	0	0	0	0	0	0	0	0	0	0
	153.113	0	0	0	0	0	0	0	0	0	0	0	0	0
	153.113	0	0	0	0	0	0	0	0	0	0	0	0	0
	0	0	153.113	0	0	0	0	0	0	0	0	0	0	0
	0	0	0	153.113	0	0	0	0	0	0	0	0	0	0
	0	0	0	0	153.113	0	0	0	0	0	0	0	0	0
	0	0	0	0	0	153.113	0	0	0	0	0	0	0	0
M4=	0	4	0	0	0	0	0
	4	0	6	6	0	0	0
	0	6	0	0	6	0	0
	0	6	0	0	0	6	0
	0	0	6	0	0	0	7.5
	0	0	0	6	0	0	7.5
	0	0	0	0	7.5	7.5	0
M5=	586.128	586.128	586.128	586.128	586.128	586.128	756.553	707.83	707.83	707.83	707.83	707.83	707.83	707.83
	380.363	380.363	380.363	380.363	380.363	380.363	490.959	459.34	459.34	459.34	459.34	459.34	459.34	459.34
	406.689	406.689	406.689	406.689	406.689	406.689	524.939	491.133	491.133	491.133	491.133	491.133	491.133	491.133
	406.689	406.689	406.689	406.689	406.689	406.689	524.939	491.133	491.133	491.133	491.133	491.133	491.133	491.133
	443.554	443.554	443.554	443.554	443.554	443.554	572.523	535.652	535.652	535.652	535.652	535.652	535.652	535.652
	443.554	443.554	443.554	443.554	443.554	443.554	572.523	535.652	535.652	535.652	535.652	535.652	535.652	535.652
	253.575	253.575	253.575	253.575	253.575	253.575	327.306	306.227	306.227	306.227	306.227	306.227	306.227	306.227
	126.788	126.788	126.788	126.788	126.788	126.788	163.653	153.113	153.113	153.113	153.113	153.113	153.113	153.113
	126.788	126.788	126.788	126.788	126.788	126.788	163.653	153.113	153.113	153.113	153.113	153.113	153.113	153.113
	126.788	126.788	126.788	126.788	126.788	126.788	163.653	153.113	153.113	153.113	153.113	153.113	153.113	153.113
	126.788	126.788	126.788	126.788	126.788	126.788	163.653	153.113	153.113	153.113	153.113	153.113	153.113	153.113
	126.788	126.788	126.788	126.788	126.788	126.788	163.653	153.113	153.113	153.113	153.113	153.113	153.113	153.113
	126.788	126.788	126.788	126.788	126.788	126.788	163.653	153.113	153.113	153.113	153.113	153.113	153.113	153.113
	126.788	126.788	126.788	126.788	126.788	126.788	163.653	153.113	153.113	153.113	153.113	153.113	153.113	153.113
M6=	33.0092	33.0092	33.0092	33.0092	33.0092	33.0092	40.9921	11.0031	11.0031	11.0031	11.0031	11.0031	11.0031	11.0031
	0	0	0	0	0	0	7.98296	44.0122	44.0122	44.0122	44.0122	44.0122	44.0122	44.0122
	11.0031	11.0031	11.0031	11.0031	11.0031	11.0031	18.986	33.0092	33.0092	33.0092	33.0092	33.0092	33.0092	33.0092
	11.0031	11.0031	11.0031	11.0031	11.0031	11.0031	18.986	33.0092	33.0092	33.0092	33.0092	33.0092	33.0092	33.0092
	13.9967	13.9967	13.9967	13.9967	13.9967	13.9967	15.9924	36.0028	36.0028	36.0028	36.0028	36.0028	36.0028	36.0028
	13.9967	13.9967	13.9967	13.9967	13.9967	13.9967	15.9924	36.0028	36.0028	36.0028	36.0028	36.0028	36.0028	36.0028
	0	0	0	0	0	0	5.98722	33.0092	33.0092	33.0092	33.0092	33.0092	33.0092	33.0092
	0	0	0	0	0	0	1.99574	11.0031	11.0031	11.0031	11.0031	11.0031	11.0031	11.0031
	0	0	0	0	0	0	1.99574	11.0031	11.0031	11.0031	11.0031	11.0031	11.0031	11.0031
	0	0	0	0	0	0	1.99574	11.0031	11.0031	11.0031	11.0031	11.0031	11.0031	11.0031
	0	0	0	0	0	0	1.99574	11.0031	11.0031	11.0031	11.0031	11.0031	11.0031	11.0031
	0	0	0	0	0	0	1.99574	11.0031	11.0031	11.0031	11.0031	11.0031	11.0031	11.0031
	0	0	0	0	0	0	1.99574	11.0031	11.0031	11.0031	11.0031	11.0031	11.0031	11.0031
	0	0	0	0	0	0	1.99574	11.0031	11.0031	11.0031	11.0031	11.0031	11.0031	11.0031
M7=	0	0	0	0	0	0	0	1	1	1	0	0	0	0
	0	0	0	0	0	0	0	0	0	0	0	0	0	0
	0	0	0	0	0	0	0	0	0	0	1	0	0	0
	0	0	0	0	0	0	0	0	0	0	0	1	0	0
	0	0	0	0	0	0	0.75	0	0	0	0	0	1	0
	0	0	0	0	0	0	0.75	0	0	0	0	0	0	1
	0	0	0	0	0.75	0.75	0	0	0	0	0	0	0	0
	1	0	0	0	0	0	0	0	0	0	0	0	0	0
	1	0	0	0	0	0	0	0	0	0	0	0	0	0
	1	0	0	0	0	0	0	0	0	0	0	0	0	0
	0	0	1	0	0	0	0	0	0	0	0	0	0	0
	0	0	0	1	0	0	0	0	0	0	0	0	0	0
	0	0	0	0	1	0	0	0	0	0	0	0	0	0
	0	0	0	0	0	1	0	0	0	0	0	0	0	0
M8=	0	4	0	0	0	0	0
	4	0	4	4	0	0	0
	0	4	0	0	4	0	0
	0	4	0	0	0	4	0
	0	0	4	0	0	0	5
	0	0	0	4	0	0	5
	0	0	0	0	5	5	0
M9=	0	0	0	0	0	0	0	3	3	3	0	0	0	0
	0	0	0	0	0	0	0	6	6	6	6	6	0	0
	0	0	0	0	0	0	2	0	0	0	3	0	6	0
	0	0	0	0	0	0	2	0	0	0	0	3	0	6
	0	0	0	0	0	0	1	0	0	0	6	0	3	0
	0	0	0	0	0	0	1	0	0	0	0	6	0	3
	0	0	2	2	1	1	0	0	0	0	0	0	8	8
	3	6	0	0	0	0	0	0	0	0	0	0	0	0
	3	6	0	0	0	0	0	0	0	0	0	0	0	0
	3	6	0	0	0	0	0	0	0	0	0	0	0	0
	0	6	3	0	6	0	0	0	0	0	0	0	0	0
	0	6	0	3	0	6	0	0	0	0	0	0	0	0
	0	0	6	0	3	0	8	0	0	0	0	0	0	0
	0	0	0	6	0	3	8	0	0	0	0	0	0	0
M10=	0	0	0	0	0	0	0	1	1	1	3	3	0	0
	0	0	0	0	0	0	1.5	2	2	2	2	2	3	3
	0	0	0	0	0	0	1	3	3	3	1	3	2	0
	0	0	0	0	0	0	1	3	3	3	3	1	0	2
	0	0	0	0	0	0	0.5	0	0	0	2	0	1	3
	0	0	0	0	0	0	0.5	0	0	0	0	2	3	1
	0	1.5	1	1	0.5	0.5	0	0	0	0	4.5	4.5	3	3
	1	2	3	3	0	0	0	0	0	0	0	0	0	0
	1	2	3	3	0	0	0	0	0	0	0	0	0	0
	1	2	3	3	0	0	0	0	0	0	0	0	0	0
	3	2	1	3	2	0	4.5	0	0	0	0	0	0	0
	3	2	3	1	0	2	4.5	0	0	0	0	0	0	0
	0	3	2	0	1	3	3	0	0	0	0	0	0	0
	0	3	0	2	3	1	3	0	0	0	0	0	0	0
M11=	0	0	0	0	0	0	0
	0	0	0	0	0	0	0
	0	0	0	0	0	0	0
	0	0	0	0	0	0	0
	0	0	0	0	0	0	1
	0	0	0	0	0	0	1
	0	0	0	0	1	1	0
M12=	0	16	32	32	48	48	80
	16	0	16	16	32	32	60
	32	16	0	32	16	48	40
	32	16	32	0	48	16	40
	48	32	16	48	0	32	20
	48	32	48	16	32	0	20
	80	60	40	40	20	20	0
M13=	0	16	32	32	48	48	0
	16	0	16	16	32	32	60
	32	16	0	32	16	48	40
	32	16	32	0	48	16	40
	48	32	16	48	0	32	20
	48	32	48	16	32	0	20
	0	60	40	40	20	20	0
M14=	0.8281	0.8281	0.8281	0.8281	0.8281	0.8281	0.6825
	3.3124	3.3124	3.3124	3.3124	3.3124	3.3124	2.73
	2.4843	2.4843	2.4843	2.4843	2.4843	2.4843	2.0475
	2.4843	2.4843	2.4843	2.4843	2.4843	2.4843	2.0475
	2.2659	2.2659	2.2659	2.2659	2.2659	2.2659	1.8675
	2.2659	2.2659	2.2659	2.2659	2.2659	2.2659	1.8675
	2.4843	2.4843	2.4843	2.4843	2.4843	2.4843	2.0475
M15=	0	126.788	253.575	253.575	380.363	380.363	0	153.113	153.113	153.113	459.34	459.34	0	0
	126.788	0	126.788	126.788	253.575	253.575	490.959	306.227	306.227	306.227	306.227	306.227	459.34	459.34
	253.575	126.788	0	253.575	126.788	380.363	327.306	459.34	459.34	459.34	153.113	459.34	306.227	0
	253.575	126.788	253.575	0	380.363	126.788	327.306	459.34	459.34	459.34	459.34	153.113	0	306.227
	380.363	253.575	126.788	380.363	0	253.575	163.653	0	0	0	306.227	0	153.113	459.34
	380.363	253.575	380.363	126.788	253.575	0	163.653	0	0	0	0	306.227	459.34	153.113
	0	490.959	327.306	327.306	163.653	163.653	0	0	0	0	592.9	592.9	395.267	395.267
	153.113	306.227	459.34	459.34	0	0	0	0	369.811	369.811	0	0	0	0
	153.113	306.227	459.34	459.34	0	0	0	369.811	0	369.811	0	0	0	0
	153.113	306.227	459.34	459.34	0	0	0	369.811	369.811	0	0	0	0	0
	459.34	306.227	153.113	459.34	306.227	0	592.9	0	0	0	0	0	554.717	0
	459.34	306.227	459.34	153.113	0	306.227	592.9	0	0	0	0	0	0	554.717
	0	459.34	306.227	0	153.113	459.34	395.267	0	0	0	554.717	0	0	0
	0	459.34	0	306.227	459.34	153.113	395.267	0	0	0	0	554.717	0	0
M16=	0	0.8281	0	0	0	0	0	0.7189	0.7189	0.7189	0	0	0	0
	0.8281	0	1.24215	1.24215	0	0	0	0	0	0	0	0	0	0
	0	1.24215	0	0	1.24215	0	0	0	0	0	0.7189	0	0	0
	0	1.24215	0	0	0	1.24215	0	0	0	0	0	0.7189	0	0
	0	0	1.24215	0	0	0	1.02375	0	0	0	0	0	0.7189	0
	0	0	0	1.24215	0	0	1.02375	0	0	0	0	0	0	0.7189
	0	0	0	0	1.02375	1.02375	0	0	0	0	0	0	0	0
	0.7189	0	0	0	0	0	0	0	0	0	0	0	0	0
	0.7189	0	0	0	0	0	0	0	0	0	0	0	0	0
	0.7189	0	0	0	0	0	0	0	0	0	0	0	0	0
	0	0	0.7189	0	0	0	0	0	0	0	0	0	0	0
	0	0	0	0.7189	0	0	0	0	0	0	0	0	0	0
	0	0	0	0	0.7189	0	0	0	0	0	0	0	0	0
	0	0	0	0	0	0.7189	0	0	0	0	0	0	0	0
M17=	0	4	8	8	0	0	0
	4	0	4	4	8	8	0
	8	4	0	8	4	0	10
	8	4	8	0	0	4	10
	0	8	4	0	0	8	5
	0	8	0	4	8	0	5
	0	0	10	10	5	5	0
M18=	0	0	0	0	0	0	0
	0	0	0	0	0	0	0
	0	0	0	0	0	0	0
	0	0	0	0	0	0	0
	0	0	0	0	0	0	0
	0	0	0	0	0	0	0
	0	0	0	0	0	0	0
M19=	0	1	2	2	0	0	0	3	3	3	0	0	0	0
	1	0	0	0	0	0	0	4	4	4	4	4	0	0
	2	0	0	0	0	0	2	0	0	0	2	0	4	0
	2	0	0	0	0	0	2	0	0	0	0	2	0	4
	0	0	0	0	0	0	1	0	0	0	4	0	2	0
	0	0	0	0	0	0	1	0	0	0	0	4	0	2
	0	0	2	2	1	1	0	0	0	0	0	0	2	2
	3	4	0	0	0	0	0	0	0	0	0	0	0	0
	3	4	0	0	0	0	0	0	0	0	0	0	0	0
	3	4	0	0	0	0	0	0	0	0	0	0	0	0
	0	4	2	0	4	0	0	0	0	0	0	0	0	0
	0	4	0	2	0	4	0	0	0	0	0	0	0	0
	0	0	4	0	2	0	2	0	0	0	0	0	0	0
	0	0	0	4	0	2	2	0	0	0	0	0	0	0
M20=	4.1405	4.1405	4.1405	4.1405	4.1405	4.1405	3.4125
	5.7967	5.7967	5.7967	5.7967	5.7967	5.7967	4.7775
	6.3336	6.3336	6.3336	6.3336	6.3336	6.3336	5.22
	6.3336	6.3336	6.3336	6.3336	6.3336	6.3336	5.22
	4.823	4.823	4.823	4.823	4.823	4.823	3.975
	4.823	4.823	4.823	4.823	4.823	4.823	3.975
	4.9686	4.9686	4.9686	4.9686	4.9686	4.9686	4.095
M21=	0	0.8281	1.6562	1.6562	2.4843	2.4843	0
	0.8281	0	0.8281	0.8281	1.6562	1.6562	2.0475
	1.6562	0.8281	0	1.6562	0.8281	2.4843	1.365
	1.6562	0.8281	1.6562	0	2.4843	0.8281	1.365
	2.4843	1.6562	0.8281	2.4843	0	1.6562	0.6825
	2.4843	1.6562	2.4843	0.8281	1.6562	0	0.6825
	0	2.0475	1.365	1.365	0.6825	0.6825	0
M22=	0.8281	0.8281	0.8281	0.8281	0.8281	0.8281	0.6825
	3.3124	3.3124	3.3124	3.3124	3.3124	3.3124	2.73
	2.4843	2.4843	2.4843	2.4843	2.4843	2.4843	2.0475
	2.4843	2.4843	2.4843	2.4843	2.4843	2.4843	2.0475
	2.2659	2.2659	2.2659	2.2659	2.2659	2.2659	1.8675
	2.2659	2.2659	2.2659	2.2659	2.2659	2.2659	1.8675
	2.4843	2.4843	2.4843	2.4843	2.4843	2.4843	2.0475
M23=	0	0	0	0	0	0	0
	0	0	0	0	0	0	0
	0	0	0	0	0	0	0
	0	0	0	0	0	0	0
	0	0	0	0	0	0	0
	0	0	0	0	0	0	0
	0	0	0	0	0	0	0
M24=	0	0	0	0	0	0	13.096	2.338	2.338	2.338	7.014	7.014	9.352	9.352
	0	0	0	0	0	0	9.822	4.676	4.676	4.676	4.676	4.676	7.014	7.014
	0	0	0	0	0	0	6.548	7.014	7.014	7.014	2.338	7.014	4.676	9.352
	0	0	0	0	0	0	6.548	7.014	7.014	7.014	7.014	2.338	9.352	4.676
	0	0	0	0	0	0	3.274	9.352	9.352	9.352	4.676	9.352	2.338	7.014
	0	0	0	0	0	0	3.274	9.352	9.352	9.352	9.352	4.676	7.014	2.338
	13.096	9.822	6.548	6.548	3.274	3.274	0	4.68	4.68	4.68	2.808	2.808	1.872	1.872
	2.338	4.676	7.014	7.014	9.352	9.352	4.68	0	0	0	0	0	0	0
	2.338	4.676	7.014	7.014	9.352	9.352	4.68	0	0	0	0	0	0	0
	2.338	4.676	7.014	7.014	9.352	9.352	4.68	0	0	0	0	0	0	0
	7.014	4.676	2.338	7.014	4.676	9.352	2.808	0	0	0	0	0	0	0
	7.014	4.676	7.014	2.338	9.352	4.676	2.808	0	0	0	0	0	0	0
	9.352	7.014	4.676	9.352	2.338	7.014	1.872	0	0	0	0	0	0	0
	9.352	7.014	9.352	4.676	7.014	2.338	1.872	0	0	0	0	0	0	0
M25=	0	0	0	0	0	0	0	3	3	3	0	0	0	0
	0	0	0	0	0	0	0	0	0	0	0	0	0	0
	0	0	0	0	0	0	0	0	0	0	3	0	0	0
	0	0	0	0	0	0	0	0	0	0	0	3	0	0
	0	0	0	0	0	0	1.5	0	0	0	0	0	3	0
	0	0	0	0	0	0	1.5	0	0	0	0	0	0	3
	0	0	0	0	1.5	1.5	0	0	0	0	0	0	0	0
	3	0	0	0	0	0	0	0	0	0	0	0	0	0
	3	0	0	0	0	0	0	0	0	0	0	0	0	0
	3	0	0	0	0	0	0	0	0	0	0	0	0	0
	0	0	3	0	0	0	0	0	0	0	0	0	0	0
	0	0	0	3	0	0	0	0	0	0	0	0	0	0
	0	0	0	0	3	0	0	0	0	0	0	0	0	0
	0	0	0	0	0	3	0	0	0	0	0	0	0	0
M26=	0	2	0	0	0	0	0
	2	0	1	1	0	0	0
	0	1	0	0	0	0	0
	0	1	0	0	0	0	0
	0	0	0	0	0	0	0
	0	0	0	0	0	0	0
	0	0	0	0	0	0	0
M27=	0	126.788	0	0	0	0	0
	126.788	0	190.181	190.181	0	0	0
	0	190.181	0	0	190.181	0	0
	0	190.181	0	0	0	190.181	0
	0	0	190.181	0	0	0	245.479
	0	0	0	190.181	0	0	245.479
	0	0	0	0	245.479	245.479	0
M28=	0	0	0	0	0	0	0
	0	0	0	0	0	0	0
	0	0	0	0	0	0	0
	0	0	0	0	0	0	0
	0	0	0	0	0	0	1.5
	0	0	0	0	0	0	1.5
	0	0	0	0	1.5	1.5	0
M29=	0	1	2	2	3	3	8	3	3	3	9	9	12	12
	1	0	0	0	0	0	3	4	4	4	4	4	6	6
	2	0	0	0	0	0	2	6	6	6	2	6	4	8
	2	0	0	0	0	0	2	6	6	6	6	2	8	4
	3	0	0	0	0	0	1	8	8	8	4	8	2	6
	3	0	0	0	0	0	1	8	8	8	8	4	6	2
	8	3	2	2	1	1	0	5	5	5	3	3	2	2
	3	4	6	6	8	8	5	0	0	0	0	0	0	0
	3	4	6	6	8	8	5	0	0	0	0	0	0	0
	3	4	6	6	8	8	5	0	0	0	0	0	0	0
	9	4	2	6	4	8	3	0	0	0	0	0	0	0
	9	4	6	2	8	4	3	0	0	0	0	0	0	0
	12	6	4	8	2	6	2	0	0	0	0	0	0	0
	12	6	8	4	6	2	2	0	0	0	0	0	0	0
M30=	0	0	0	0	0	0	13.096
	0	0	0	0	0	0	9.822
	0	0	0	0	0	0	6.548
	0	0	0	0	0	0	6.548
	0	0	0	0	0	0	3.274
	0	0	0	0	0	0	3.274
	13.096	9.822	6.548	6.548	3.274	3.274	0
M31=	0	0.8281	1.6562	1.6562	2.4843	2.4843	2.73
	0.8281	0	0.8281	0.8281	1.6562	1.6562	2.0475
	1.6562	0.8281	0	1.6562	0.8281	2.4843	1.365
	1.6562	0.8281	1.6562	0	2.4843	0.8281	1.365
	2.4843	1.6562	0.8281	2.4843	0	1.6562	0.6825
	2.4843	1.6562	2.4843	0.8281	1.6562	0	0.6825
	2.73	2.0475	1.365	1.365	0.6825	0.6825	0
k	1	2	3	4	5	6	7	8	9	10	11	12	13	14	15	16	17	18	19
I1~I19	12.4695	6.28571	350.038	23.3452	611.786	28.1472	0.575876	1.22449	215.55	82.2	13.304	27.0097	20.076	1.71521	2168492	1335.92	1960.27	0	3042.85
b1~b19	275.862	-255.851	2.26523	-5.2415	-0.993839	9.34287	227.271	-105.477	0.162387	0.614391	-0.822431	1.71906	1.68689	-139.837	5.55423e-05	-0.289797	-0.0495362	0.194503	-0.014055
k	20	21	22	23	24	25	26	27	28	29	30	31
I20~I31	3903.05	2365.14	1745.6	0	0.0188183	0.212848	0.0209361	7.21495	0.00624528	0.0210333	0.00365396	0.002862
b20~b31	-0.0242517	0.032594	0.0589633	-0.0129026	1672.37	651.558	-505.509	14.5297	585.945	1229.77	-7897.27	-85454.1
b0	-884.157
nh	0.142857
ws	6.65202
sm	0.755929
ss	0.109109
T	363.12
Cal. Density (K)	889.031
